# Supplementary material for: Synaptic transmission parallels neuromodulation in a central food-intake circuit
Source: eLife journal article supplement (doi:10.7554/elife.16799), 2016-11-15
Supplement: supp [file elife_poa_e16799_Figure_5_figure_supplement_1.pdf › elife_poa_e16799_Figure_5_figure_supplement_1.pdf]

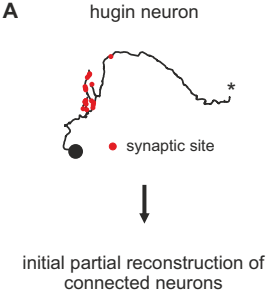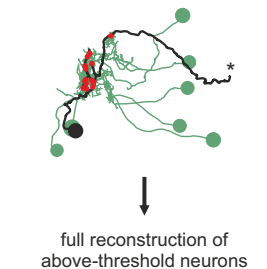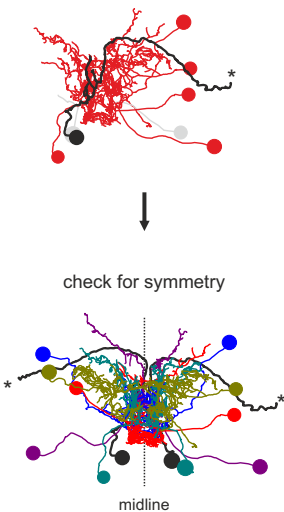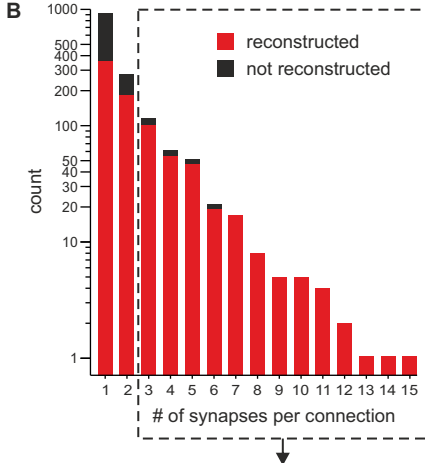

**C**

|         |       | % reconstructed |             |
|---------|-------|-----------------|-------------|
|         |       | postsynaptic    | presynaptic |
| left    | hugin |                 |             |
|         | PC 1  | 100             | 95          |
|         | PC 2  | 100             | 95          |
|         | PC 3  | 100             | 100         |
|         | PC 4  | 100             | 93          |
| right   | PC 1  | 97              | 88          |
|         | PC 2  | 89              | 99          |
|         | PC 3  | 93              | 94          |
|         | PC 4  | 98              | 94          |
| left    | VNC 1 | 83              | 96          |
|         | VNC 2 | 88              | 100         |
| right   | VNC 1 | 72              | 99          |
|         | VNC 2 | 76              | 97          |
| left    | RG 1  | -               | 100         |
|         | RG 2  | -               | 100         |
| right   | RG 1  | -               | 100         |
|         | RG 2  | -               | 100         |
| left    | PH 1  | -               | 90          |
|         | PH 2  | -               | 95          |
| right   | PH 1  | -               | 100         |
|         | PH 2  | -               | 76          |
| average |       | 90              | 96          |
