# Supplementary material for: Synaptic transmission parallels neuromodulation in a central food-intake circuit
Source: eLife journal article supplement (doi:10.7554/elife.16799), 2016-11-15
Supplement: supp [file elife_poa_e16799_Supplementary_File_1.pdf › elife_poa_e16799_Supplementary_File_1.pdf]

# A hugin-PC

1.

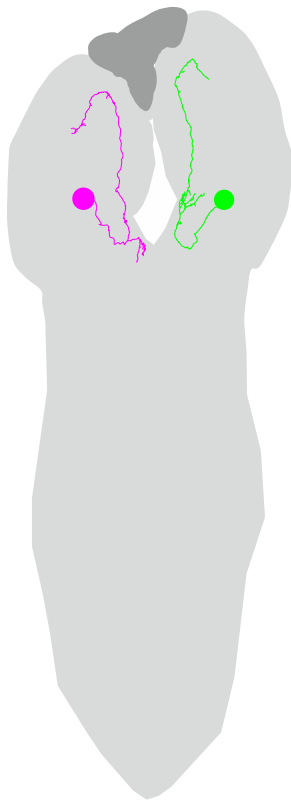

#3299767  
#9796597

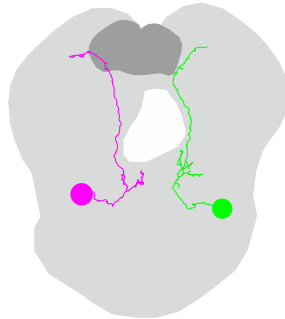

synapses to

synapses from

|                   |   |   |   |   |
|-------------------|---|---|---|---|
| hugin-PC right 1  | 8 | 0 | 4 | 0 |
| hugin-PC right 2  | 0 | 0 | 0 | 0 |
| hugin-PC right 3  | 2 | 0 | 5 | 0 |
| hugin-PC right 4  | 1 | 0 | 1 | 0 |
| hugin-PC left 1   | 0 | 3 | 0 | 4 |
| hugin-PC left 2   | 0 | 0 | 0 | 0 |
| hugin-PC left 3   | 0 | 2 | 0 | 4 |
| hugin-PC left 4   | 0 | 2 | 0 | 3 |
| hugin-RG right 1  | 0 | 0 | 0 | 0 |
| hugin-RG right 2  | 0 | 0 | 0 | 0 |
| hugin-RG left 1   | 0 | 0 | 0 | 0 |
| hugin-RG left 2   | 0 | 0 | 0 | 0 |
| hugin-VNC right 1 | 0 | 1 | 0 | 0 |
| hugin-VNC right 2 | 0 | 0 | 0 | 0 |
| hugin-VNC left 1  | 0 | 0 | 0 | 0 |
| hugin-VNC left 2  | 0 | 0 | 0 | 0 |
| hugin-PH right 1  | 0 | 0 | 0 | 0 |
| hugin-PH right 2  | 0 | 0 | 0 | 0 |
| hugin-PH left 1   | 0 | 0 | 0 | 0 |
| hugin-PH left 2   | 0 | 0 | 0 | 0 |

2.

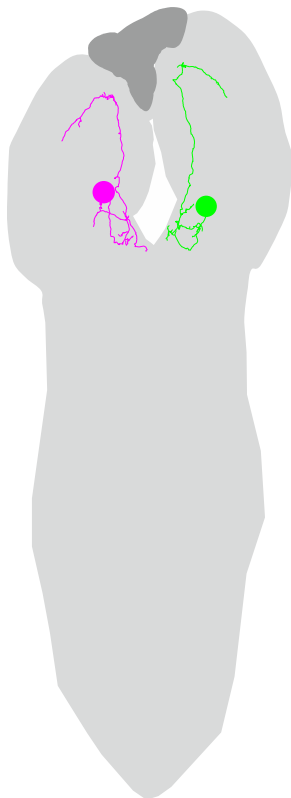

#3315001  
#9789130

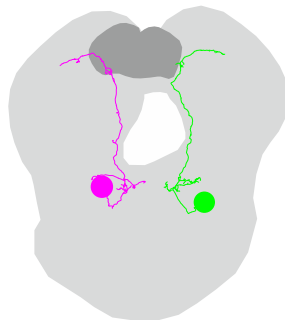

synapses to

synapses from

|                   |   |   |   |   |
|-------------------|---|---|---|---|
| hugin-PC right 1  | 0 | 0 | 0 | 0 |
| hugin-PC right 2  | 4 | 0 | 8 | 0 |
| hugin-PC right 3  | 0 | 0 | 1 | 0 |
| hugin-PC right 4  | 3 | 0 | 5 | 0 |
| hugin-PC left 1   | 0 | 0 | 0 | 0 |
| hugin-PC left 2   | 0 | 4 | 0 | 3 |
| hugin-PC left 3   | 0 | 5 | 0 | 3 |
| hugin-PC left 4   | 0 | 5 | 0 | 7 |
| hugin-RG right 1  | 0 | 0 | 0 | 0 |
| hugin-RG right 2  | 0 | 0 | 0 | 0 |
| hugin-RG left 1   | 0 | 0 | 0 | 0 |
| hugin-RG left 2   | 0 | 1 | 0 | 0 |
| hugin-VNC right 1 | 0 | 0 | 0 | 0 |
| hugin-VNC right 2 | 0 | 2 | 0 | 0 |
| hugin-VNC left 1  | 0 | 0 | 0 | 0 |
| hugin-VNC left 2  | 0 | 0 | 0 | 0 |
| hugin-PH right 1  | 0 | 0 | 0 | 0 |
| hugin-PH right 2  | 0 | 0 | 0 | 0 |
| hugin-PH left 1   | 0 | 0 | 0 | 0 |
| hugin-PH left 2   | 0 | 0 | 0 | 0 |

3.

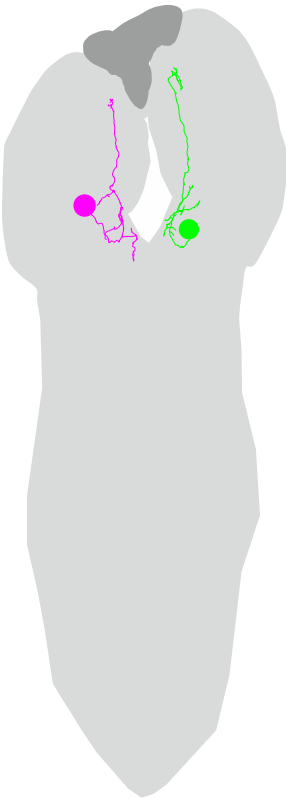

#9748579  
#9805520

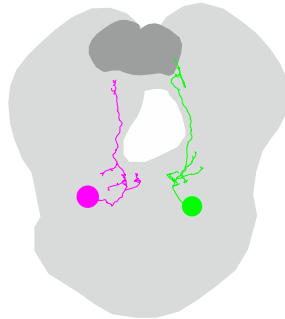

synapses to

synapses from

|                   |   |   |   |   |
|-------------------|---|---|---|---|
| hugin-PC right 1  | 3 | 0 | 0 | 0 |
| hugin-PC right 2  | 5 | 0 | 2 | 0 |
| hugin-PC right 3  | 0 | 0 | 0 | 0 |
| hugin-PC right 4  | 2 | 0 | 2 | 0 |
| hugin-PC left 1   | 0 | 3 | 0 | 5 |
| hugin-PC left 2   | 0 | 4 | 0 | 2 |
| hugin-PC left 3   | 0 | 0 | 0 | 0 |
| hugin-PC left 4   | 0 | 1 | 0 | 1 |
| hugin-RG right 1  | 0 | 0 | 0 | 0 |
| hugin-RG right 2  | 0 | 0 | 0 | 0 |
| hugin-RG left 1   | 0 | 0 | 0 | 0 |
| hugin-RG left 2   | 0 | 0 | 0 | 0 |
| hugin-VNC right 1 | 0 | 0 | 0 | 0 |
| hugin-VNC right 2 | 0 | 0 | 0 | 0 |
| hugin-VNC left 1  | 0 | 0 | 0 | 0 |
| hugin-VNC left 2  | 0 | 0 | 0 | 0 |
| hugin-PH right 1  | 0 | 0 | 0 | 0 |
| hugin-PH right 2  | 0 | 0 | 0 | 0 |
| hugin-PH left 1   | 0 | 0 | 0 | 0 |
| hugin-PH left 2   | 0 | 0 | 0 | 0 |

4.

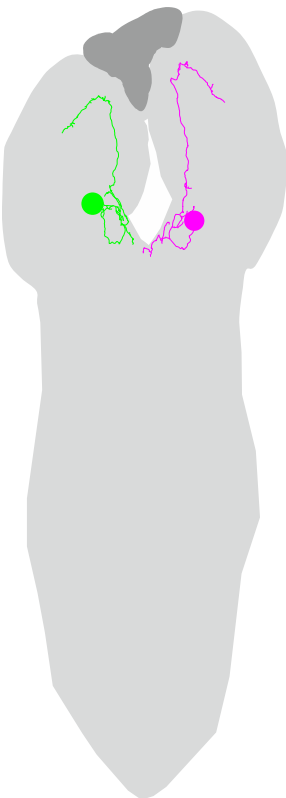

#9813902  
#13581830

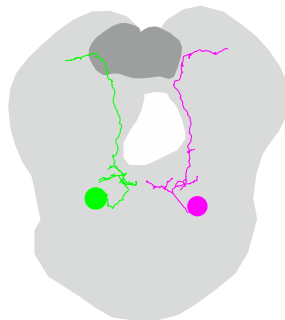

synapses to

synapses from

|                   |   |   |   |   |
|-------------------|---|---|---|---|
| hugin-PC right 1  | 0 | 5 | 0 | 3 |
| hugin-PC right 2  | 0 | 3 | 0 | 1 |
| hugin-PC right 3  | 0 | 2 | 0 | 2 |
| hugin-PC right 4  | 0 | 0 | 0 | 0 |
| hugin-PC left 1   | 7 | 0 | 5 | 0 |
| hugin-PC left 2   | 3 | 0 | 2 | 0 |
| hugin-PC left 3   | 1 | 0 | 1 | 0 |
| hugin-PC left 4   | 0 | 0 | 0 | 0 |
| hugin-RG right 1  | 0 | 0 | 0 | 0 |
| hugin-RG right 2  | 0 | 0 | 0 | 0 |
| hugin-RG left 1   | 0 | 0 | 0 | 0 |
| hugin-RG left 2   | 1 | 0 | 0 | 0 |
| hugin-VNC right 1 | 0 | 0 | 0 | 0 |
| hugin-VNC right 2 | 0 | 0 | 0 | 0 |
| hugin-VNC left 1  | 0 | 0 | 0 | 0 |
| hugin-VNC left 2  | 0 | 0 | 0 | 0 |
| hugin-PH right 1  | 0 | 0 | 0 | 0 |
| hugin-PH right 2  | 0 | 0 | 0 | 0 |
| hugin-PH left 1   | 0 | 0 | 0 | 0 |
| hugin-PH left 2   | 0 | 0 | 0 | 0 |

## B hugin-VNC

1.

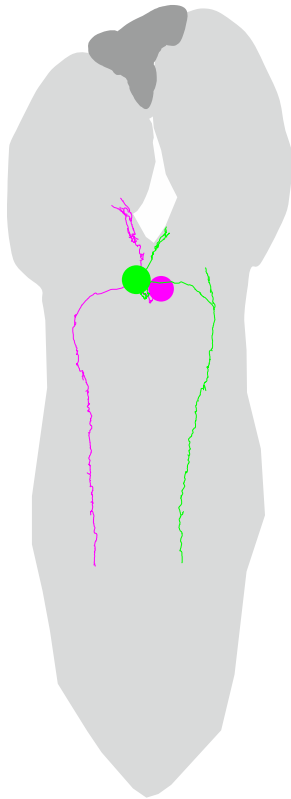

#2613532  
#3594705

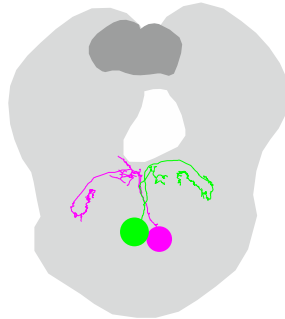

synapses to

synapses from

|                   |   |   |   |   |
|-------------------|---|---|---|---|
| hugin-PC right 1  | 0 | 0 | 0 | 0 |
| hugin-PC right 2  | 0 | 0 | 0 | 0 |
| hugin-PC right 3  | 0 | 0 | 0 | 0 |
| hugin-PC right 4  | 0 | 0 | 0 | 0 |
| hugin-PC left 1   | 0 | 0 | 0 | 2 |
| hugin-PC left 2   | 0 | 0 | 0 | 0 |
| hugin-PC left 3   | 0 | 0 | 0 | 0 |
| hugin-PC left 4   | 0 | 0 | 0 | 0 |
| hugin-RG right 1  | 0 | 0 | 0 | 0 |
| hugin-RG right 2  | 0 | 0 | 0 | 0 |
| hugin-RG left 1   | 0 | 0 | 0 | 0 |
| hugin-RG left 2   | 0 | 0 | 0 | 0 |
| hugin-VNC right 1 | 0 | 2 | 0 | 5 |
| hugin-VNC right 2 | 0 | 0 | 0 | 0 |
| hugin-VNC left 1  | 7 | 0 | 6 | 0 |
| hugin-VNC left 2  | 0 | 0 | 0 | 0 |
| hugin-PH right 1  | 0 | 0 | 0 | 0 |
| hugin-PH right 2  | 0 | 0 | 0 | 0 |
| hugin-PH left 1   | 0 | 0 | 0 | 0 |
| hugin-PH left 2   | 0 | 0 | 0 | 0 |

2.

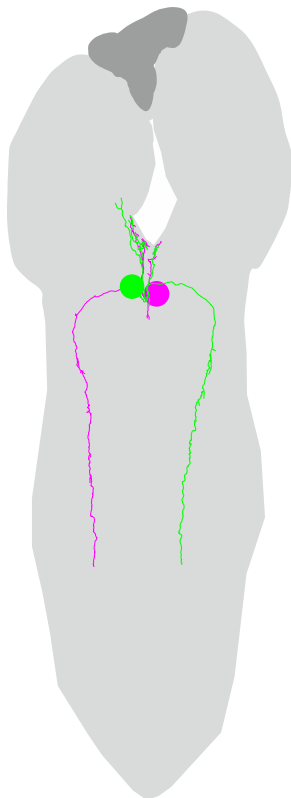

#2613540  
#6795358

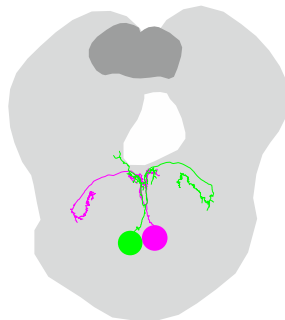

synapses to

synapses from

|                   |   |   |   |   |
|-------------------|---|---|---|---|
| hugin-PC right 1  | 0 | 0 | 0 | 0 |
| hugin-PC right 2  | 0 | 0 | 0 | 0 |
| hugin-PC right 3  | 0 | 0 | 0 | 0 |
| hugin-PC right 4  | 0 | 0 | 0 | 0 |
| hugin-PC left 1   | 0 | 0 | 0 | 0 |
| hugin-PC left 2   | 0 | 0 | 0 | 1 |
| hugin-PC left 3   | 0 | 0 | 0 | 0 |
| hugin-PC left 4   | 0 | 0 | 0 | 0 |
| hugin-RG right 1  | 0 | 0 | 0 | 0 |
| hugin-RG right 2  | 0 | 0 | 0 | 0 |
| hugin-RG left 1   | 0 | 0 | 0 | 0 |
| hugin-RG left 2   | 0 | 0 | 0 | 0 |
| hugin-VNC right 1 | 0 | 0 | 0 | 0 |
| hugin-VNC right 2 | 0 | 5 | 0 | 2 |
| hugin-VNC left 1  | 0 | 0 | 0 | 0 |
| hugin-VNC left 2  | 6 | 0 | 7 | 0 |
| hugin-PH right 1  | 0 | 0 | 0 | 0 |
| hugin-PH right 2  | 0 | 0 | 0 | 0 |
| hugin-PH left 1   | 0 | 0 | 0 | 0 |
| hugin-PH left 2   | 0 | 0 | 0 | 0 |

## C hugin-RG

1.

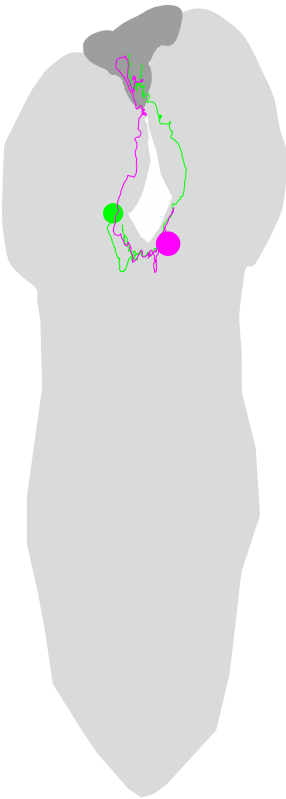

#2138427  
#5038703

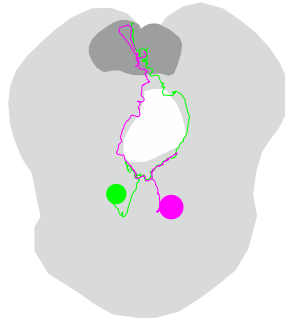

synapses to

synapses from

|                   |   |   |   |   |
|-------------------|---|---|---|---|
| hugin-PC right 1  | 0 | 0 | 0 | 0 |
| hugin-PC right 2  | 0 | 0 | 0 | 0 |
| hugin-PC right 3  | 0 | 0 | 0 | 0 |
| hugin-PC right 4  | 0 | 0 | 0 | 0 |
| hugin-PC left 1   | 0 | 0 | 0 | 0 |
| hugin-PC left 2   | 0 | 0 | 0 | 0 |
| hugin-PC left 3   | 0 | 0 | 0 | 0 |
| hugin-PC left 4   | 0 | 0 | 0 | 0 |
| hugin-RG right 1  | 0 | 0 | 0 | 0 |
| hugin-RG right 2  | 0 | 0 | 0 | 0 |
| hugin-RG left 1   | 0 | 0 | 0 | 0 |
| hugin-RG left 2   | 0 | 0 | 0 | 0 |
| hugin-VNC right 1 | 0 | 0 | 0 | 0 |
| hugin-VNC right 2 | 0 | 0 | 0 | 0 |
| hugin-VNC left 1  | 0 | 0 | 0 | 0 |
| hugin-VNC left 2  | 0 | 0 | 0 | 0 |
| hugin-PH right 1  | 0 | 0 | 0 | 0 |
| hugin-PH right 2  | 0 | 0 | 0 | 0 |
| hugin-PH left 1   | 0 | 0 | 0 | 0 |
| hugin-PH left 2   | 0 | 0 | 0 | 0 |

2.

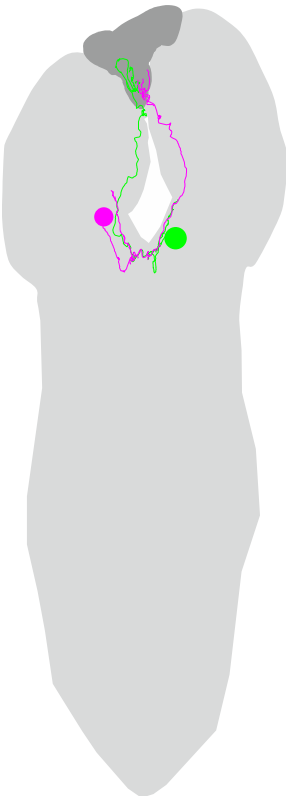

#5601924  
#5615961

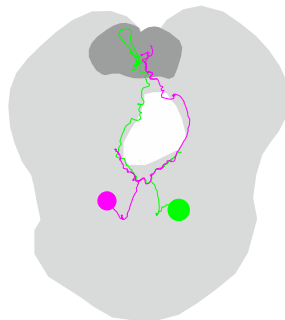

synapses to

synapses from

|                   |   |   |   |   |
|-------------------|---|---|---|---|
| hugin-PC right 1  | 0 | 0 | 0 | 0 |
| hugin-PC right 2  | 0 | 0 | 0 | 0 |
| hugin-PC right 3  | 0 | 0 | 0 | 0 |
| hugin-PC right 4  | 0 | 0 | 0 | 0 |
| hugin-PC left 1   | 0 | 0 | 0 | 1 |
| hugin-PC left 2   | 0 | 0 | 0 | 0 |
| hugin-PC left 3   | 0 | 0 | 0 | 0 |
| hugin-PC left 4   | 0 | 0 | 0 | 1 |
| hugin-RG right 1  | 0 | 0 | 0 | 0 |
| hugin-RG right 2  | 0 | 0 | 0 | 0 |
| hugin-RG left 1   | 0 | 0 | 0 | 0 |
| hugin-RG left 2   | 0 | 0 | 0 | 0 |
| hugin-VNC right 1 | 0 | 0 | 0 | 0 |
| hugin-VNC right 2 | 0 | 0 | 0 | 0 |
| hugin-VNC left 1  | 0 | 0 | 0 | 0 |
| hugin-VNC left 2  | 0 | 0 | 0 | 0 |
| hugin-PH right 1  | 0 | 0 | 0 | 0 |
| hugin-PH right 2  | 0 | 0 | 0 | 0 |
| hugin-PH left 1   | 0 | 0 | 0 | 0 |
| hugin-PH left 2   | 0 | 0 | 0 | 0 |

## D hugin-PH

1.

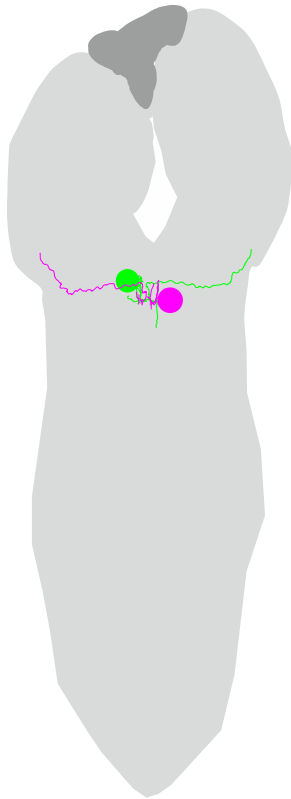

#2606279  
#2810998

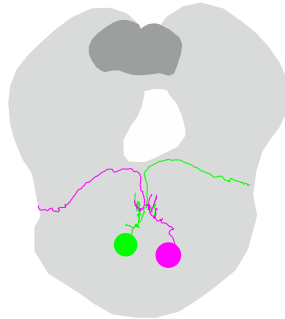

synapses to

synapses from

|                   |   |   |   |   |
|-------------------|---|---|---|---|
| hugin-PC right 1  | 0 | 0 | 0 | 0 |
| hugin-PC right 2  | 0 | 0 | 0 | 0 |
| hugin-PC right 3  | 0 | 0 | 0 | 0 |
| hugin-PC right 4  | 0 | 0 | 0 | 0 |
| hugin-PC left 1   | 0 | 0 | 0 | 0 |
| hugin-PC left 2   | 0 | 0 | 0 | 0 |
| hugin-PC left 3   | 0 | 0 | 0 | 0 |
| hugin-PC left 4   | 0 | 0 | 0 | 0 |
| hugin-RG right 1  | 0 | 0 | 0 | 0 |
| hugin-RG right 2  | 0 | 0 | 0 | 0 |
| hugin-RG left 1   | 0 | 0 | 0 | 0 |
| hugin-RG left 2   | 0 | 0 | 0 | 0 |
| hugin-VNC right 1 | 0 | 0 | 0 | 0 |
| hugin-VNC right 2 | 0 | 0 | 0 | 0 |
| hugin-VNC left 1  | 0 | 0 | 0 | 0 |
| hugin-VNC left 2  | 0 | 0 | 0 | 0 |
| hugin-PH right 1  | 0 | 0 | 0 | 0 |
| hugin-PH right 2  | 0 | 0 | 0 | 0 |
| hugin-PH left 1   | 0 | 0 | 0 | 1 |
| hugin-PH left 2   | 0 | 0 | 0 | 0 |

2.

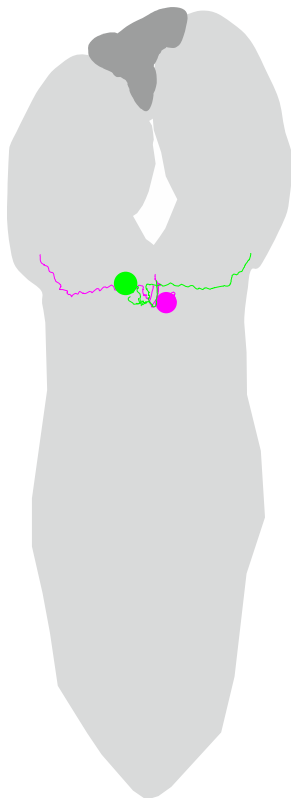

#2679278  
#2811369

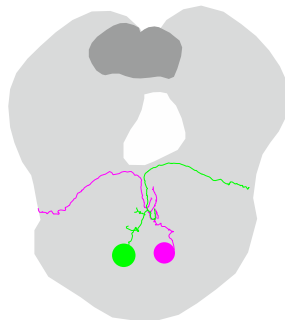

synapses to

synapses from

|                   |   |   |   |   |
|-------------------|---|---|---|---|
| hugin-PC right 1  | 0 | 0 | 0 | 0 |
| hugin-PC right 2  | 0 | 0 | 0 | 0 |
| hugin-PC right 3  | 0 | 0 | 0 | 0 |
| hugin-PC right 4  | 0 | 0 | 0 | 0 |
| hugin-PC left 1   | 0 | 0 | 0 | 0 |
| hugin-PC left 2   | 0 | 0 | 0 | 0 |
| hugin-PC left 3   | 0 | 0 | 0 | 0 |
| hugin-PC left 4   | 0 | 0 | 0 | 0 |
| hugin-RG right 1  | 0 | 0 | 0 | 0 |
| hugin-RG right 2  | 0 | 0 | 0 | 0 |
| hugin-RG left 1   | 0 | 0 | 0 | 0 |
| hugin-RG left 2   | 0 | 0 | 0 | 0 |
| hugin-VNC right 1 | 0 | 0 | 0 | 0 |
| hugin-VNC right 2 | 0 | 0 | 0 | 0 |
| hugin-VNC left 1  | 0 | 0 | 0 | 0 |
| hugin-VNC left 2  | 0 | 0 | 0 | 0 |
| hugin-PH right 1  | 0 | 0 | 0 | 0 |
| hugin-PH right 2  | 1 | 0 | 0 | 0 |
| hugin-PH left 1   | 0 | 0 | 0 | 0 |
| hugin-PH left 2   | 0 | 0 | 0 | 0 |

# E Insulin-producing cells (IPCs)

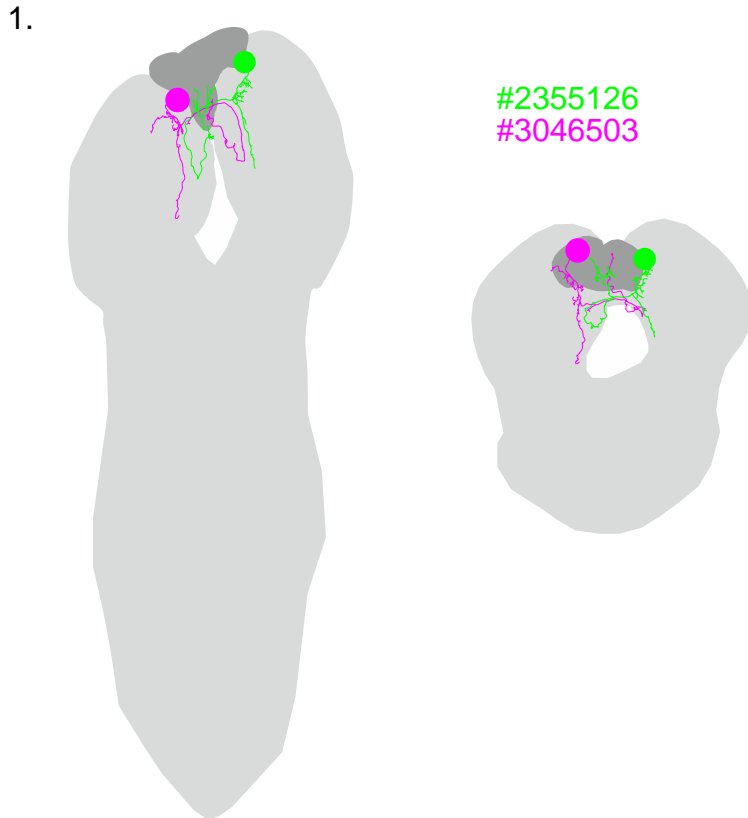

|                   | synapses to |   | synapses from |   |
|-------------------|-------------|---|---------------|---|
| hugin-PC right 1  | 0           | 0 | 2             | 0 |
| hugin-PC right 2  | 0           | 0 | 6             | 0 |
| hugin-PC right 3  | 0           | 0 | 2             | 0 |
| hugin-PC right 4  | 0           | 0 | 0             | 0 |
| hugin-PC left 1   | 0           | 0 | 0             | 2 |
| hugin-PC left 2   | 0           | 0 | 0             | 0 |
| hugin-PC left 3   | 0           | 0 | 0             | 2 |
| hugin-PC left 4   | 0           | 0 | 0             | 2 |
| hugin-RG right 1  | 0           | 0 | 0             | 0 |
| hugin-RG right 2  | 0           | 0 | 0             | 0 |
| hugin-RG left 1   | 0           | 0 | 0             | 0 |
| hugin-RG left 2   | 0           | 0 | 0             | 0 |
| hugin-VNC right 1 | 0           | 0 | 0             | 0 |
| hugin-VNC right 2 | 0           | 0 | 0             | 0 |
| hugin-VNC left 1  | 0           | 0 | 0             | 0 |
| hugin-VNC left 2  | 0           | 0 | 0             | 0 |
| hugin-PH right 1  | 0           | 0 | 0             | 0 |
| hugin-PH right 2  | 0           | 0 | 0             | 0 |
| hugin-PH left 1   | 0           | 0 | 0             | 0 |
| hugin-PH left 2   | 0           | 0 | 0             | 0 |

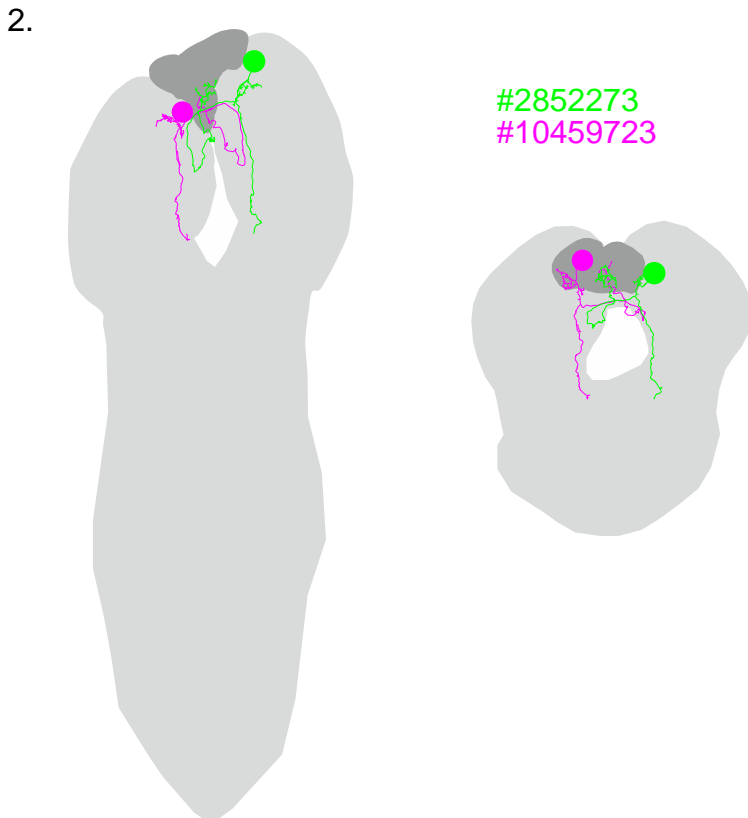

|                   | synapses to |   | synapses from |   |
|-------------------|-------------|---|---------------|---|
| hugin-PC right 1  | 0           | 0 | 1             | 0 |
| hugin-PC right 2  | 0           | 0 | 5             | 0 |
| hugin-PC right 3  | 0           | 0 | 1             | 0 |
| hugin-PC right 4  | 0           | 0 | 1             | 0 |
| hugin-PC left 1   | 0           | 0 | 0             | 2 |
| hugin-PC left 2   | 0           | 0 | 0             | 1 |
| hugin-PC left 3   | 0           | 0 | 0             | 0 |
| hugin-PC left 4   | 0           | 0 | 0             | 3 |
| hugin-RG right 1  | 0           | 0 | 1             | 0 |
| hugin-RG right 2  | 0           | 0 | 0             | 0 |
| hugin-RG left 1   | 0           | 0 | 0             | 0 |
| hugin-RG left 2   | 0           | 0 | 0             | 0 |
| hugin-VNC right 1 | 0           | 0 | 0             | 0 |
| hugin-VNC right 2 | 0           | 0 | 0             | 0 |
| hugin-VNC left 1  | 0           | 0 | 0             | 0 |
| hugin-VNC left 2  | 0           | 0 | 0             | 0 |
| hugin-PH right 1  | 0           | 0 | 0             | 0 |
| hugin-PH right 2  | 0           | 0 | 0             | 0 |
| hugin-PH left 1   | 0           | 0 | 0             | 0 |
| hugin-PH left 2   | 0           | 0 | 0             | 0 |

3.

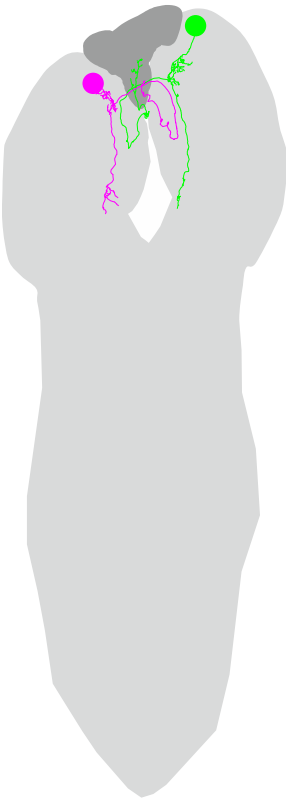

#2283495  
#12634154

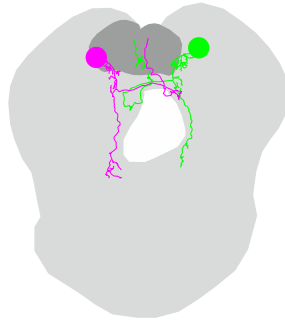

synapses to

synapses from

|                   |   |   |   |   |
|-------------------|---|---|---|---|
| hugin-PC right 1  | 0 | 0 | 4 | 0 |
| hugin-PC right 2  | 0 | 0 | 5 | 0 |
| hugin-PC right 3  | 0 | 0 | 3 | 0 |
| hugin-PC right 4  | 0 | 0 | 1 | 0 |
| hugin-PC left 1   | 0 | 0 | 0 | 0 |
| hugin-PC left 2   | 0 | 0 | 0 | 5 |
| hugin-PC left 3   | 0 | 0 | 0 | 3 |
| hugin-PC left 4   | 0 | 0 | 0 | 3 |
| hugin-RG right 1  | 0 | 0 | 0 | 0 |
| hugin-RG right 2  | 0 | 0 | 1 | 0 |
| hugin-RG left 1   | 0 | 0 | 0 | 0 |
| hugin-RG left 2   | 0 | 0 | 0 | 0 |
| hugin-VNC right 1 | 0 | 0 | 0 | 0 |
| hugin-VNC right 2 | 0 | 0 | 0 | 0 |
| hugin-VNC left 1  | 0 | 0 | 0 | 0 |
| hugin-VNC left 2  | 0 | 0 | 0 | 0 |
| hugin-PH right 1  | 0 | 0 | 0 | 0 |
| hugin-PH right 2  | 0 | 0 | 0 | 0 |
| hugin-PH left 1   | 0 | 0 | 0 | 0 |
| hugin-PH left 2   | 0 | 0 | 0 | 0 |

4.

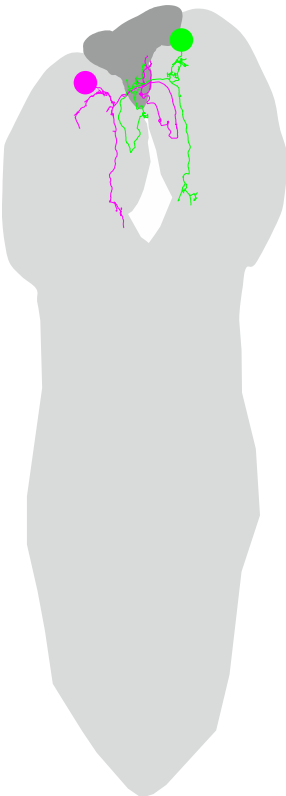

#2357110  
#4506509

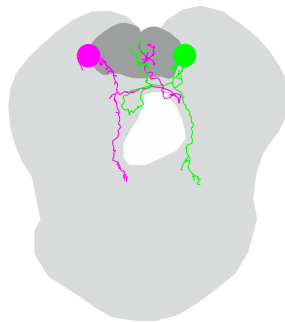

synapses to

synapses from

|                   |   |   |   |   |
|-------------------|---|---|---|---|
| hugin-PC right 1  | 0 | 0 | 1 | 0 |
| hugin-PC right 2  | 0 | 0 | 3 | 0 |
| hugin-PC right 3  | 0 | 0 | 0 | 0 |
| hugin-PC right 4  | 0 | 0 | 1 | 0 |
| hugin-PC left 1   | 0 | 0 | 0 | 9 |
| hugin-PC left 2   | 0 | 0 | 0 | 1 |
| hugin-PC left 3   | 0 | 0 | 0 | 1 |
| hugin-PC left 4   | 0 | 0 | 0 | 2 |
| hugin-RG right 1  | 0 | 0 | 0 | 0 |
| hugin-RG right 2  | 0 | 0 | 0 | 0 |
| hugin-RG left 1   | 0 | 0 | 0 | 0 |
| hugin-RG left 2   | 0 | 0 | 0 | 0 |
| hugin-VNC right 1 | 0 | 0 | 0 | 0 |
| hugin-VNC right 2 | 0 | 0 | 0 | 0 |
| hugin-VNC left 1  | 0 | 0 | 0 | 0 |
| hugin-VNC left 2  | 0 | 0 | 0 | 0 |
| hugin-PH right 1  | 0 | 0 | 0 | 0 |
| hugin-PH right 2  | 0 | 0 | 0 | 0 |
| hugin-PH left 1   | 0 | 0 | 0 | 0 |
| hugin-PH left 2   | 0 | 0 | 0 | 0 |

5.

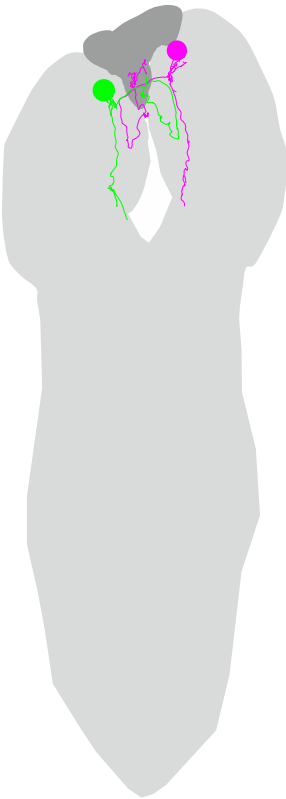

#3281684  
#3561724

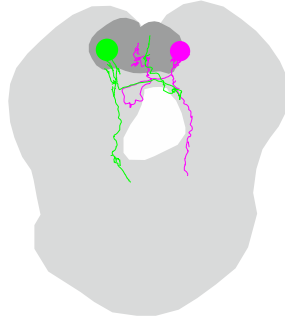

synapses to

synapses from

|                   |   |   |   |   |
|-------------------|---|---|---|---|
| hugin-PC right 1  | 0 | 0 | 0 | 1 |
| hugin-PC right 2  | 0 | 0 | 0 | 4 |
| hugin-PC right 3  | 0 | 0 | 0 | 5 |
| hugin-PC right 4  | 0 | 0 | 0 | 0 |
| hugin-PC left 1   | 0 | 0 | 3 | 0 |
| hugin-PC left 2   | 0 | 0 | 1 | 0 |
| hugin-PC left 3   | 0 | 0 | 3 | 0 |
| hugin-PC left 4   | 0 | 0 | 2 | 0 |
| hugin-RG right 1  | 0 | 0 | 0 | 0 |
| hugin-RG right 2  | 0 | 0 | 0 | 0 |
| hugin-RG left 1   | 0 | 0 | 0 | 0 |
| hugin-RG left 2   | 0 | 0 | 0 | 0 |
| hugin-VNC right 1 | 0 | 0 | 0 | 0 |
| hugin-VNC right 2 | 0 | 0 | 0 | 0 |
| hugin-VNC left 1  | 0 | 0 | 0 | 0 |
| hugin-VNC left 2  | 0 | 0 | 0 | 0 |
| hugin-PH right 1  | 0 | 0 | 0 | 0 |
| hugin-PH right 2  | 0 | 0 | 0 | 0 |
| hugin-PH left 1   | 0 | 0 | 0 | 0 |
| hugin-PH left 2   | 0 | 0 | 0 | 0 |

6.

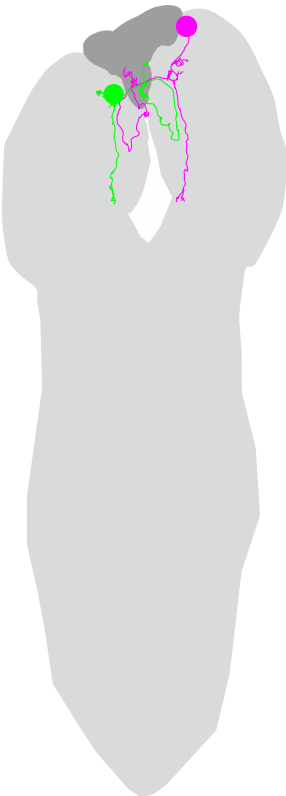

#4453485  
#15202263

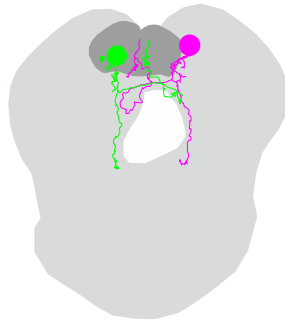

synapses to

synapses from

|                   |   |   |   |   |
|-------------------|---|---|---|---|
| hugin-PC right 1  | 0 | 0 | 0 | 7 |
| hugin-PC right 2  | 0 | 0 | 0 | 1 |
| hugin-PC right 3  | 0 | 0 | 0 | 1 |
| hugin-PC right 4  | 0 | 0 | 0 | 1 |
| hugin-PC left 1   | 0 | 0 | 4 | 0 |
| hugin-PC left 2   | 0 | 0 | 3 | 0 |
| hugin-PC left 3   | 0 | 0 | 1 | 0 |
| hugin-PC left 4   | 0 | 0 | 0 | 0 |
| hugin-RG right 1  | 0 | 0 | 0 | 0 |
| hugin-RG right 2  | 0 | 0 | 0 | 0 |
| hugin-RG left 1   | 0 | 0 | 0 | 0 |
| hugin-RG left 2   | 0 | 0 | 1 | 0 |
| hugin-VNC right 1 | 0 | 0 | 0 | 0 |
| hugin-VNC right 2 | 0 | 0 | 0 | 0 |
| hugin-VNC left 1  | 0 | 0 | 0 | 0 |
| hugin-VNC left 2  | 0 | 0 | 0 | 0 |
| hugin-PH right 1  | 0 | 0 | 0 | 0 |
| hugin-PH right 2  | 0 | 0 | 0 | 0 |
| hugin-PH left 1   | 0 | 0 | 0 | 0 |
| hugin-PH left 2   | 0 | 0 | 0 | 0 |



7.

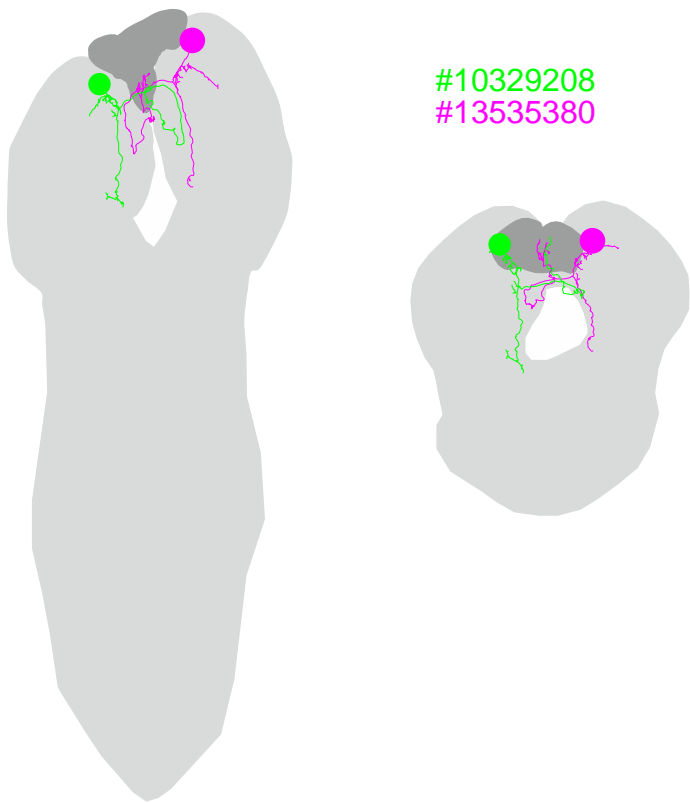

|                   | synapses to |   | synapses from |   |
|-------------------|-------------|---|---------------|---|
| hugin-PC right 1  | 0           | 1 | 0             | 7 |
| hugin-PC right 2  | 0           | 0 | 0             | 3 |
| hugin-PC right 3  | 0           | 0 | 0             | 3 |
| hugin-PC right 4  | 0           | 0 | 0             | 1 |
| hugin-PC left 1   | 0           | 0 | 7             | 0 |
| hugin-PC left 2   | 0           | 0 | 2             | 0 |
| hugin-PC left 3   | 0           | 0 | 4             | 0 |
| hugin-PC left 4   | 0           | 0 | 1             | 0 |
| hugin-RG right 1  | 0           | 0 | 0             | 0 |
| hugin-RG right 2  | 0           | 0 | 0             | 0 |
| hugin-RG left 1   | 0           | 0 | 0             | 0 |
| hugin-RG left 2   | 0           | 0 | 0             | 0 |
| hugin-VNC right 1 | 0           | 0 | 0             | 0 |
| hugin-VNC right 2 | 0           | 0 | 0             | 0 |
| hugin-VNC left 1  | 0           | 0 | 0             | 0 |
| hugin-VNC left 2  | 0           | 0 | 0             | 0 |
| hugin-PH right 1  | 0           | 0 | 0             | 0 |
| hugin-PH right 2  | 0           | 0 | 0             | 0 |
| hugin-PH left 1   | 0           | 0 | 0             | 0 |
| hugin-PH left 2   | 0           | 0 | 0             | 0 |

## F DH44-producing mNSCs

1.

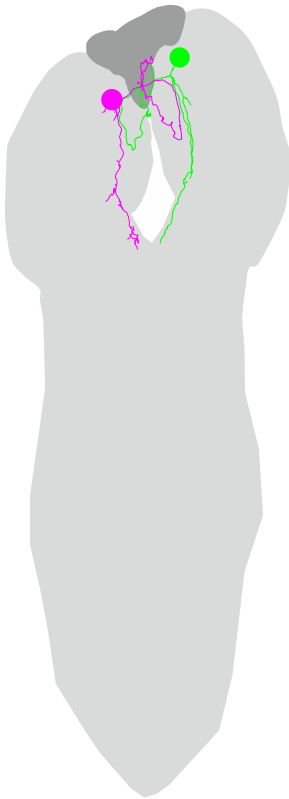

#2260755  
#10418394

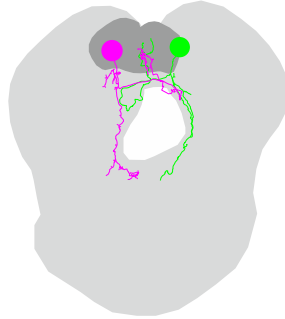

synapses to

synapses from

|                   |   |   |   |   |
|-------------------|---|---|---|---|
| hugin-PC right 1  | 0 | 0 | 0 | 0 |
| hugin-PC right 2  | 0 | 0 | 1 | 0 |
| hugin-PC right 3  | 0 | 0 | 1 | 0 |
| hugin-PC right 4  | 0 | 0 | 0 | 0 |
| hugin-PC left 1   | 0 | 0 | 0 | 1 |
| hugin-PC left 2   | 0 | 0 | 0 | 0 |
| hugin-PC left 3   | 0 | 0 | 0 | 2 |
| hugin-PC left 4   | 0 | 0 | 0 | 0 |
| hugin-RG right 1  | 0 | 0 | 0 | 0 |
| hugin-RG right 2  | 0 | 0 | 0 | 0 |
| hugin-RG left 1   | 0 | 0 | 0 | 0 |
| hugin-RG left 2   | 0 | 0 | 0 | 0 |
| hugin-VNC right 1 | 0 | 0 | 0 | 0 |
| hugin-VNC right 2 | 0 | 0 | 0 | 0 |
| hugin-VNC left 1  | 0 | 0 | 0 | 0 |
| hugin-VNC left 2  | 0 | 0 | 0 | 0 |
| hugin-PH right 1  | 0 | 0 | 0 | 0 |
| hugin-PH right 2  | 0 | 0 | 0 | 0 |
| hugin-PH left 1   | 0 | 0 | 0 | 0 |
| hugin-PH left 2   | 0 | 0 | 0 | 0 |

2.

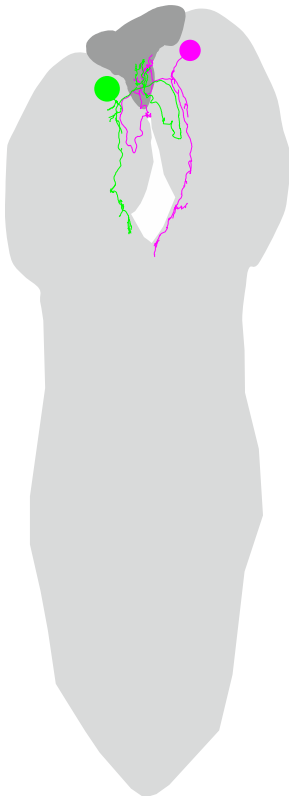

#4400767  
#13751194

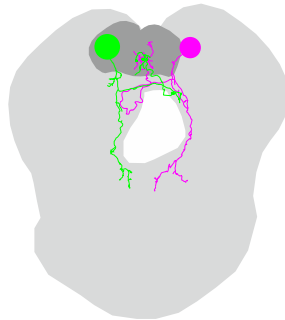

synapses to

synapses from

|                   |   |   |   |   |
|-------------------|---|---|---|---|
| hugin-PC right 1  | 0 | 0 | 0 | 0 |
| hugin-PC right 2  | 0 | 0 | 0 | 0 |
| hugin-PC right 3  | 0 | 0 | 0 | 0 |
| hugin-PC right 4  | 0 | 0 | 0 | 0 |
| hugin-PC left 1   | 0 | 0 | 0 | 0 |
| hugin-PC left 2   | 0 | 0 | 0 | 0 |
| hugin-PC left 3   | 0 | 0 | 1 | 0 |
| hugin-PC left 4   | 0 | 0 | 0 | 0 |
| hugin-RG right 1  | 0 | 0 | 0 | 0 |
| hugin-RG right 2  | 0 | 0 | 0 | 1 |
| hugin-RG left 1   | 0 | 0 | 0 | 0 |
| hugin-RG left 2   | 0 | 0 | 0 | 0 |
| hugin-VNC right 1 | 0 | 0 | 0 | 0 |
| hugin-VNC right 2 | 0 | 0 | 0 | 0 |
| hugin-VNC left 1  | 0 | 0 | 0 | 0 |
| hugin-VNC left 2  | 0 | 0 | 0 | 0 |
| hugin-PH right 1  | 0 | 0 | 0 | 0 |
| hugin-PH right 2  | 0 | 0 | 0 | 0 |
| hugin-PH left 1   | 0 | 0 | 0 | 0 |
| hugin-PH left 2   | 0 | 0 | 0 | 0 |

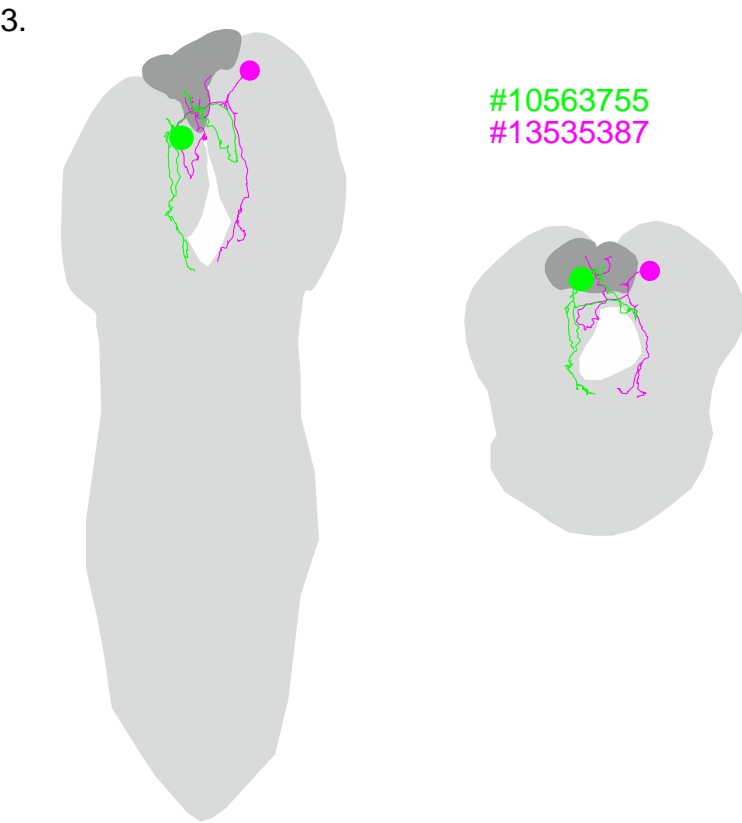

|                   | synapses to |   | synapses from |   |
|-------------------|-------------|---|---------------|---|
| hugin-PC right 1  | 0           | 0 | 0             | 0 |
| hugin-PC right 2  | 0           | 0 | 0             | 0 |
| hugin-PC right 3  | 0           | 0 | 0             | 0 |
| hugin-PC right 4  | 0           | 0 | 0             | 0 |
| hugin-PC left 1   | 0           | 0 | 0             | 0 |
| hugin-PC left 2   | 0           | 0 | 0             | 0 |
| hugin-PC left 3   | 0           | 0 | 0             | 0 |
| hugin-PC left 4   | 0           | 0 | 0             | 0 |
| hugin-RG right 1  | 0           | 0 | 0             | 0 |
| hugin-RG right 2  | 0           | 0 | 0             | 0 |
| hugin-RG left 1   | 0           | 0 | 0             | 0 |
| hugin-RG left 2   | 0           | 0 | 0             | 0 |
| hugin-VNC right 1 | 0           | 0 | 0             | 0 |
| hugin-VNC right 2 | 0           | 0 | 0             | 0 |
| hugin-VNC left 1  | 0           | 0 | 0             | 0 |
| hugin-VNC left 2  | 0           | 0 | 0             | 0 |
| hugin-PH right 1  | 0           | 0 | 0             | 0 |
| hugin-PH right 2  | 0           | 0 | 0             | 0 |
| hugin-PH left 1   | 0           | 0 | 0             | 0 |
| hugin-PH left 2   | 0           | 0 | 0             | 0 |

## G DMS-producing mNSCs

1.

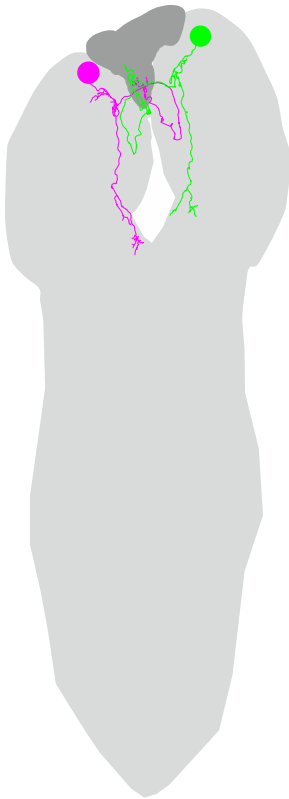

#2659386  
#4523584

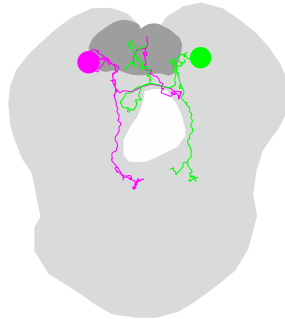

synapses to

synapses from

|                   |   |   |   |   |
|-------------------|---|---|---|---|
| hugin-PC right 1  | 0 | 0 | 0 | 0 |
| hugin-PC right 2  | 0 | 0 | 0 | 0 |
| hugin-PC right 3  | 0 | 0 | 0 | 0 |
| hugin-PC right 4  | 0 | 0 | 1 | 0 |
| hugin-PC left 1   | 0 | 0 | 0 | 1 |
| hugin-PC left 2   | 0 | 0 | 0 | 3 |
| hugin-PC left 3   | 0 | 0 | 0 | 0 |
| hugin-PC left 4   | 0 | 0 | 0 | 3 |
| hugin-RG right 1  | 0 | 0 | 0 | 0 |
| hugin-RG right 2  | 0 | 0 | 0 | 0 |
| hugin-RG left 1   | 0 | 0 | 0 | 0 |
| hugin-RG left 2   | 0 | 0 | 0 | 0 |
| hugin-VNC right 1 | 0 | 0 | 0 | 0 |
| hugin-VNC right 2 | 0 | 0 | 0 | 0 |
| hugin-VNC left 1  | 0 | 0 | 0 | 0 |
| hugin-VNC left 2  | 0 | 0 | 0 | 0 |
| hugin-PH right 1  | 0 | 0 | 0 | 0 |
| hugin-PH right 2  | 0 | 0 | 0 | 0 |
| hugin-PH left 1   | 0 | 0 | 0 | 0 |
| hugin-PH left 2   | 0 | 0 | 0 | 0 |

2.

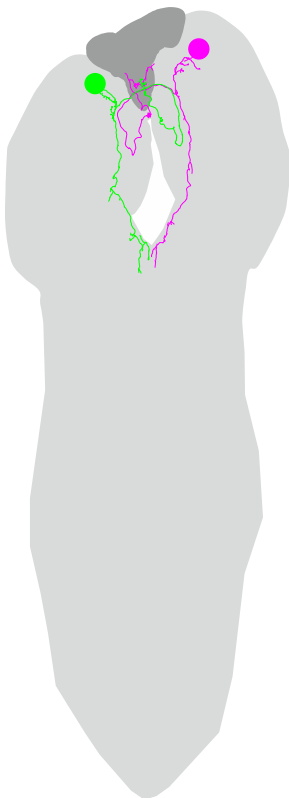

#4523803  
#13793212

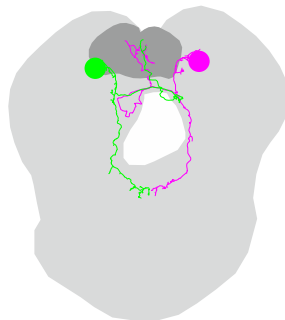

synapses to

synapses from

|                   |   |   |   |   |
|-------------------|---|---|---|---|
| hugin-PC right 1  | 0 | 0 | 0 | 0 |
| hugin-PC right 2  | 0 | 0 | 0 | 0 |
| hugin-PC right 3  | 0 | 0 | 0 | 0 |
| hugin-PC right 4  | 0 | 0 | 0 | 0 |
| hugin-PC left 1   | 0 | 0 | 1 | 0 |
| hugin-PC left 2   | 0 | 0 | 0 | 0 |
| hugin-PC left 3   | 0 | 0 | 2 | 0 |
| hugin-PC left 4   | 0 | 0 | 0 | 0 |
| hugin-RG right 1  | 0 | 0 | 0 | 0 |
| hugin-RG right 2  | 0 | 0 | 0 | 0 |
| hugin-RG left 1   | 0 | 0 | 0 | 0 |
| hugin-RG left 2   | 0 | 0 | 0 | 0 |
| hugin-VNC right 1 | 0 | 0 | 0 | 0 |
| hugin-VNC right 2 | 0 | 0 | 0 | 0 |
| hugin-VNC left 1  | 0 | 0 | 0 | 0 |
| hugin-VNC left 2  | 0 | 0 | 0 | 0 |
| hugin-PH right 1  | 0 | 0 | 0 | 0 |
| hugin-PH right 2  | 0 | 0 | 0 | 0 |
| hugin-PH left 1   | 0 | 0 | 0 | 0 |
| hugin-PH left 2   | 0 | 0 | 0 | 0 |

# H AN sensory neurons - C1

1.

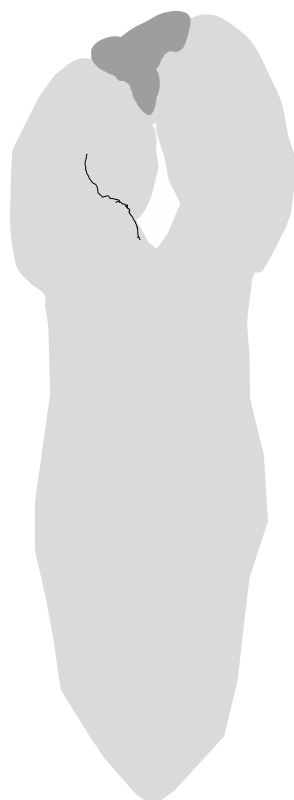

#1377586

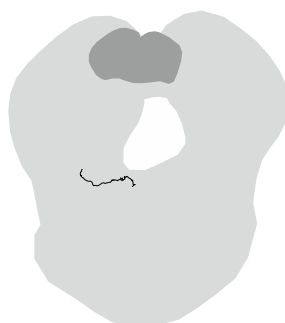

synapses to

synapses from

|                   |   |   |
|-------------------|---|---|
| hugin-PC right 1  | 0 | 0 |
| hugin-PC right 2  | 0 | 0 |
| hugin-PC right 3  | 0 | 0 |
| hugin-PC right 4  | 0 | 0 |
| hugin-PC left 1   | 0 | 0 |
| hugin-PC left 2   | 0 | 0 |
| hugin-PC left 3   | 0 | 0 |
| hugin-PC left 4   | 0 | 0 |
| hugin-RG right 1  | 0 | 0 |
| hugin-RG right 2  | 0 | 0 |
| hugin-RG left 1   | 0 | 0 |
| hugin-RG left 2   | 0 | 0 |
| hugin-VNC right 1 | 1 | 0 |
| hugin-VNC right 2 | 2 | 0 |
| hugin-VNC left 1  | 0 | 0 |
| hugin-VNC left 2  | 0 | 0 |
| hugin-PH right 1  | 0 | 0 |
| hugin-PH right 2  | 0 | 0 |
| hugin-PH left 1   | 0 | 0 |
| hugin-PH left 2   | 0 | 0 |

2.

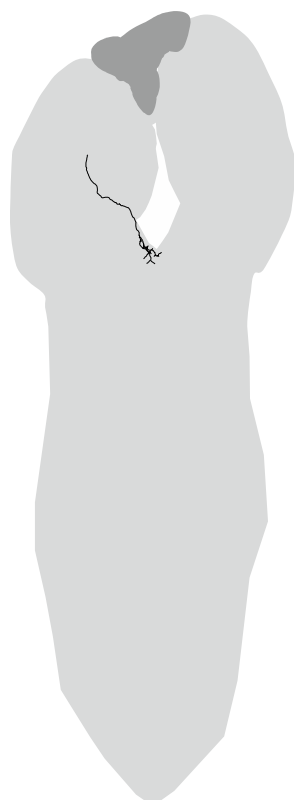

#15769419

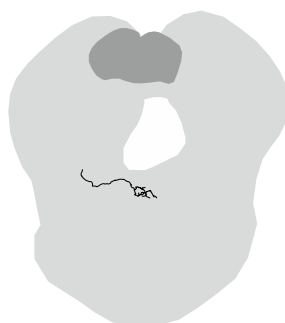

synapses to

synapses from

|                   |   |   |
|-------------------|---|---|
| hugin-PC right 1  | 0 | 0 |
| hugin-PC right 2  | 0 | 0 |
| hugin-PC right 3  | 0 | 0 |
| hugin-PC right 4  | 0 | 0 |
| hugin-PC left 1   | 0 | 0 |
| hugin-PC left 2   | 0 | 0 |
| hugin-PC left 3   | 1 | 0 |
| hugin-PC left 4   | 0 | 0 |
| hugin-RG right 1  | 0 | 0 |
| hugin-RG right 2  | 0 | 0 |
| hugin-RG left 1   | 0 | 0 |
| hugin-RG left 2   | 0 | 0 |
| hugin-VNC right 1 | 2 | 0 |
| hugin-VNC right 2 | 0 | 0 |
| hugin-VNC left 1  | 2 | 0 |
| hugin-VNC left 2  | 0 | 0 |
| hugin-PH right 1  | 0 | 0 |
| hugin-PH right 2  | 0 | 0 |
| hugin-PH left 1   | 0 | 0 |
| hugin-PH left 2   | 0 | 0 |

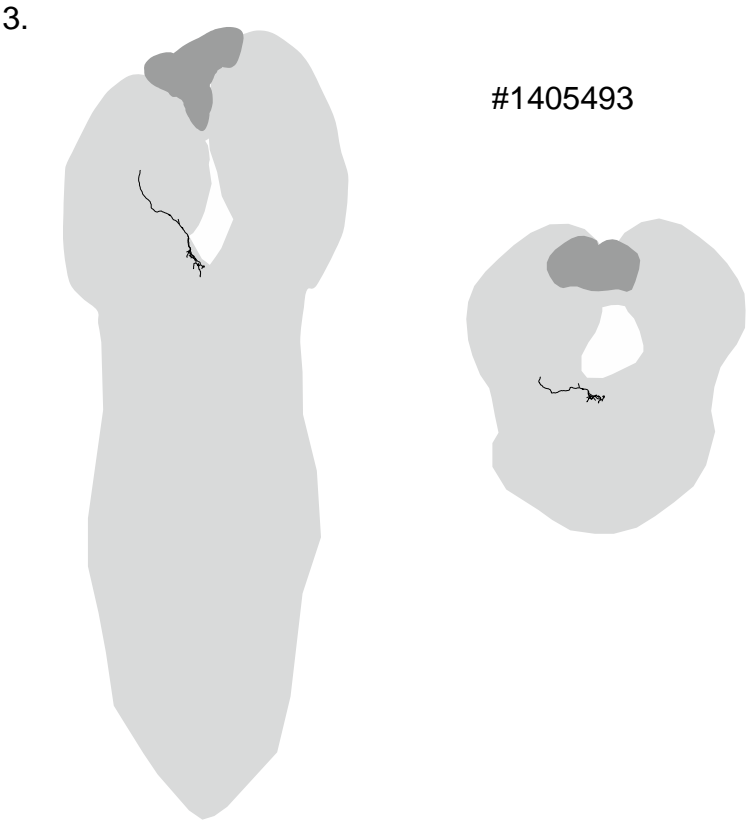

|                   | synapses to | synapses from |
|-------------------|-------------|---------------|
| hugin-PC right 1  | 0           | 0             |
| hugin-PC right 2  | 0           | 0             |
| hugin-PC right 3  | 0           | 0             |
| hugin-PC right 4  | 0           | 0             |
| hugin-PC left 1   | 1           | 0             |
| hugin-PC left 2   | 1           | 0             |
| hugin-PC left 3   | 0           | 0             |
| hugin-PC left 4   | 3           | 0             |
| hugin-RG right 1  | 0           | 0             |
| hugin-RG right 2  | 0           | 0             |
| hugin-RG left 1   | 0           | 0             |
| hugin-RG left 2   | 0           | 0             |
| hugin-VNC right 1 | 3           | 0             |
| hugin-VNC right 2 | 0           | 0             |
| hugin-VNC left 1  | 1           | 0             |
| hugin-VNC left 2  | 0           | 0             |
| hugin-PH right 1  | 0           | 0             |
| hugin-PH right 2  | 0           | 0             |
| hugin-PH left 1   | 0           | 0             |
| hugin-PH left 2   | 0           | 0             |

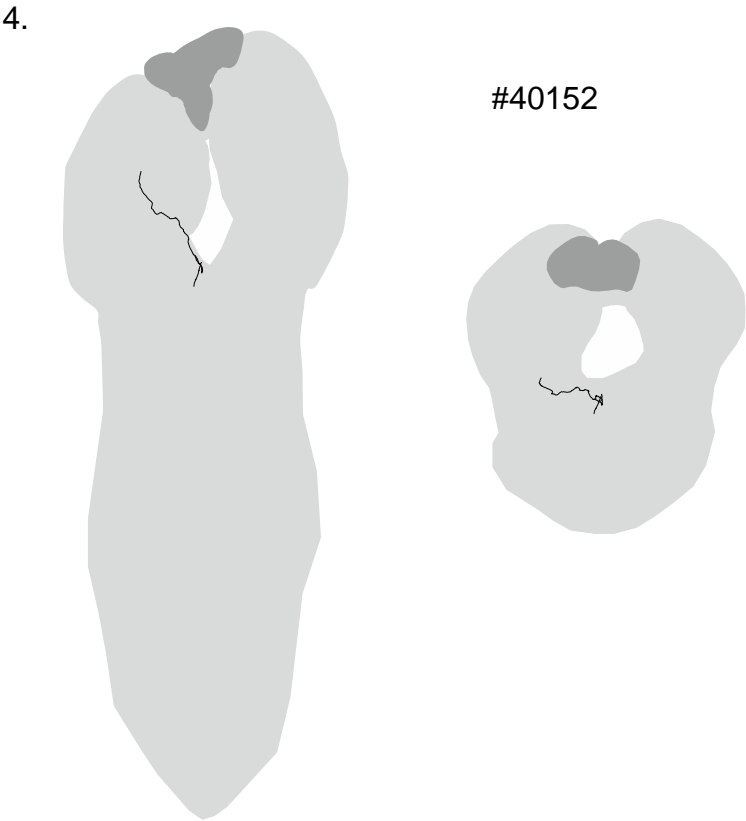

|                   | synapses to | synapses from |
|-------------------|-------------|---------------|
| hugin-PC right 1  | 0           | 0             |
| hugin-PC right 2  | 0           | 0             |
| hugin-PC right 3  | 0           | 0             |
| hugin-PC right 4  | 0           | 0             |
| hugin-PC left 1   | 2           | 0             |
| hugin-PC left 2   | 2           | 0             |
| hugin-PC left 3   | 2           | 0             |
| hugin-PC left 4   | 0           | 0             |
| hugin-RG right 1  | 0           | 0             |
| hugin-RG right 2  | 0           | 0             |
| hugin-RG left 1   | 0           | 0             |
| hugin-RG left 2   | 0           | 0             |
| hugin-VNC right 1 | 0           | 0             |
| hugin-VNC right 2 | 1           | 0             |
| hugin-VNC left 1  | 1           | 0             |
| hugin-VNC left 2  | 0           | 0             |
| hugin-PH right 1  | 0           | 0             |
| hugin-PH right 2  | 0           | 0             |
| hugin-PH left 1   | 0           | 0             |
| hugin-PH left 2   | 0           | 0             |

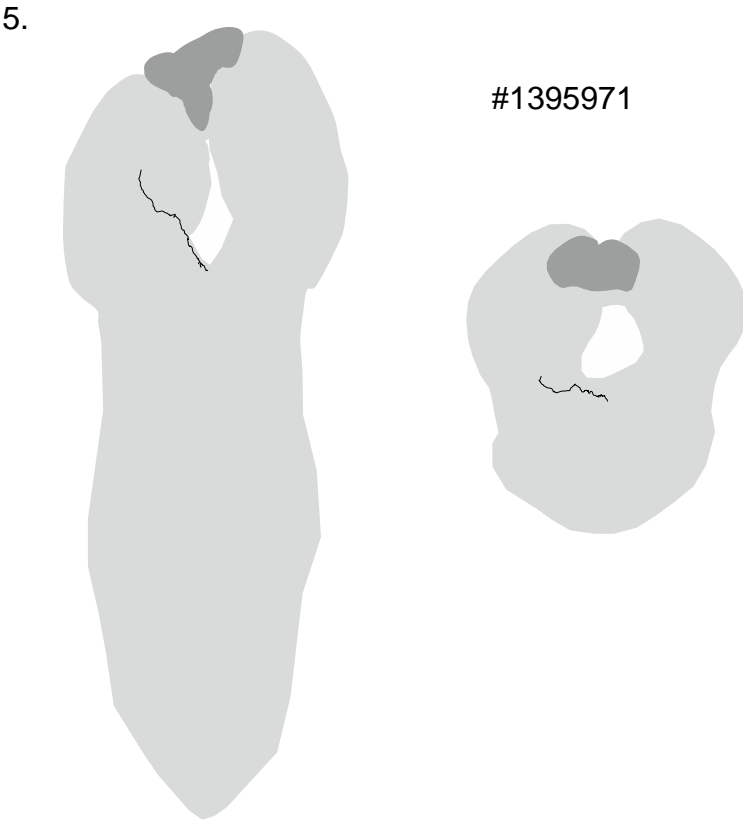

|                   | synapses to | synapses from |
|-------------------|-------------|---------------|
| hugin-PC right 1  | 0           | 0             |
| hugin-PC right 2  | 0           | 0             |
| hugin-PC right 3  | 0           | 0             |
| hugin-PC right 4  | 0           | 0             |
| hugin-PC left 1   | 0           | 0             |
| hugin-PC left 2   | 1           | 0             |
| hugin-PC left 3   | 2           | 0             |
| hugin-PC left 4   | 0           | 0             |
| hugin-RG right 1  | 0           | 0             |
| hugin-RG right 2  | 0           | 0             |
| hugin-RG left 1   | 0           | 0             |
| hugin-RG left 2   | 0           | 0             |
| hugin-VNC right 1 | 2           | 0             |
| hugin-VNC right 2 | 6           | 0             |
| hugin-VNC left 1  | 2           | 0             |
| hugin-VNC left 2  | 0           | 0             |
| hugin-PH right 1  | 0           | 0             |
| hugin-PH right 2  | 0           | 0             |
| hugin-PH left 1   | 0           | 0             |
| hugin-PH left 2   | 0           | 0             |

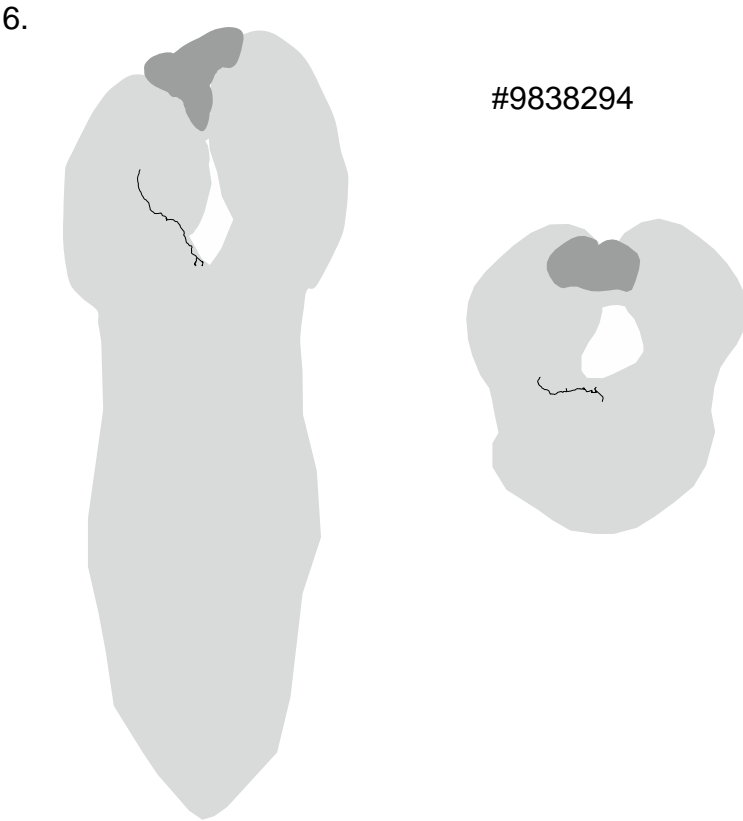

|                   | synapses to | synapses from |
|-------------------|-------------|---------------|
| hugin-PC right 1  | 0           | 0             |
| hugin-PC right 2  | 0           | 0             |
| hugin-PC right 3  | 0           | 0             |
| hugin-PC right 4  | 0           | 0             |
| hugin-PC left 1   | 0           | 0             |
| hugin-PC left 2   | 0           | 0             |
| hugin-PC left 3   | 0           | 0             |
| hugin-PC left 4   | 0           | 1             |
| hugin-RG right 1  | 0           | 0             |
| hugin-RG right 2  | 0           | 0             |
| hugin-RG left 1   | 0           | 0             |
| hugin-RG left 2   | 0           | 0             |
| hugin-VNC right 1 | 2           | 0             |
| hugin-VNC right 2 | 0           | 0             |
| hugin-VNC left 1  | 1           | 0             |
| hugin-VNC left 2  | 0           | 0             |
| hugin-PH right 1  | 0           | 0             |
| hugin-PH right 2  | 0           | 0             |
| hugin-PH left 1   | 0           | 0             |
| hugin-PH left 2   | 0           | 0             |

7.

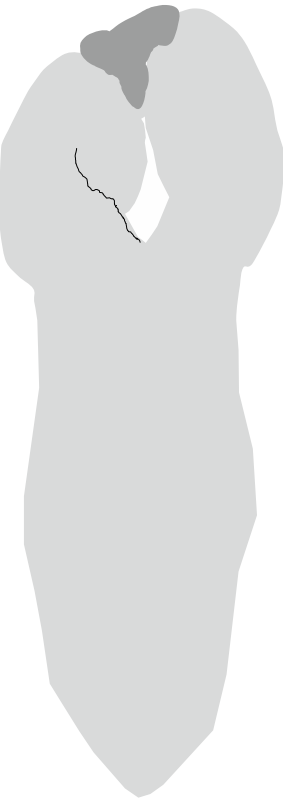

#1406463

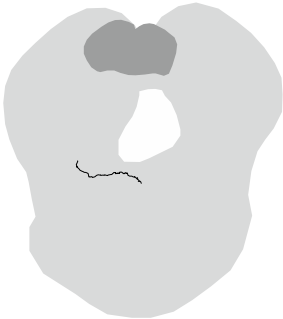

synapses to      synapses from

|                   |   |   |
|-------------------|---|---|
| hugin-PC right 1  | 0 | 0 |
| hugin-PC right 2  | 0 | 0 |
| hugin-PC right 3  | 0 | 0 |
| hugin-PC right 4  | 0 | 0 |
| hugin-PC left 1   | 0 | 0 |
| hugin-PC left 2   | 0 | 0 |
| hugin-PC left 3   | 0 | 0 |
| hugin-PC left 4   | 1 | 0 |
| hugin-RG right 1  | 0 | 0 |
| hugin-RG right 2  | 0 | 0 |
| hugin-RG left 1   | 0 | 0 |
| hugin-RG left 2   | 0 | 0 |
| hugin-VNC right 1 | 1 | 0 |
| hugin-VNC right 2 | 0 | 0 |
| hugin-VNC left 1  | 0 | 0 |
| hugin-VNC left 2  | 0 | 0 |
| hugin-PH right 1  | 0 | 0 |
| hugin-PH right 2  | 0 | 0 |
| hugin-PH left 1   | 0 | 0 |
| hugin-PH left 2   | 0 | 0 |

8.

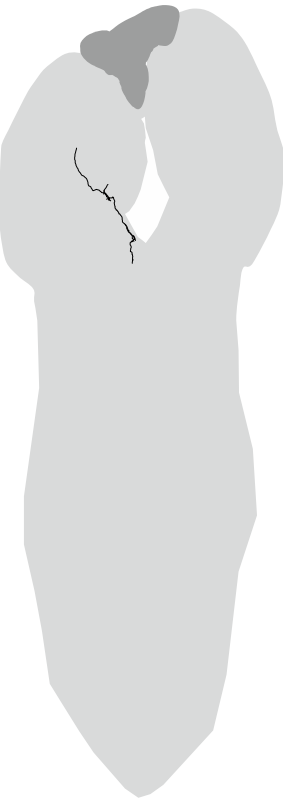

#1398253

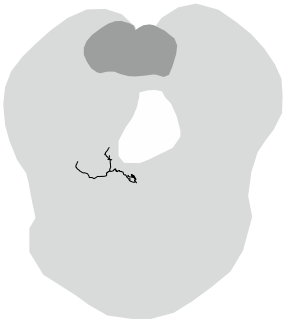

synapses to      synapses from

|                   |   |   |
|-------------------|---|---|
| hugin-PC right 1  | 0 | 0 |
| hugin-PC right 2  | 0 | 0 |
| hugin-PC right 3  | 0 | 0 |
| hugin-PC right 4  | 0 | 0 |
| hugin-PC left 1   | 0 | 0 |
| hugin-PC left 2   | 0 | 0 |
| hugin-PC left 3   | 0 | 0 |
| hugin-PC left 4   | 0 | 0 |
| hugin-RG right 1  | 0 | 0 |
| hugin-RG right 2  | 0 | 0 |
| hugin-RG left 1   | 0 | 0 |
| hugin-RG left 2   | 0 | 0 |
| hugin-VNC right 1 | 2 | 1 |
| hugin-VNC right 2 | 0 | 0 |
| hugin-VNC left 1  | 1 | 0 |
| hugin-VNC left 2  | 0 | 0 |
| hugin-PH right 1  | 0 | 0 |
| hugin-PH right 2  | 0 | 0 |
| hugin-PH left 1   | 0 | 0 |
| hugin-PH left 2   | 0 | 0 |



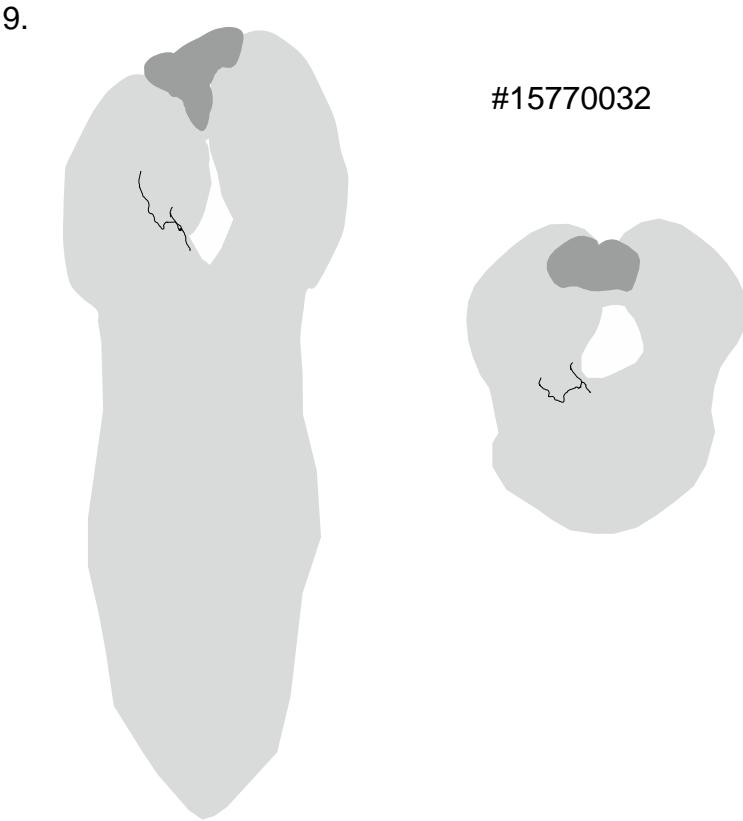

|                   | synapses to | synapses from |
|-------------------|-------------|---------------|
| hugin-PC right 1  | 0           | 0             |
| hugin-PC right 2  | 0           | 0             |
| hugin-PC right 3  | 0           | 0             |
| hugin-PC right 4  | 0           | 0             |
| hugin-PC left 1   | 0           | 0             |
| hugin-PC left 2   | 0           | 0             |
| hugin-PC left 3   | 0           | 0             |
| hugin-PC left 4   | 0           | 0             |
| hugin-RG right 1  | 0           | 0             |
| hugin-RG right 2  | 0           | 0             |
| hugin-RG left 1   | 0           | 0             |
| hugin-RG left 2   | 0           | 0             |
| hugin-VNC right 1 | 0           | 0             |
| hugin-VNC right 2 | 2           | 0             |
| hugin-VNC left 1  | 0           | 0             |
| hugin-VNC left 2  | 0           | 0             |
| hugin-PH right 1  | 0           | 0             |
| hugin-PH right 2  | 0           | 0             |
| hugin-PH left 1   | 0           | 0             |
| hugin-PH left 2   | 0           | 0             |

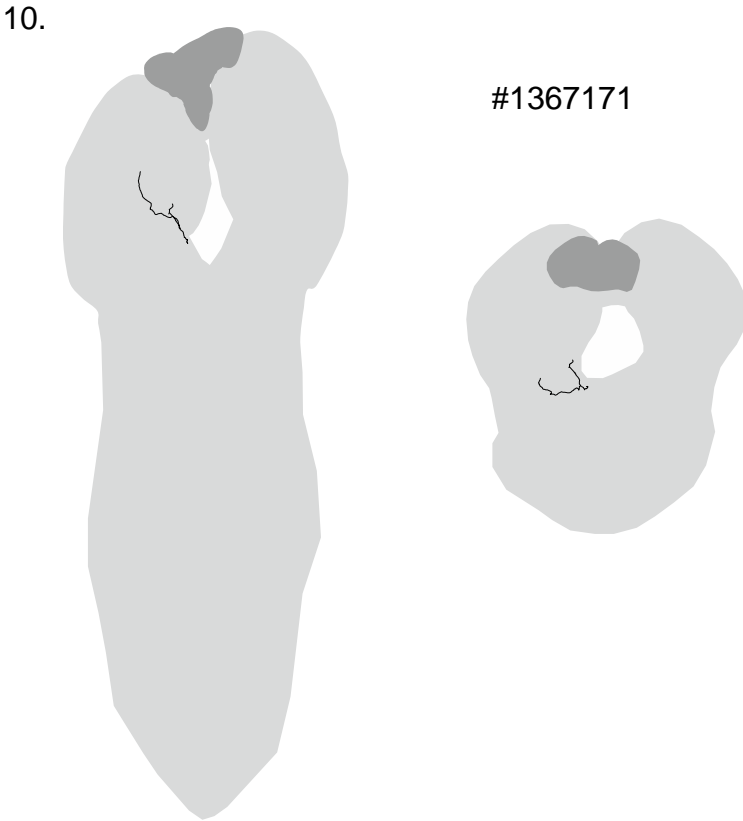

|                   | synapses to | synapses from |
|-------------------|-------------|---------------|
| hugin-PC right 1  | 0           | 0             |
| hugin-PC right 2  | 0           | 0             |
| hugin-PC right 3  | 0           | 0             |
| hugin-PC right 4  | 0           | 0             |
| hugin-PC left 1   | 0           | 0             |
| hugin-PC left 2   | 0           | 0             |
| hugin-PC left 3   | 0           | 0             |
| hugin-PC left 4   | 0           | 0             |
| hugin-RG right 1  | 0           | 0             |
| hugin-RG right 2  | 0           | 0             |
| hugin-RG left 1   | 0           | 0             |
| hugin-RG left 2   | 0           | 0             |
| hugin-VNC right 1 | 3           | 0             |
| hugin-VNC right 2 | 1           | 0             |
| hugin-VNC left 1  | 3           | 0             |
| hugin-VNC left 2  | 0           | 0             |
| hugin-PH right 1  | 0           | 0             |
| hugin-PH right 2  | 0           | 0             |
| hugin-PH left 1   | 0           | 0             |
| hugin-PH left 2   | 0           | 0             |

11.

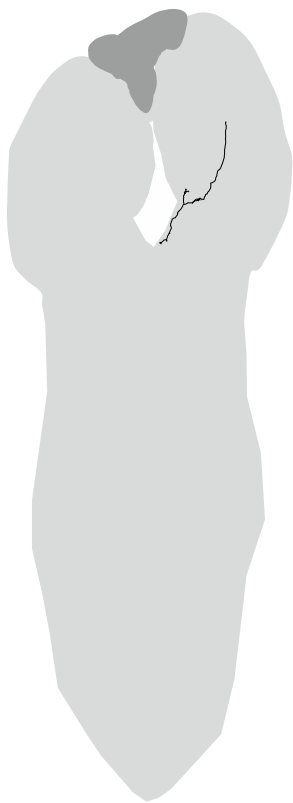

#15562137

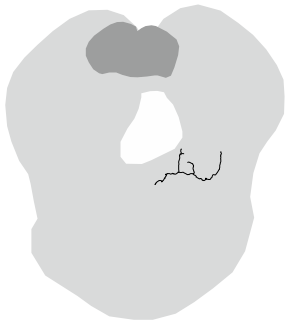

synapses to

synapses from

|                   |   |   |
|-------------------|---|---|
| hugin-PC right 1  | 0 | 0 |
| hugin-PC right 2  | 0 | 0 |
| hugin-PC right 3  | 1 | 0 |
| hugin-PC right 4  | 0 | 0 |
| hugin-PC left 1   | 0 | 0 |
| hugin-PC left 2   | 0 | 0 |
| hugin-PC left 3   | 0 | 0 |
| hugin-PC left 4   | 0 | 0 |
| hugin-RG right 1  | 0 | 0 |
| hugin-RG right 2  | 0 | 0 |
| hugin-RG left 1   | 0 | 0 |
| hugin-RG left 2   | 0 | 0 |
| hugin-VNC right 1 | 0 | 0 |
| hugin-VNC right 2 | 0 | 0 |
| hugin-VNC left 1  | 0 | 0 |
| hugin-VNC left 2  | 1 | 0 |
| hugin-PH right 1  | 0 | 0 |
| hugin-PH right 2  | 0 | 0 |
| hugin-PH left 1   | 0 | 0 |
| hugin-PH left 2   | 0 | 0 |

12.

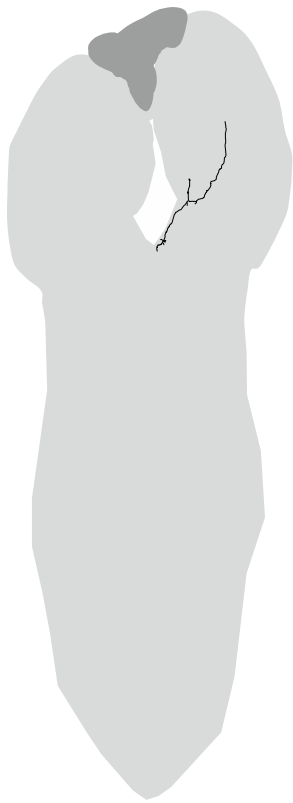

#15574231

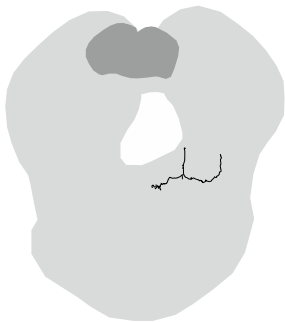

synapses to

synapses from

|                   |   |   |
|-------------------|---|---|
| hugin-PC right 1  | 1 | 1 |
| hugin-PC right 2  | 5 | 0 |
| hugin-PC right 3  | 0 | 0 |
| hugin-PC right 4  | 2 | 0 |
| hugin-PC left 1   | 0 | 0 |
| hugin-PC left 2   | 0 | 0 |
| hugin-PC left 3   | 0 | 0 |
| hugin-PC left 4   | 0 | 0 |
| hugin-RG right 1  | 0 | 0 |
| hugin-RG right 2  | 0 | 0 |
| hugin-RG left 1   | 0 | 0 |
| hugin-RG left 2   | 0 | 0 |
| hugin-VNC right 1 | 0 | 0 |
| hugin-VNC right 2 | 0 | 0 |
| hugin-VNC left 1  | 0 | 0 |
| hugin-VNC left 2  | 0 | 0 |
| hugin-PH right 1  | 0 | 0 |
| hugin-PH right 2  | 0 | 0 |
| hugin-PH left 1   | 0 | 0 |
| hugin-PH left 2   | 0 | 0 |

13.

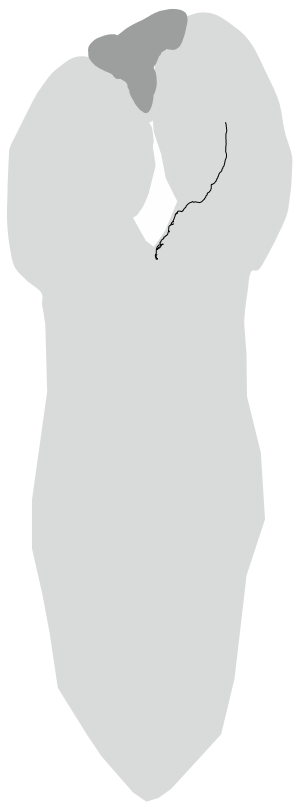

#15573396

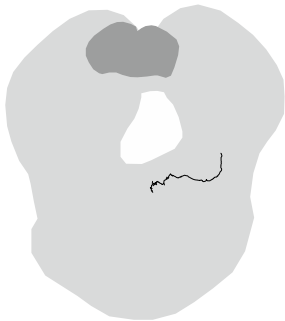

synapses to

synapses from

|                   |   |   |
|-------------------|---|---|
| hugin-PC right 1  | 3 | 0 |
| hugin-PC right 2  | 0 | 0 |
| hugin-PC right 3  | 0 | 0 |
| hugin-PC right 4  | 0 | 0 |
| hugin-PC left 1   | 0 | 0 |
| hugin-PC left 2   | 0 | 0 |
| hugin-PC left 3   | 0 | 0 |
| hugin-PC left 4   | 0 | 0 |
| hugin-RG right 1  | 0 | 0 |
| hugin-RG right 2  | 0 | 0 |
| hugin-RG left 1   | 0 | 0 |
| hugin-RG left 2   | 0 | 0 |
| hugin-VNC right 1 | 0 | 0 |
| hugin-VNC right 2 | 0 | 0 |
| hugin-VNC left 1  | 0 | 0 |
| hugin-VNC left 2  | 2 | 0 |
| hugin-PH right 1  | 0 | 0 |
| hugin-PH right 2  | 0 | 0 |
| hugin-PH left 1   | 0 | 0 |
| hugin-PH left 2   | 0 | 0 |

14.

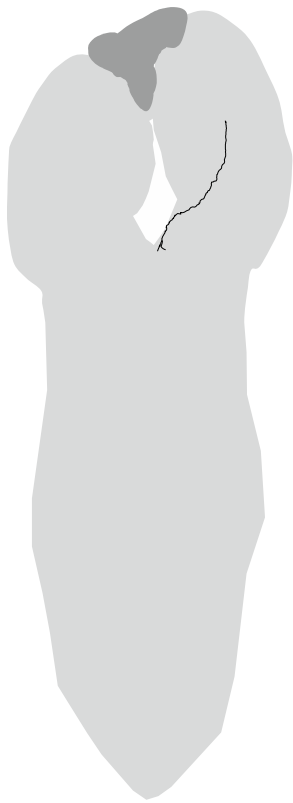

#15573450

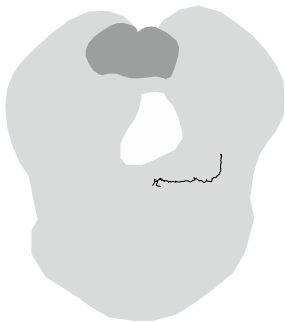

synapses to

synapses from

|                   |   |   |
|-------------------|---|---|
| hugin-PC right 1  | 0 | 0 |
| hugin-PC right 2  | 0 | 0 |
| hugin-PC right 3  | 0 | 0 |
| hugin-PC right 4  | 0 | 0 |
| hugin-PC left 1   | 0 | 0 |
| hugin-PC left 2   | 0 | 0 |
| hugin-PC left 3   | 0 | 0 |
| hugin-PC left 4   | 0 | 0 |
| hugin-RG right 1  | 0 | 0 |
| hugin-RG right 2  | 0 | 0 |
| hugin-RG left 1   | 0 | 0 |
| hugin-RG left 2   | 0 | 0 |
| hugin-VNC right 1 | 0 | 0 |
| hugin-VNC right 2 | 0 | 0 |
| hugin-VNC left 1  | 0 | 0 |
| hugin-VNC left 2  | 2 | 0 |
| hugin-PH right 1  | 0 | 0 |
| hugin-PH right 2  | 0 | 0 |
| hugin-PH left 1   | 0 | 0 |
| hugin-PH left 2   | 0 | 0 |

## AN sensory neurons - C2

1.

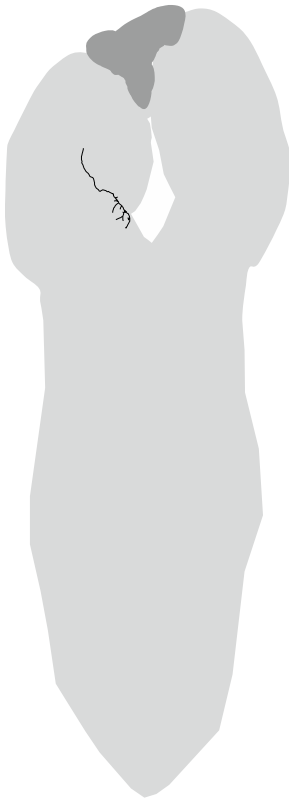

#1375101

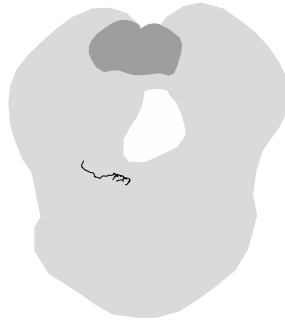

synapses to

synapses from

|                   |   |   |
|-------------------|---|---|
| hugin-PC right 1  | 0 | 0 |
| hugin-PC right 2  | 0 | 0 |
| hugin-PC right 3  | 0 | 0 |
| hugin-PC right 4  | 0 | 0 |
| hugin-PC left 1   | 0 | 0 |
| hugin-PC left 2   | 0 | 0 |
| hugin-PC left 3   | 0 | 0 |
| hugin-PC left 4   | 2 | 0 |
| hugin-RG right 1  | 0 | 0 |
| hugin-RG right 2  | 0 | 0 |
| hugin-RG left 1   | 0 | 0 |
| hugin-RG left 2   | 0 | 0 |
| hugin-VNC right 1 | 0 | 0 |
| hugin-VNC right 2 | 0 | 0 |
| hugin-VNC left 1  | 0 | 0 |
| hugin-VNC left 2  | 0 | 0 |
| hugin-PH right 1  | 0 | 0 |
| hugin-PH right 2  | 0 | 0 |
| hugin-PH left 1   | 0 | 0 |
| hugin-PH left 2   | 0 | 0 |

2.

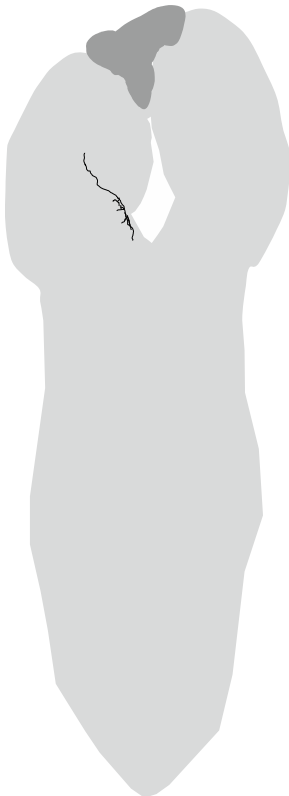

#1435466

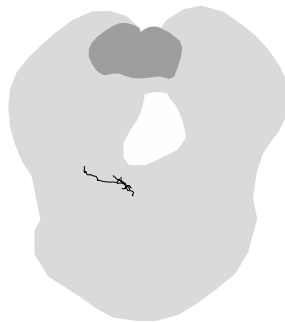

synapses to

synapses from

|                   |   |   |
|-------------------|---|---|
| hugin-PC right 1  | 0 | 0 |
| hugin-PC right 2  | 0 | 0 |
| hugin-PC right 3  | 0 | 0 |
| hugin-PC right 4  | 0 | 0 |
| hugin-PC left 1   | 3 | 0 |
| hugin-PC left 2   | 1 | 0 |
| hugin-PC left 3   | 2 | 0 |
| hugin-PC left 4   | 0 | 0 |
| hugin-RG right 1  | 0 | 0 |
| hugin-RG right 2  | 0 | 0 |
| hugin-RG left 1   | 0 | 0 |
| hugin-RG left 2   | 0 | 0 |
| hugin-VNC right 1 | 0 | 0 |
| hugin-VNC right 2 | 1 | 0 |
| hugin-VNC left 1  | 0 | 0 |
| hugin-VNC left 2  | 0 | 0 |
| hugin-PH right 1  | 0 | 0 |
| hugin-PH right 2  | 0 | 0 |
| hugin-PH left 1   | 0 | 0 |
| hugin-PH left 2   | 0 | 0 |

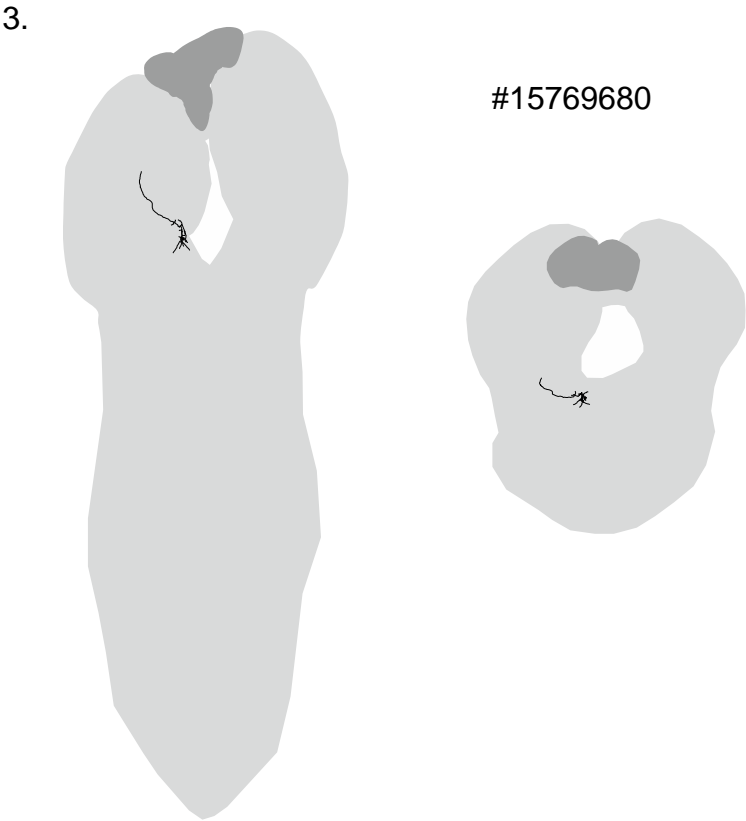

|                   | synapses to | synapses from |
|-------------------|-------------|---------------|
| hugin-PC right 1  | 0           | 0             |
| hugin-PC right 2  | 0           | 0             |
| hugin-PC right 3  | 0           | 0             |
| hugin-PC right 4  | 0           | 0             |
| hugin-PC left 1   | 1           | 0             |
| hugin-PC left 2   | 0           | 0             |
| hugin-PC left 3   | 2           | 0             |
| hugin-PC left 4   | 2           | 0             |
| hugin-RG right 1  | 0           | 0             |
| hugin-RG right 2  | 0           | 0             |
| hugin-RG left 1   | 0           | 0             |
| hugin-RG left 2   | 0           | 0             |
| hugin-VNC right 1 | 0           | 0             |
| hugin-VNC right 2 | 0           | 0             |
| hugin-VNC left 1  | 0           | 0             |
| hugin-VNC left 2  | 0           | 0             |
| hugin-PH right 1  | 0           | 0             |
| hugin-PH right 2  | 0           | 0             |
| hugin-PH left 1   | 0           | 0             |
| hugin-PH left 2   | 0           | 0             |

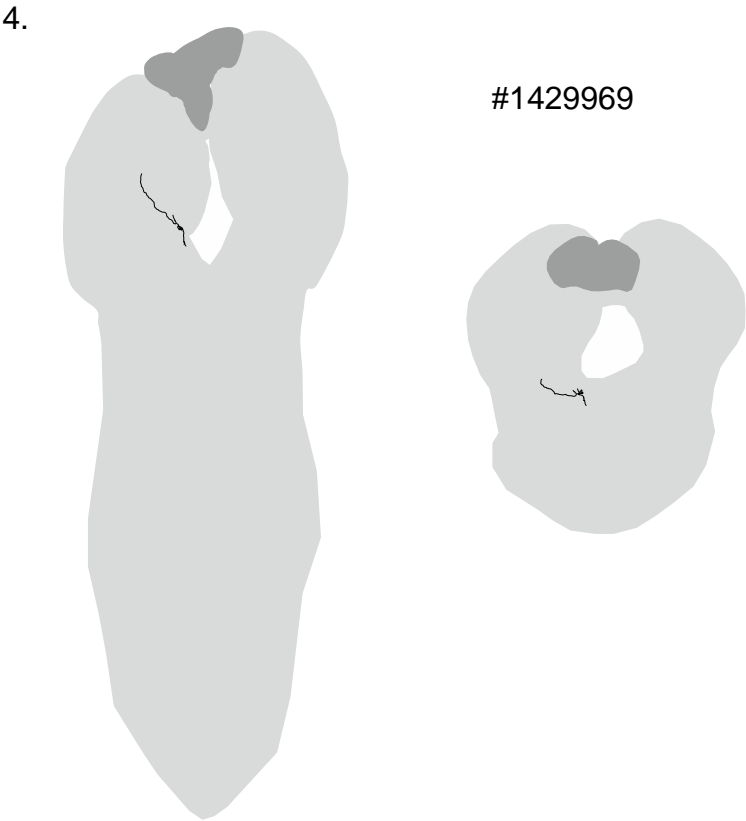

|                   | synapses to | synapses from |
|-------------------|-------------|---------------|
| hugin-PC right 1  | 0           | 0             |
| hugin-PC right 2  | 0           | 0             |
| hugin-PC right 3  | 0           | 0             |
| hugin-PC right 4  | 0           | 0             |
| hugin-PC left 1   | 0           | 0             |
| hugin-PC left 2   | 1           | 0             |
| hugin-PC left 3   | 2           | 0             |
| hugin-PC left 4   | 1           | 0             |
| hugin-RG right 1  | 0           | 0             |
| hugin-RG right 2  | 0           | 0             |
| hugin-RG left 1   | 0           | 0             |
| hugin-RG left 2   | 0           | 0             |
| hugin-VNC right 1 | 0           | 0             |
| hugin-VNC right 2 | 0           | 0             |
| hugin-VNC left 1  | 0           | 0             |
| hugin-VNC left 2  | 0           | 0             |
| hugin-PH right 1  | 0           | 0             |
| hugin-PH right 2  | 0           | 0             |
| hugin-PH left 1   | 0           | 0             |
| hugin-PH left 2   | 0           | 0             |

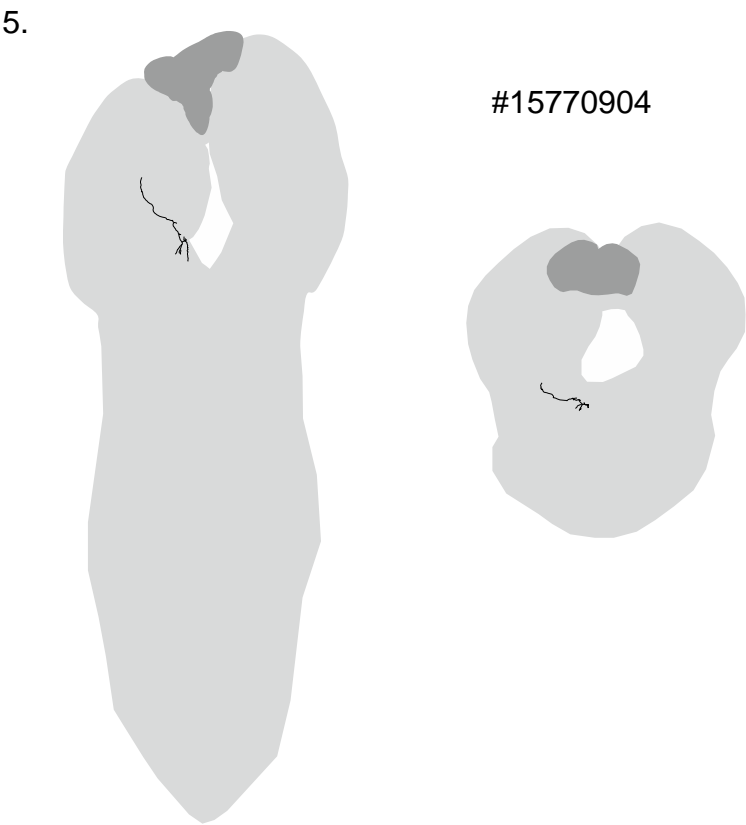

|                   | synapses to | synapses from |
|-------------------|-------------|---------------|
| hugin-PC right 1  | 0           | 0             |
| hugin-PC right 2  | 0           | 0             |
| hugin-PC right 3  | 0           | 0             |
| hugin-PC right 4  | 0           | 0             |
| hugin-PC left 1   | 1           | 0             |
| hugin-PC left 2   | 0           | 0             |
| hugin-PC left 3   | 2           | 0             |
| hugin-PC left 4   | 1           | 0             |
| hugin-RG right 1  | 0           | 0             |
| hugin-RG right 2  | 0           | 0             |
| hugin-RG left 1   | 0           | 0             |
| hugin-RG left 2   | 0           | 0             |
| hugin-VNC right 1 | 0           | 0             |
| hugin-VNC right 2 | 0           | 0             |
| hugin-VNC left 1  | 0           | 0             |
| hugin-VNC left 2  | 0           | 0             |
| hugin-PH right 1  | 0           | 0             |
| hugin-PH right 2  | 0           | 0             |
| hugin-PH left 1   | 0           | 0             |
| hugin-PH left 2   | 0           | 0             |

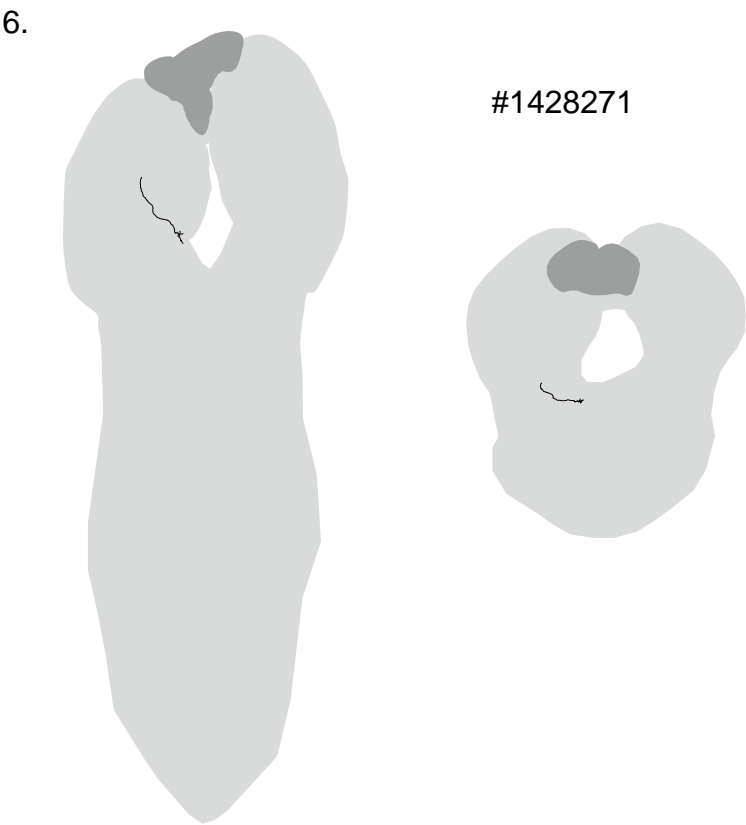

|                   | synapses to | synapses from |
|-------------------|-------------|---------------|
| hugin-PC right 1  | 0           | 0             |
| hugin-PC right 2  | 0           | 0             |
| hugin-PC right 3  | 0           | 0             |
| hugin-PC right 4  | 0           | 0             |
| hugin-PC left 1   | 4           | 0             |
| hugin-PC left 2   | 0           | 0             |
| hugin-PC left 3   | 0           | 0             |
| hugin-PC left 4   | 1           | 0             |
| hugin-RG right 1  | 0           | 0             |
| hugin-RG right 2  | 0           | 0             |
| hugin-RG left 1   | 0           | 0             |
| hugin-RG left 2   | 0           | 0             |
| hugin-VNC right 1 | 0           | 0             |
| hugin-VNC right 2 | 1           | 0             |
| hugin-VNC left 1  | 0           | 0             |
| hugin-VNC left 2  | 0           | 0             |
| hugin-PH right 1  | 0           | 0             |
| hugin-PH right 2  | 0           | 0             |
| hugin-PH left 1   | 0           | 0             |
| hugin-PH left 2   | 0           | 0             |

7.

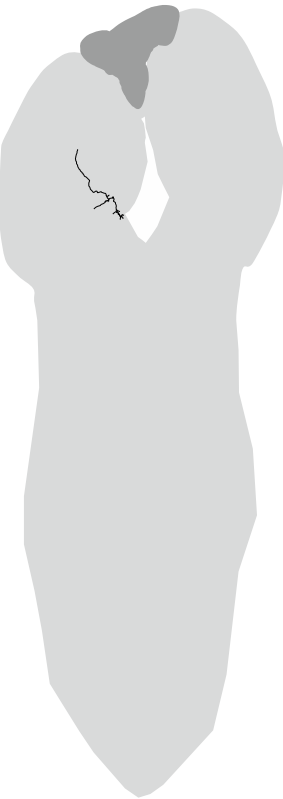

#1414206

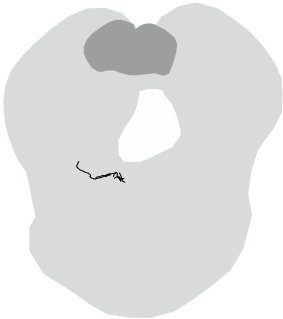

synapses to      synapses from

|                   |   |   |
|-------------------|---|---|
| hugin-PC right 1  | 0 | 0 |
| hugin-PC right 2  | 0 | 0 |
| hugin-PC right 3  | 0 | 0 |
| hugin-PC right 4  | 0 | 0 |
| hugin-PC left 1   | 0 | 0 |
| hugin-PC left 2   | 0 | 0 |
| hugin-PC left 3   | 0 | 0 |
| hugin-PC left 4   | 0 | 2 |
| hugin-RG right 1  | 0 | 0 |
| hugin-RG right 2  | 0 | 0 |
| hugin-RG left 1   | 0 | 0 |
| hugin-RG left 2   | 0 | 0 |
| hugin-VNC right 1 | 0 | 0 |
| hugin-VNC right 2 | 2 | 0 |
| hugin-VNC left 1  | 0 | 0 |
| hugin-VNC left 2  | 0 | 0 |
| hugin-PH right 1  | 0 | 0 |
| hugin-PH right 2  | 0 | 0 |
| hugin-PH left 1   | 0 | 0 |
| hugin-PH left 2   | 0 | 0 |

8.

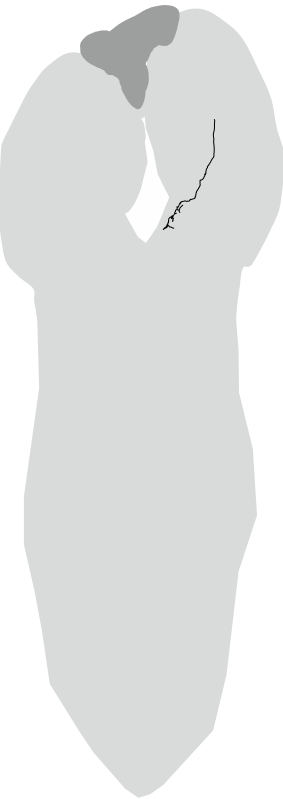

#15575327

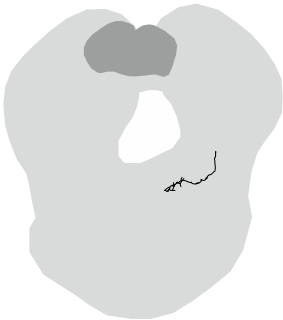

synapses to      synapses from

|                   |   |   |
|-------------------|---|---|
| hugin-PC right 1  | 3 | 0 |
| hugin-PC right 2  | 2 | 0 |
| hugin-PC right 3  | 1 | 0 |
| hugin-PC right 4  | 0 | 0 |
| hugin-PC left 1   | 0 | 0 |
| hugin-PC left 2   | 0 | 0 |
| hugin-PC left 3   | 0 | 0 |
| hugin-PC left 4   | 0 | 0 |
| hugin-RG right 1  | 0 | 0 |
| hugin-RG right 2  | 0 | 0 |
| hugin-RG left 1   | 0 | 0 |
| hugin-RG left 2   | 0 | 0 |
| hugin-VNC right 1 | 0 | 0 |
| hugin-VNC right 2 | 0 | 0 |
| hugin-VNC left 1  | 0 | 0 |
| hugin-VNC left 2  | 0 | 0 |
| hugin-PH right 1  | 0 | 0 |
| hugin-PH right 2  | 0 | 0 |
| hugin-PH left 1   | 0 | 0 |
| hugin-PH left 2   | 0 | 0 |

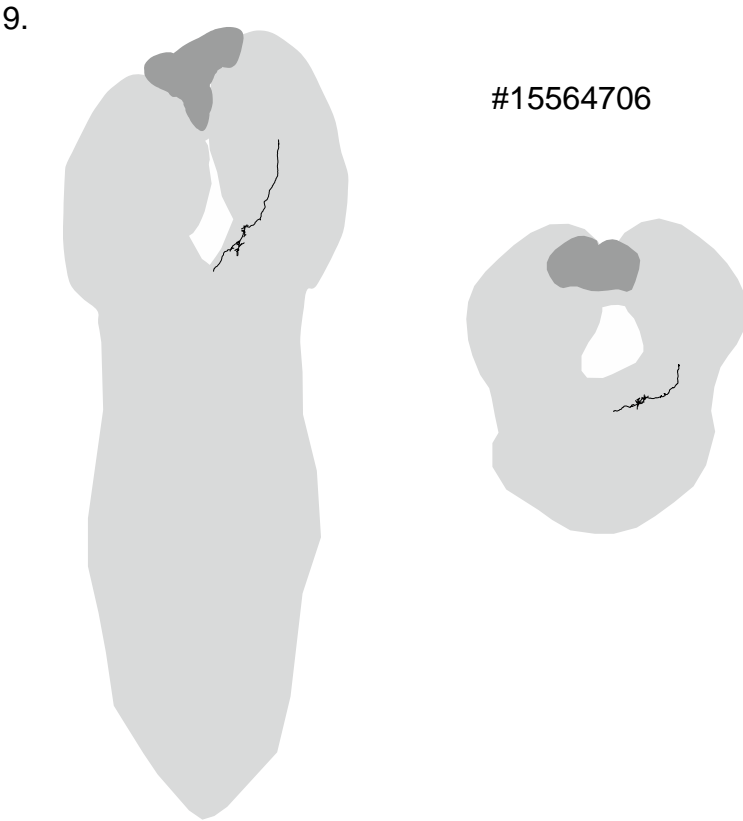

|                   | synapses to | synapses from |
|-------------------|-------------|---------------|
| hugin-PC right 1  | 0           | 0             |
| hugin-PC right 2  | 1           | 0             |
| hugin-PC right 3  | 1           | 0             |
| hugin-PC right 4  | 1           | 0             |
| hugin-PC left 1   | 0           | 0             |
| hugin-PC left 2   | 0           | 0             |
| hugin-PC left 3   | 0           | 0             |
| hugin-PC left 4   | 0           | 0             |
| hugin-RG right 1  | 0           | 0             |
| hugin-RG right 2  | 0           | 0             |
| hugin-RG left 1   | 0           | 0             |
| hugin-RG left 2   | 0           | 0             |
| hugin-VNC right 1 | 0           | 0             |
| hugin-VNC right 2 | 0           | 0             |
| hugin-VNC left 1  | 0           | 0             |
| hugin-VNC left 2  | 0           | 0             |
| hugin-PH right 1  | 0           | 0             |
| hugin-PH right 2  | 0           | 0             |
| hugin-PH left 1   | 0           | 0             |
| hugin-PH left 2   | 0           | 0             |

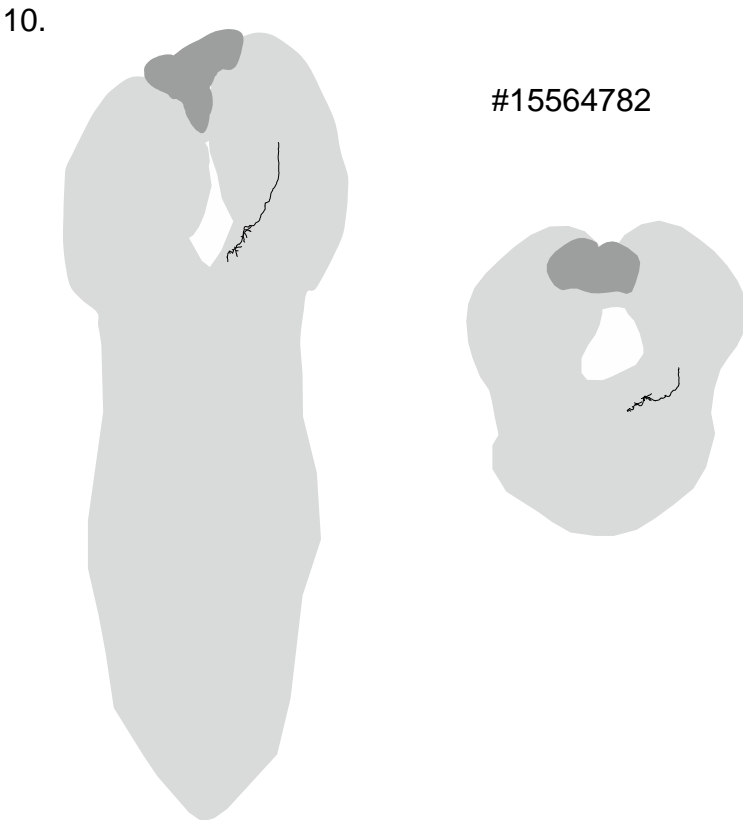

|                   | synapses to | synapses from |
|-------------------|-------------|---------------|
| hugin-PC right 1  | 3           | 0             |
| hugin-PC right 2  | 0           | 0             |
| hugin-PC right 3  | 0           | 0             |
| hugin-PC right 4  | 0           | 0             |
| hugin-PC left 1   | 0           | 0             |
| hugin-PC left 2   | 0           | 0             |
| hugin-PC left 3   | 0           | 0             |
| hugin-PC left 4   | 0           | 0             |
| hugin-RG right 1  | 0           | 0             |
| hugin-RG right 2  | 0           | 0             |
| hugin-RG left 1   | 0           | 0             |
| hugin-RG left 2   | 0           | 0             |
| hugin-VNC right 1 | 0           | 0             |
| hugin-VNC right 2 | 0           | 0             |
| hugin-VNC left 1  | 0           | 0             |
| hugin-VNC left 2  | 0           | 0             |
| hugin-PH right 1  | 0           | 0             |
| hugin-PH right 2  | 0           | 0             |
| hugin-PH left 1   | 0           | 0             |
| hugin-PH left 2   | 0           | 0             |



11.

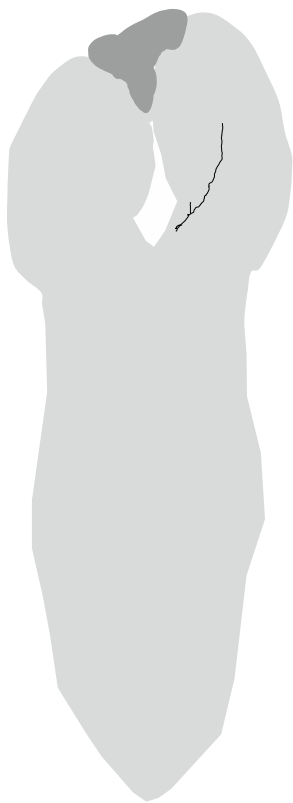

#15572414

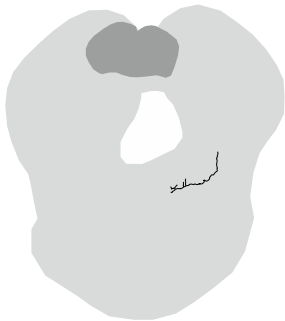

synapses to

synapses from

|                   |   |   |
|-------------------|---|---|
| hugin-PC right 1  | 1 | 0 |
| hugin-PC right 2  | 1 | 0 |
| hugin-PC right 3  | 0 | 0 |
| hugin-PC right 4  | 0 | 0 |
| hugin-PC left 1   | 0 | 0 |
| hugin-PC left 2   | 0 | 0 |
| hugin-PC left 3   | 0 | 0 |
| hugin-PC left 4   | 0 | 0 |
| hugin-RG right 1  | 0 | 0 |
| hugin-RG right 2  | 0 | 0 |
| hugin-RG left 1   | 0 | 0 |
| hugin-RG left 2   | 0 | 0 |
| hugin-VNC right 1 | 0 | 0 |
| hugin-VNC right 2 | 0 | 0 |
| hugin-VNC left 1  | 0 | 0 |
| hugin-VNC left 2  | 0 | 0 |
| hugin-PH right 1  | 0 | 0 |
| hugin-PH right 2  | 0 | 0 |
| hugin-PH left 1   | 0 | 0 |
| hugin-PH left 2   | 0 | 0 |

12.

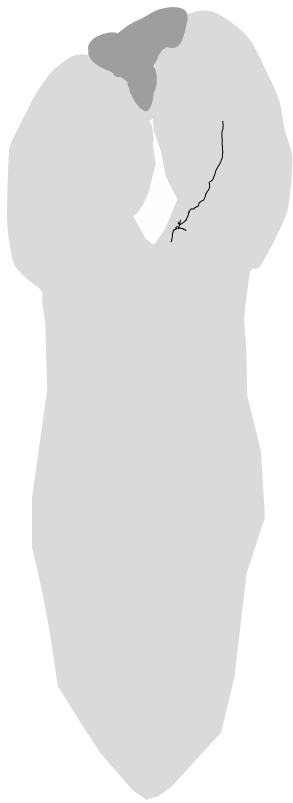

#15564807

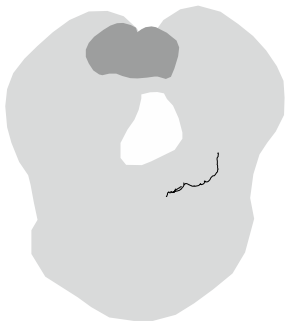

synapses to

synapses from

|                   |   |   |
|-------------------|---|---|
| hugin-PC right 1  | 2 | 0 |
| hugin-PC right 2  | 1 | 0 |
| hugin-PC right 3  | 3 | 0 |
| hugin-PC right 4  | 0 | 0 |
| hugin-PC left 1   | 0 | 0 |
| hugin-PC left 2   | 0 | 0 |
| hugin-PC left 3   | 0 | 0 |
| hugin-PC left 4   | 0 | 0 |
| hugin-RG right 1  | 0 | 0 |
| hugin-RG right 2  | 0 | 0 |
| hugin-RG left 1   | 0 | 0 |
| hugin-RG left 2   | 0 | 0 |
| hugin-VNC right 1 | 0 | 0 |
| hugin-VNC right 2 | 0 | 0 |
| hugin-VNC left 1  | 0 | 0 |
| hugin-VNC left 2  | 0 | 0 |
| hugin-PH right 1  | 0 | 0 |
| hugin-PH right 2  | 0 | 0 |
| hugin-PH left 1   | 0 | 0 |
| hugin-PH left 2   | 0 | 0 |

13.

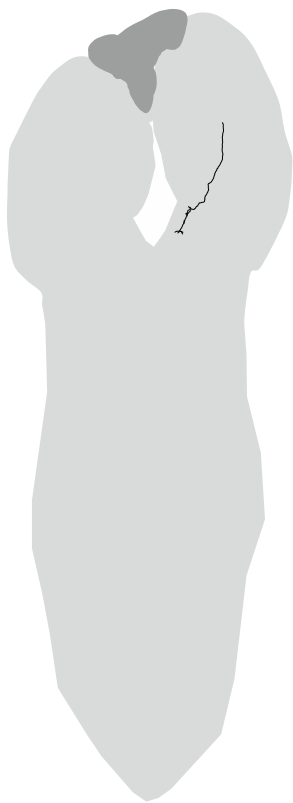

#15543068

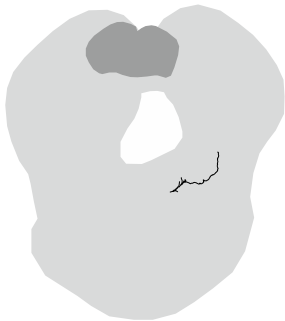

synapses to

synapses from

|                   |   |   |
|-------------------|---|---|
| hugin-PC right 1  | 1 | 0 |
| hugin-PC right 2  | 0 | 0 |
| hugin-PC right 3  | 2 | 0 |
| hugin-PC right 4  | 1 | 0 |
| hugin-PC left 1   | 0 | 0 |
| hugin-PC left 2   | 0 | 0 |
| hugin-PC left 3   | 0 | 0 |
| hugin-PC left 4   | 0 | 0 |
| hugin-RG right 1  | 0 | 0 |
| hugin-RG right 2  | 0 | 0 |
| hugin-RG left 1   | 0 | 0 |
| hugin-RG left 2   | 0 | 0 |
| hugin-VNC right 1 | 0 | 0 |
| hugin-VNC right 2 | 0 | 0 |
| hugin-VNC left 1  | 0 | 0 |
| hugin-VNC left 2  | 0 | 0 |
| hugin-PH right 1  | 0 | 0 |
| hugin-PH right 2  | 0 | 0 |
| hugin-PH left 1   | 0 | 0 |
| hugin-PH left 2   | 0 | 0 |

14.

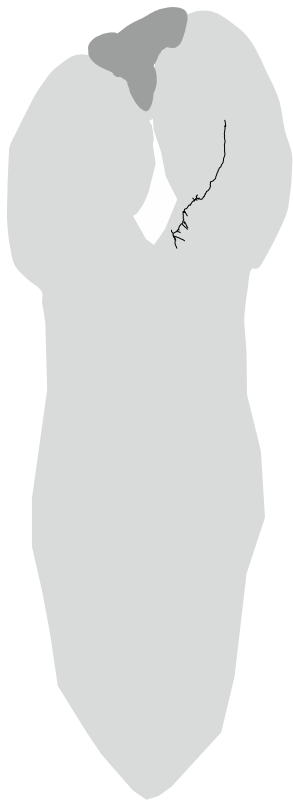

#15574328

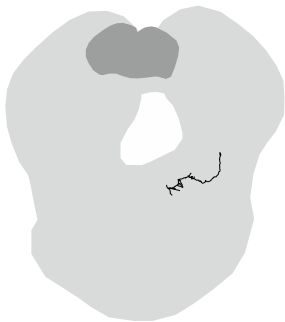

synapses to

synapses from

|                   |   |   |
|-------------------|---|---|
| hugin-PC right 1  | 3 | 1 |
| hugin-PC right 2  | 1 | 0 |
| hugin-PC right 3  | 0 | 0 |
| hugin-PC right 4  | 3 | 1 |
| hugin-PC left 1   | 0 | 0 |
| hugin-PC left 2   | 0 | 0 |
| hugin-PC left 3   | 0 | 0 |
| hugin-PC left 4   | 0 | 0 |
| hugin-RG right 1  | 0 | 0 |
| hugin-RG right 2  | 0 | 0 |
| hugin-RG left 1   | 0 | 0 |
| hugin-RG left 2   | 0 | 0 |
| hugin-VNC right 1 | 0 | 0 |
| hugin-VNC right 2 | 0 | 0 |
| hugin-VNC left 1  | 0 | 0 |
| hugin-VNC left 2  | 0 | 0 |
| hugin-PH right 1  | 0 | 0 |
| hugin-PH right 2  | 0 | 0 |
| hugin-PH left 1   | 0 | 0 |
| hugin-PH left 2   | 0 | 0 |

15.

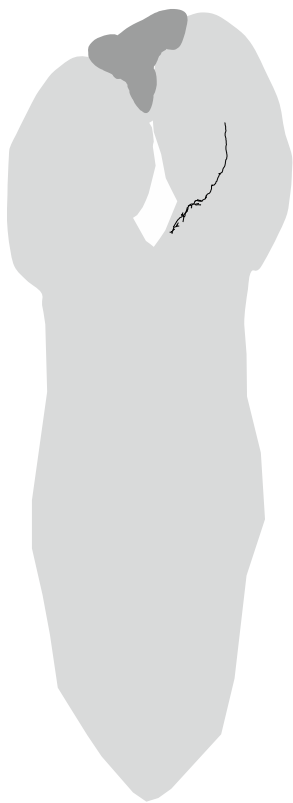

#6883831

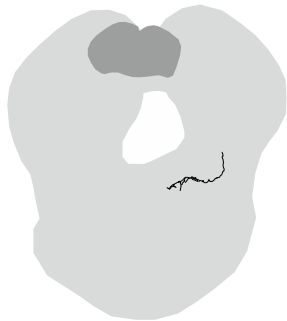

synapses to

synapses from

|                   |   |   |
|-------------------|---|---|
| hugin-PC right 1  | 2 | 2 |
| hugin-PC right 2  | 0 | 0 |
| hugin-PC right 3  | 0 | 0 |
| hugin-PC right 4  | 0 | 0 |
| hugin-PC left 1   | 0 | 0 |
| hugin-PC left 2   | 0 | 0 |
| hugin-PC left 3   | 0 | 0 |
| hugin-PC left 4   | 0 | 0 |
| hugin-RG right 1  | 0 | 0 |
| hugin-RG right 2  | 0 | 0 |
| hugin-RG left 1   | 0 | 0 |
| hugin-RG left 2   | 0 | 0 |
| hugin-VNC right 1 | 0 | 0 |
| hugin-VNC right 2 | 0 | 0 |
| hugin-VNC left 1  | 0 | 0 |
| hugin-VNC left 2  | 0 | 0 |
| hugin-PH right 1  | 0 | 0 |
| hugin-PH right 2  | 0 | 0 |
| hugin-PH left 1   | 0 | 0 |
| hugin-PH left 2   | 0 | 0 |

16.

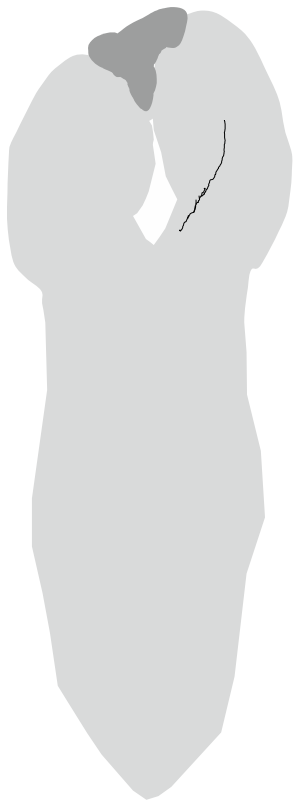

#9716858

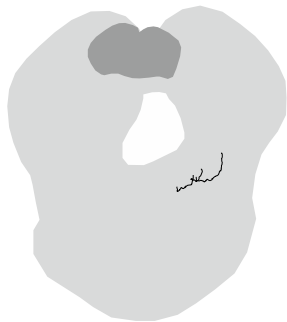

synapses to

synapses from

|                   |   |   |
|-------------------|---|---|
| hugin-PC right 1  | 0 | 0 |
| hugin-PC right 2  | 3 | 0 |
| hugin-PC right 3  | 0 | 0 |
| hugin-PC right 4  | 0 | 0 |
| hugin-PC left 1   | 0 | 0 |
| hugin-PC left 2   | 0 | 0 |
| hugin-PC left 3   | 0 | 0 |
| hugin-PC left 4   | 0 | 0 |
| hugin-RG right 1  | 0 | 0 |
| hugin-RG right 2  | 0 | 0 |
| hugin-RG left 1   | 0 | 0 |
| hugin-RG left 2   | 0 | 0 |
| hugin-VNC right 1 | 0 | 0 |
| hugin-VNC right 2 | 0 | 0 |
| hugin-VNC left 1  | 0 | 0 |
| hugin-VNC left 2  | 0 | 0 |
| hugin-PH right 1  | 0 | 0 |
| hugin-PH right 2  | 0 | 0 |
| hugin-PH left 1   | 0 | 0 |
| hugin-PH left 2   | 0 | 0 |

17.

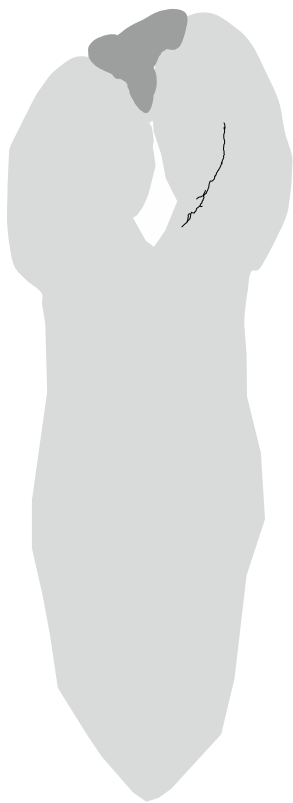

#9748269

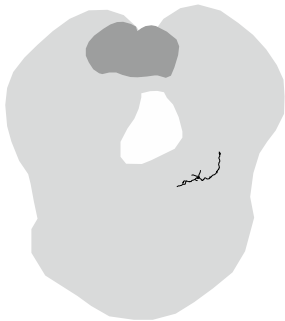

synapses to

synapses from

|                   |   |   |
|-------------------|---|---|
| hugin-PC right 1  | 0 | 0 |
| hugin-PC right 2  | 0 | 0 |
| hugin-PC right 3  | 0 | 0 |
| hugin-PC right 4  | 2 | 0 |
| hugin-PC left 1   | 0 | 0 |
| hugin-PC left 2   | 0 | 0 |
| hugin-PC left 3   | 0 | 0 |
| hugin-PC left 4   | 0 | 0 |
| hugin-RG right 1  | 0 | 0 |
| hugin-RG right 2  | 0 | 0 |
| hugin-RG left 1   | 0 | 0 |
| hugin-RG left 2   | 0 | 0 |
| hugin-VNC right 1 | 0 | 0 |
| hugin-VNC right 2 | 0 | 0 |
| hugin-VNC left 1  | 0 | 0 |
| hugin-VNC left 2  | 0 | 0 |
| hugin-PH right 1  | 0 | 0 |
| hugin-PH right 2  | 0 | 0 |
| hugin-PH left 1   | 0 | 0 |
| hugin-PH left 2   | 0 | 0 |

18.

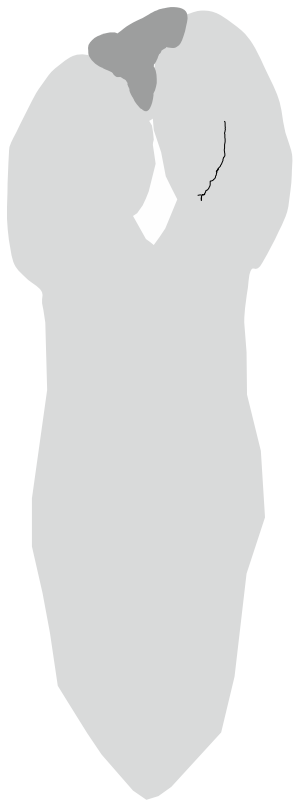

#16442344

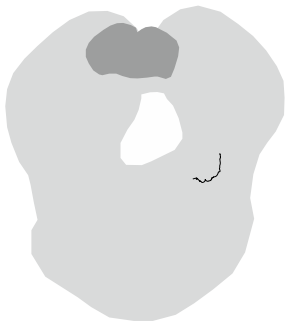

synapses to

synapses from

|                   |   |   |
|-------------------|---|---|
| hugin-PC right 1  | 0 | 0 |
| hugin-PC right 2  | 2 | 0 |
| hugin-PC right 3  | 0 | 0 |
| hugin-PC right 4  | 0 | 0 |
| hugin-PC left 1   | 0 | 0 |
| hugin-PC left 2   | 0 | 0 |
| hugin-PC left 3   | 0 | 0 |
| hugin-PC left 4   | 0 | 0 |
| hugin-RG right 1  | 0 | 0 |
| hugin-RG right 2  | 0 | 0 |
| hugin-RG left 1   | 0 | 0 |
| hugin-RG left 2   | 0 | 0 |
| hugin-VNC right 1 | 0 | 0 |
| hugin-VNC right 2 | 0 | 0 |
| hugin-VNC left 1  | 0 | 0 |
| hugin-VNC left 2  | 0 | 0 |
| hugin-PH right 1  | 0 | 0 |
| hugin-PH right 2  | 0 | 0 |
| hugin-PH left 1   | 0 | 0 |
| hugin-PH left 2   | 0 | 0 |

## AN sensory neurons - C3

1.

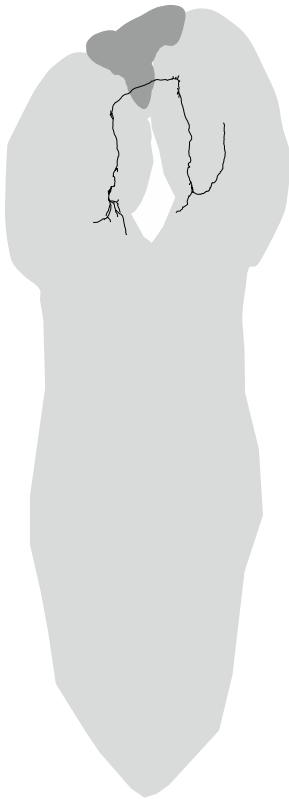

#2340336

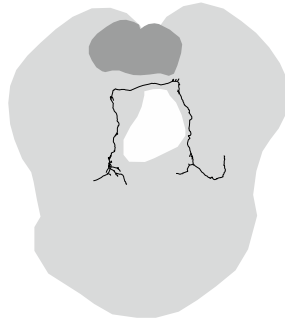

synapses to

synapses from

|                   |   |   |
|-------------------|---|---|
| hugin-PC right 1  | 1 | 1 |
| hugin-PC right 2  | 1 | 0 |
| hugin-PC right 3  | 1 | 0 |
| hugin-PC right 4  | 1 | 0 |
| hugin-PC left 1   | 0 | 0 |
| hugin-PC left 2   | 1 | 0 |
| hugin-PC left 3   | 1 | 0 |
| hugin-PC left 4   | 0 | 0 |
| hugin-RG right 1  | 0 | 0 |
| hugin-RG right 2  | 0 | 0 |
| hugin-RG left 1   | 0 | 0 |
| hugin-RG left 2   | 0 | 0 |
| hugin-VNC right 1 | 0 | 0 |
| hugin-VNC right 2 | 0 | 0 |
| hugin-VNC left 1  | 0 | 0 |
| hugin-VNC left 2  | 0 | 0 |
| hugin-PH right 1  | 0 | 0 |
| hugin-PH right 2  | 0 | 0 |
| hugin-PH left 1   | 0 | 0 |
| hugin-PH left 2   | 0 | 0 |

2.

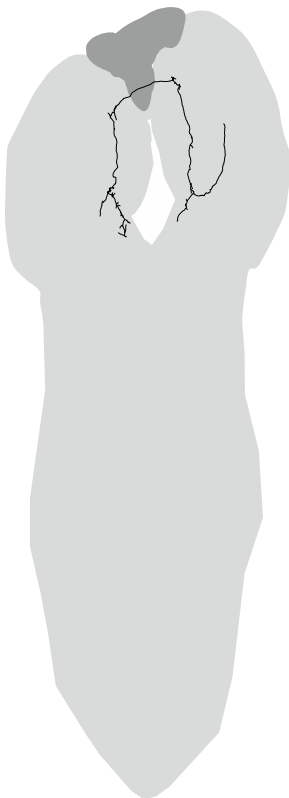

#2456826

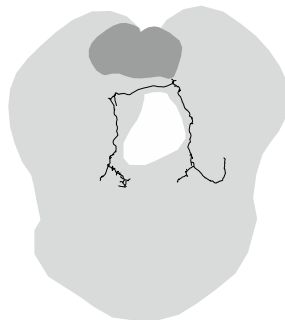

synapses to

synapses from

|                   |   |   |
|-------------------|---|---|
| hugin-PC right 1  | 1 | 0 |
| hugin-PC right 2  | 1 | 0 |
| hugin-PC right 3  | 4 | 0 |
| hugin-PC right 4  | 1 | 0 |
| hugin-PC left 1   | 0 | 0 |
| hugin-PC left 2   | 1 | 0 |
| hugin-PC left 3   | 0 | 1 |
| hugin-PC left 4   | 2 | 0 |
| hugin-RG right 1  | 0 | 0 |
| hugin-RG right 2  | 0 | 0 |
| hugin-RG left 1   | 0 | 0 |
| hugin-RG left 2   | 0 | 0 |
| hugin-VNC right 1 | 0 | 0 |
| hugin-VNC right 2 | 0 | 0 |
| hugin-VNC left 1  | 0 | 0 |
| hugin-VNC left 2  | 0 | 0 |
| hugin-PH right 1  | 0 | 0 |
| hugin-PH right 2  | 0 | 0 |
| hugin-PH left 1   | 0 | 0 |
| hugin-PH left 2   | 0 | 0 |

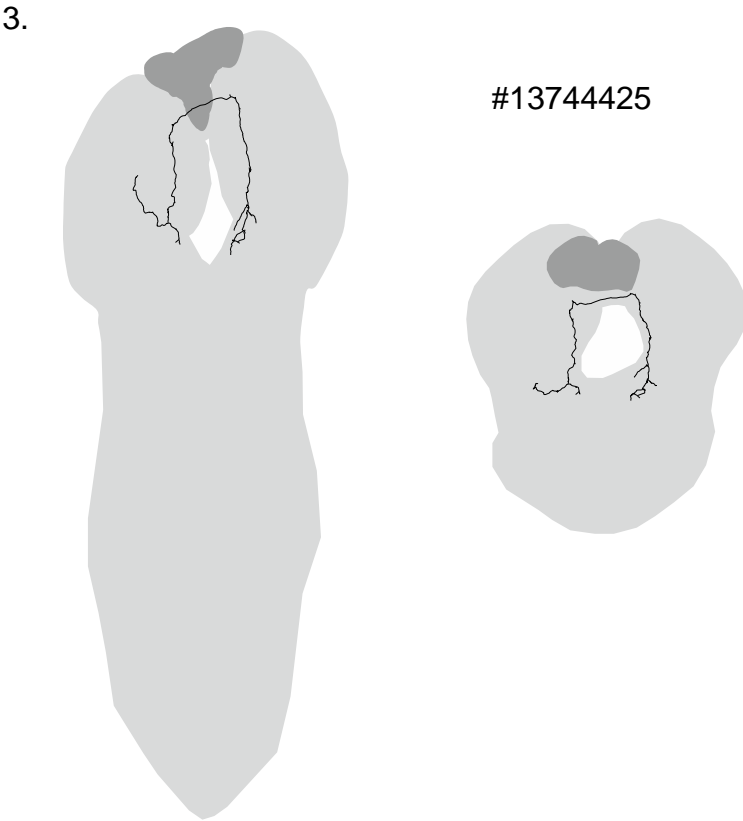

|                   | synapses to | synapses from |
|-------------------|-------------|---------------|
| hugin-PC right 1  | 0           | 2             |
| hugin-PC right 2  | 1           | 1             |
| hugin-PC right 3  | 0           | 0             |
| hugin-PC right 4  | 0           | 0             |
| hugin-PC left 1   | 2           | 0             |
| hugin-PC left 2   | 0           | 0             |
| hugin-PC left 3   | 2           | 0             |
| hugin-PC left 4   | 1           | 0             |
| hugin-RG right 1  | 0           | 0             |
| hugin-RG right 2  | 0           | 0             |
| hugin-RG left 1   | 0           | 0             |
| hugin-RG left 2   | 0           | 0             |
| hugin-VNC right 1 | 0           | 0             |
| hugin-VNC right 2 | 0           | 0             |
| hugin-VNC left 1  | 0           | 0             |
| hugin-VNC left 2  | 0           | 0             |
| hugin-PH right 1  | 0           | 0             |
| hugin-PH right 2  | 0           | 0             |
| hugin-PH left 1   | 0           | 0             |
| hugin-PH left 2   | 0           | 0             |

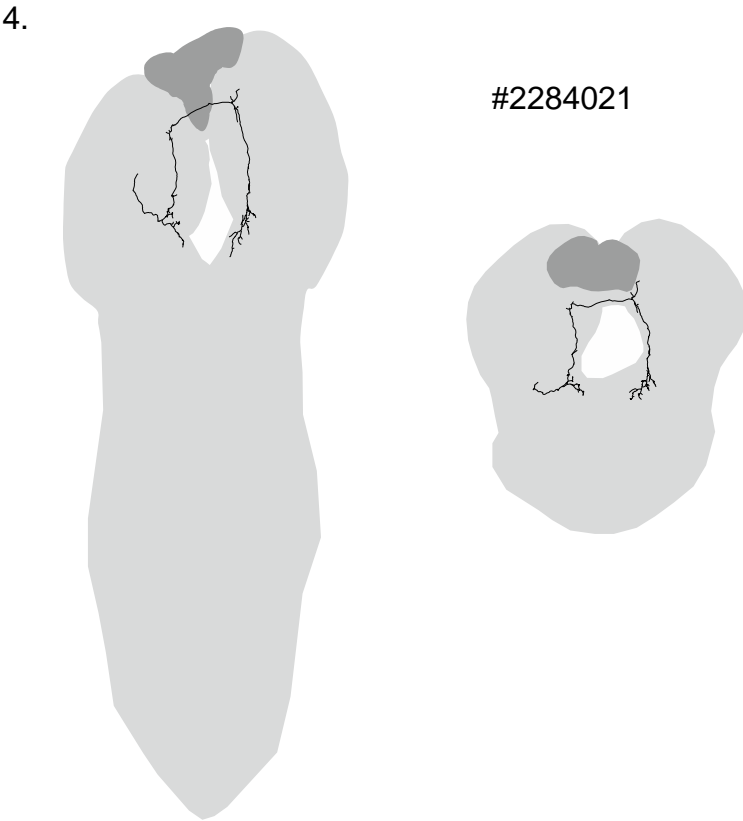

|                   | synapses to | synapses from |
|-------------------|-------------|---------------|
| hugin-PC right 1  | 1           | 1             |
| hugin-PC right 2  | 0           | 1             |
| hugin-PC right 3  | 1           | 0             |
| hugin-PC right 4  | 2           | 0             |
| hugin-PC left 1   | 1           | 0             |
| hugin-PC left 2   | 0           | 0             |
| hugin-PC left 3   | 1           | 1             |
| hugin-PC left 4   | 7           | 0             |
| hugin-RG right 1  | 0           | 0             |
| hugin-RG right 2  | 0           | 0             |
| hugin-RG left 1   | 0           | 0             |
| hugin-RG left 2   | 0           | 0             |
| hugin-VNC right 1 | 0           | 0             |
| hugin-VNC right 2 | 0           | 0             |
| hugin-VNC left 1  | 0           | 0             |
| hugin-VNC left 2  | 0           | 0             |
| hugin-PH right 1  | 0           | 0             |
| hugin-PH right 2  | 0           | 0             |
| hugin-PH left 1   | 0           | 0             |
| hugin-PH left 2   | 0           | 0             |

## AN sensory neurons - C4

1.

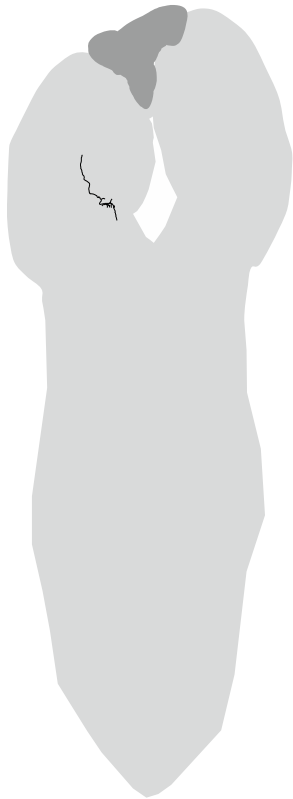

#15998753

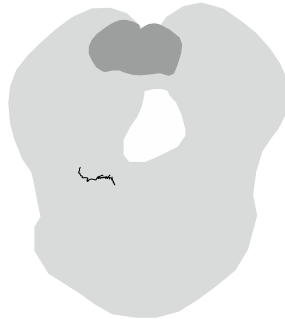

synapses to

synapses from

|                   |   |   |
|-------------------|---|---|
| hugin-PC right 1  | 0 | 0 |
| hugin-PC right 2  | 0 | 0 |
| hugin-PC right 3  | 0 | 0 |
| hugin-PC right 4  | 0 | 0 |
| hugin-PC left 1   | 3 | 0 |
| hugin-PC left 2   | 0 | 0 |
| hugin-PC left 3   | 0 | 0 |
| hugin-PC left 4   | 2 | 0 |
| hugin-RG right 1  | 0 | 0 |
| hugin-RG right 2  | 0 | 0 |
| hugin-RG left 1   | 0 | 0 |
| hugin-RG left 2   | 0 | 0 |
| hugin-VNC right 1 | 0 | 0 |
| hugin-VNC right 2 | 0 | 0 |
| hugin-VNC left 1  | 0 | 0 |
| hugin-VNC left 2  | 0 | 0 |
| hugin-PH right 1  | 0 | 0 |
| hugin-PH right 2  | 0 | 0 |
| hugin-PH left 1   | 0 | 0 |
| hugin-PH left 2   | 0 | 0 |

2.

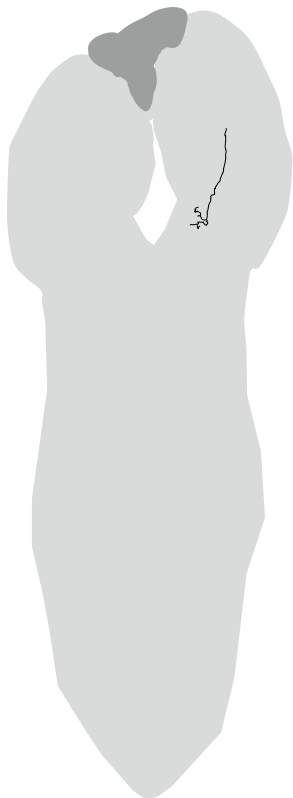

#15532105

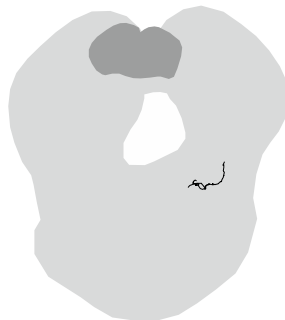

synapses to

synapses from

|                   |   |   |
|-------------------|---|---|
| hugin-PC right 1  | 0 | 0 |
| hugin-PC right 2  | 0 | 0 |
| hugin-PC right 3  | 0 | 0 |
| hugin-PC right 4  | 3 | 0 |
| hugin-PC left 1   | 0 | 0 |
| hugin-PC left 2   | 0 | 0 |
| hugin-PC left 3   | 0 | 0 |
| hugin-PC left 4   | 0 | 0 |
| hugin-RG right 1  | 0 | 0 |
| hugin-RG right 2  | 0 | 0 |
| hugin-RG left 1   | 0 | 0 |
| hugin-RG left 2   | 0 | 0 |
| hugin-VNC right 1 | 0 | 0 |
| hugin-VNC right 2 | 0 | 0 |
| hugin-VNC left 1  | 0 | 0 |
| hugin-VNC left 2  | 0 | 0 |
| hugin-PH right 1  | 0 | 0 |
| hugin-PH right 2  | 0 | 0 |
| hugin-PH left 1   | 0 | 0 |
| hugin-PH left 2   | 0 | 0 |

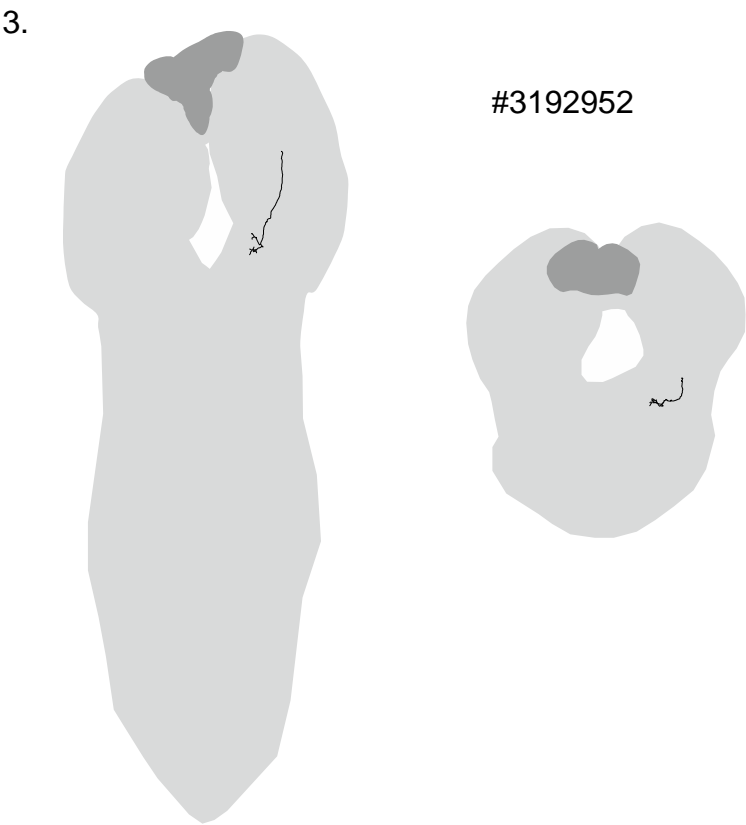

|                   | synapses to | synapses from |
|-------------------|-------------|---------------|
| hugin-PC right 1  | 0           | 0             |
| hugin-PC right 2  | 0           | 0             |
| hugin-PC right 3  | 0           | 0             |
| hugin-PC right 4  | 2           | 0             |
| hugin-PC left 1   | 0           | 0             |
| hugin-PC left 2   | 0           | 0             |
| hugin-PC left 3   | 0           | 0             |
| hugin-PC left 4   | 0           | 0             |
| hugin-RG right 1  | 0           | 0             |
| hugin-RG right 2  | 0           | 0             |
| hugin-RG left 1   | 0           | 0             |
| hugin-RG left 2   | 0           | 0             |
| hugin-VNC right 1 | 0           | 0             |
| hugin-VNC right 2 | 0           | 0             |
| hugin-VNC left 1  | 0           | 0             |
| hugin-VNC left 2  | 0           | 0             |
| hugin-PH right 1  | 0           | 0             |
| hugin-PH right 2  | 0           | 0             |
| hugin-PH left 1   | 0           | 0             |
| hugin-PH left 2   | 0           | 0             |



## AN sensory neurons - C5

1.

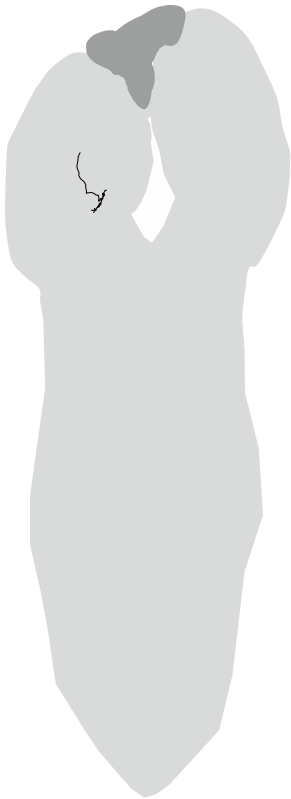

#1706716

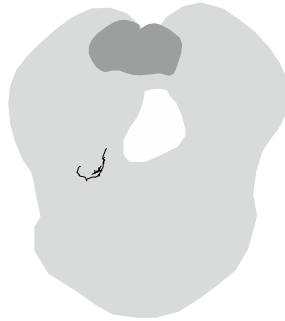

synapses to

synapses from

|                   |   |   |
|-------------------|---|---|
| hugin-PC right 1  | 0 | 0 |
| hugin-PC right 2  | 0 | 0 |
| hugin-PC right 3  | 0 | 0 |
| hugin-PC right 4  | 0 | 0 |
| hugin-PC left 1   | 2 | 0 |
| hugin-PC left 2   | 0 | 0 |
| hugin-PC left 3   | 0 | 0 |
| hugin-PC left 4   | 0 | 0 |
| hugin-RG right 1  | 0 | 0 |
| hugin-RG right 2  | 0 | 0 |
| hugin-RG left 1   | 0 | 0 |
| hugin-RG left 2   | 0 | 0 |
| hugin-VNC right 1 | 0 | 0 |
| hugin-VNC right 2 | 0 | 0 |
| hugin-VNC left 1  | 0 | 0 |
| hugin-VNC left 2  | 0 | 0 |
| hugin-PH right 1  | 0 | 0 |
| hugin-PH right 2  | 0 | 0 |
| hugin-PH left 1   | 0 | 0 |
| hugin-PH left 2   | 0 | 0 |

2.

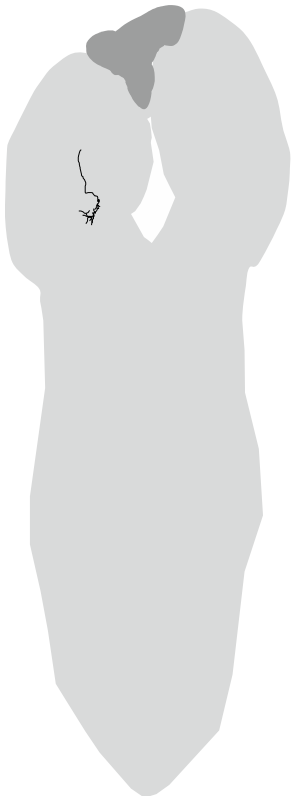

#15995929

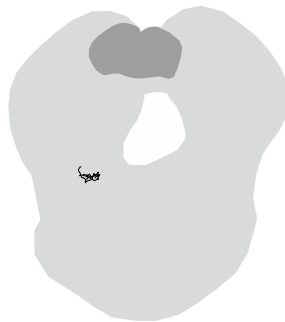

synapses to

synapses from

|                   |   |   |
|-------------------|---|---|
| hugin-PC right 1  | 0 | 0 |
| hugin-PC right 2  | 0 | 0 |
| hugin-PC right 3  | 0 | 0 |
| hugin-PC right 4  | 0 | 0 |
| hugin-PC left 1   | 3 | 0 |
| hugin-PC left 2   | 0 | 0 |
| hugin-PC left 3   | 0 | 0 |
| hugin-PC left 4   | 0 | 0 |
| hugin-RG right 1  | 0 | 0 |
| hugin-RG right 2  | 0 | 0 |
| hugin-RG left 1   | 0 | 0 |
| hugin-RG left 2   | 0 | 0 |
| hugin-VNC right 1 | 0 | 0 |
| hugin-VNC right 2 | 0 | 0 |
| hugin-VNC left 1  | 0 | 0 |
| hugin-VNC left 2  | 0 | 0 |
| hugin-PH right 1  | 0 | 0 |
| hugin-PH right 2  | 0 | 0 |
| hugin-PH left 1   | 0 | 0 |
| hugin-PH left 2   | 0 | 0 |

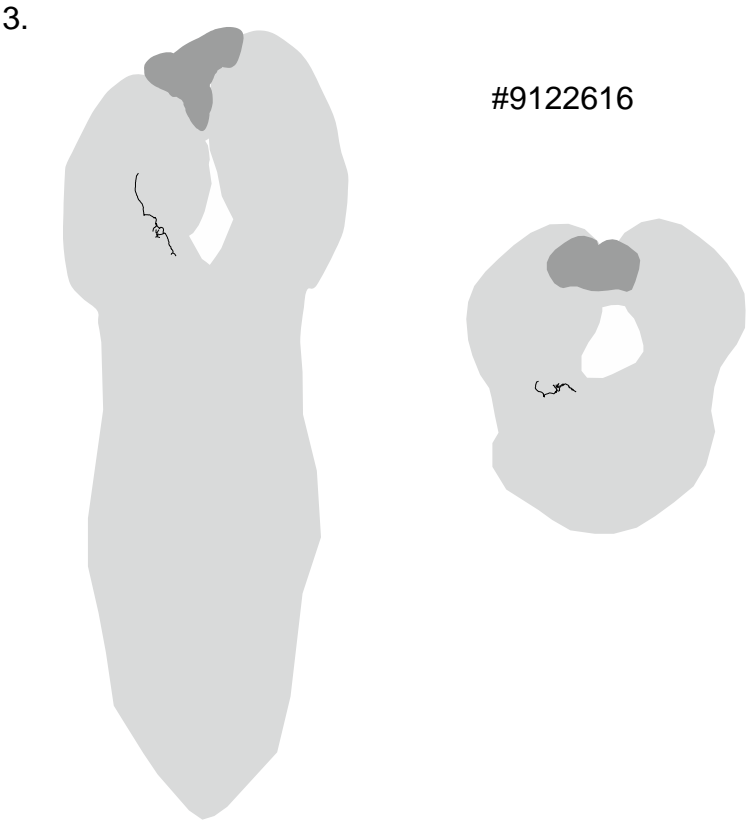

|                   | synapses to | synapses from |
|-------------------|-------------|---------------|
| hugin-PC right 1  | 0           | 0             |
| hugin-PC right 2  | 0           | 0             |
| hugin-PC right 3  | 0           | 0             |
| hugin-PC right 4  | 0           | 0             |
| hugin-PC left 1   | 3           | 0             |
| hugin-PC left 2   | 0           | 0             |
| hugin-PC left 3   | 0           | 0             |
| hugin-PC left 4   | 0           | 0             |
| hugin-RG right 1  | 0           | 0             |
| hugin-RG right 2  | 0           | 0             |
| hugin-RG left 1   | 0           | 0             |
| hugin-RG left 2   | 0           | 0             |
| hugin-VNC right 1 | 0           | 0             |
| hugin-VNC right 2 | 0           | 0             |
| hugin-VNC left 1  | 0           | 0             |
| hugin-VNC left 2  | 0           | 0             |
| hugin-PH right 1  | 0           | 0             |
| hugin-PH right 2  | 0           | 0             |
| hugin-PH left 1   | 0           | 0             |
| hugin-PH left 2   | 0           | 0             |

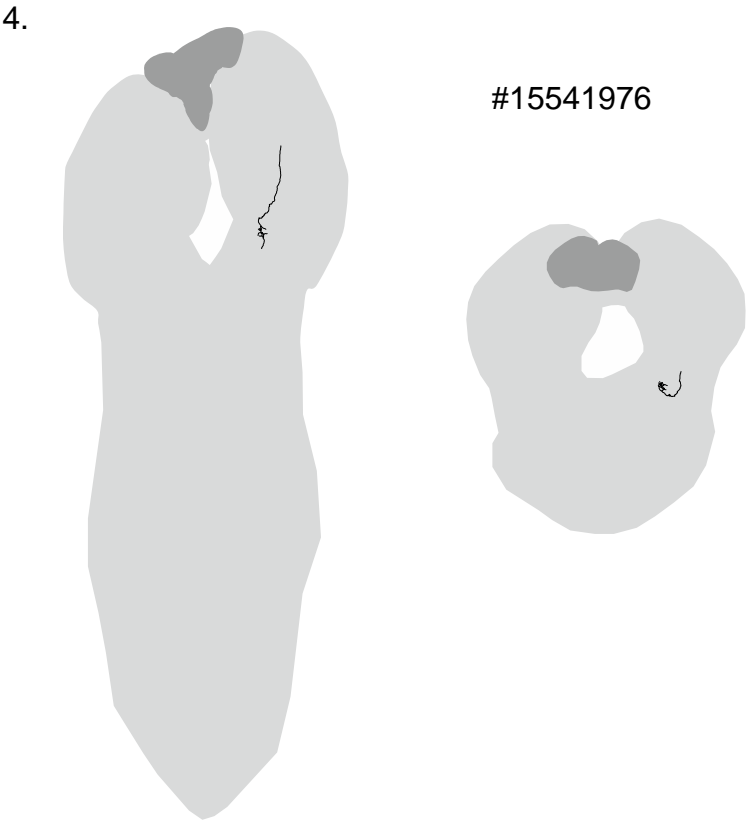

|                   | synapses to | synapses from |
|-------------------|-------------|---------------|
| hugin-PC right 1  | 0           | 0             |
| hugin-PC right 2  | 0           | 0             |
| hugin-PC right 3  | 2           | 0             |
| hugin-PC right 4  | 0           | 0             |
| hugin-PC left 1   | 0           | 0             |
| hugin-PC left 2   | 0           | 0             |
| hugin-PC left 3   | 0           | 0             |
| hugin-PC left 4   | 0           | 0             |
| hugin-RG right 1  | 0           | 0             |
| hugin-RG right 2  | 0           | 0             |
| hugin-RG left 1   | 0           | 0             |
| hugin-RG left 2   | 0           | 0             |
| hugin-VNC right 1 | 0           | 0             |
| hugin-VNC right 2 | 0           | 0             |
| hugin-VNC left 1  | 0           | 0             |
| hugin-VNC left 2  | 0           | 0             |
| hugin-PH right 1  | 0           | 0             |
| hugin-PH right 2  | 0           | 0             |
| hugin-PH left 1   | 0           | 0             |
| hugin-PH left 2   | 0           | 0             |

5.

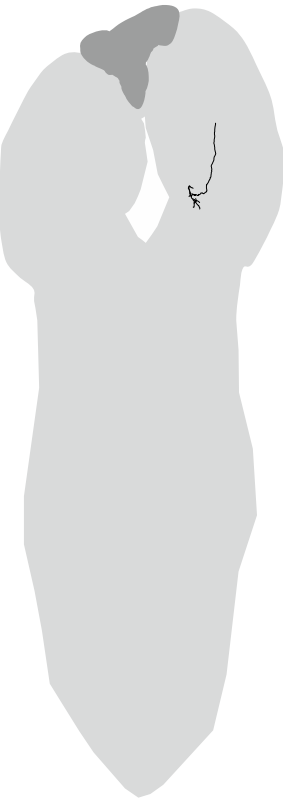

#15506094

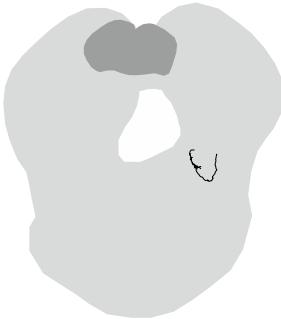

|                   | synapses to | synapses from |
|-------------------|-------------|---------------|
| hugin-PC right 1  | 0           | 0             |
| hugin-PC right 2  | 0           | 0             |
| hugin-PC right 3  | 6           | 0             |
| hugin-PC right 4  | 0           | 0             |
| hugin-PC left 1   | 0           | 0             |
| hugin-PC left 2   | 0           | 0             |
| hugin-PC left 3   | 0           | 0             |
| hugin-PC left 4   | 0           | 0             |
| hugin-RG right 1  | 0           | 0             |
| hugin-RG right 2  | 0           | 0             |
| hugin-RG left 1   | 0           | 0             |
| hugin-RG left 2   | 0           | 0             |
| hugin-VNC right 1 | 0           | 0             |
| hugin-VNC right 2 | 0           | 0             |
| hugin-VNC left 1  | 0           | 0             |
| hugin-VNC left 2  | 0           | 0             |
| hugin-PH right 1  | 0           | 0             |
| hugin-PH right 2  | 0           | 0             |
| hugin-PH left 1   | 0           | 0             |
| hugin-PH left 2   | 0           | 0             |

## AN sensory neurons - C6

1.

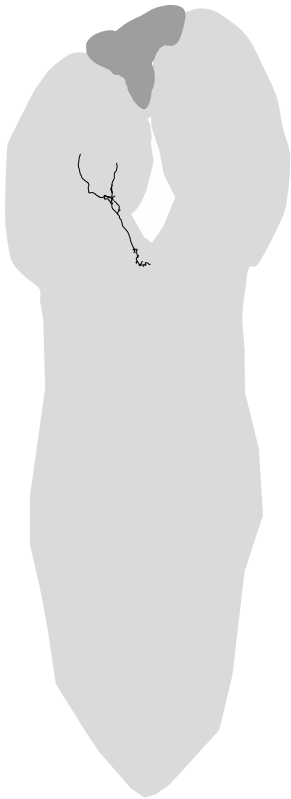

#15997666

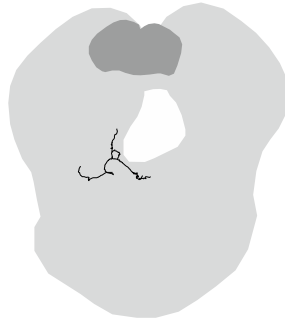

synapses to

synapses from

|                   |   |   |
|-------------------|---|---|
| hugin-PC right 1  | 0 | 0 |
| hugin-PC right 2  | 0 | 0 |
| hugin-PC right 3  | 0 | 0 |
| hugin-PC right 4  | 0 | 0 |
| hugin-PC left 1   | 0 | 0 |
| hugin-PC left 2   | 0 | 0 |
| hugin-PC left 3   | 1 | 0 |
| hugin-PC left 4   | 0 | 0 |
| hugin-RG right 1  | 1 | 0 |
| hugin-RG right 2  | 0 | 0 |
| hugin-RG left 1   | 2 | 0 |
| hugin-RG left 2   | 0 | 0 |
| hugin-VNC right 1 | 0 | 0 |
| hugin-VNC right 2 | 0 | 0 |
| hugin-VNC left 1  | 0 | 0 |
| hugin-VNC left 2  | 0 | 0 |
| hugin-PH right 1  | 0 | 0 |
| hugin-PH right 2  | 0 | 0 |
| hugin-PH left 1   | 0 | 0 |
| hugin-PH left 2   | 0 | 0 |

2.

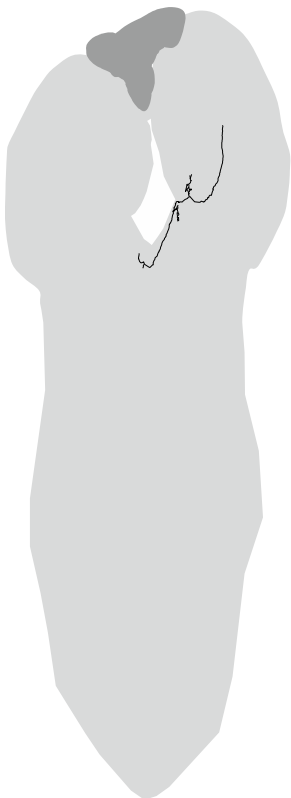

#15541944

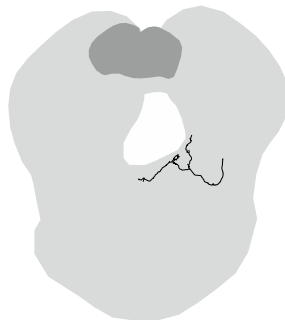

synapses to

synapses from

|                   |   |   |
|-------------------|---|---|
| hugin-PC right 1  | 0 | 0 |
| hugin-PC right 2  | 0 | 0 |
| hugin-PC right 3  | 0 | 0 |
| hugin-PC right 4  | 0 | 0 |
| hugin-PC left 1   | 0 | 0 |
| hugin-PC left 2   | 0 | 0 |
| hugin-PC left 3   | 0 | 0 |
| hugin-PC left 4   | 0 | 0 |
| hugin-RG right 1  | 0 | 0 |
| hugin-RG right 2  | 0 | 0 |
| hugin-RG left 1   | 0 | 0 |
| hugin-RG left 2   | 1 | 0 |
| hugin-VNC right 1 | 0 | 0 |
| hugin-VNC right 2 | 1 | 0 |
| hugin-VNC left 1  | 0 | 0 |
| hugin-VNC left 2  | 0 | 0 |
| hugin-PH right 1  | 0 | 0 |
| hugin-PH right 2  | 0 | 0 |
| hugin-PH left 1   | 0 | 0 |
| hugin-PH left 2   | 0 | 0 |

I Abdominal sensory neurons

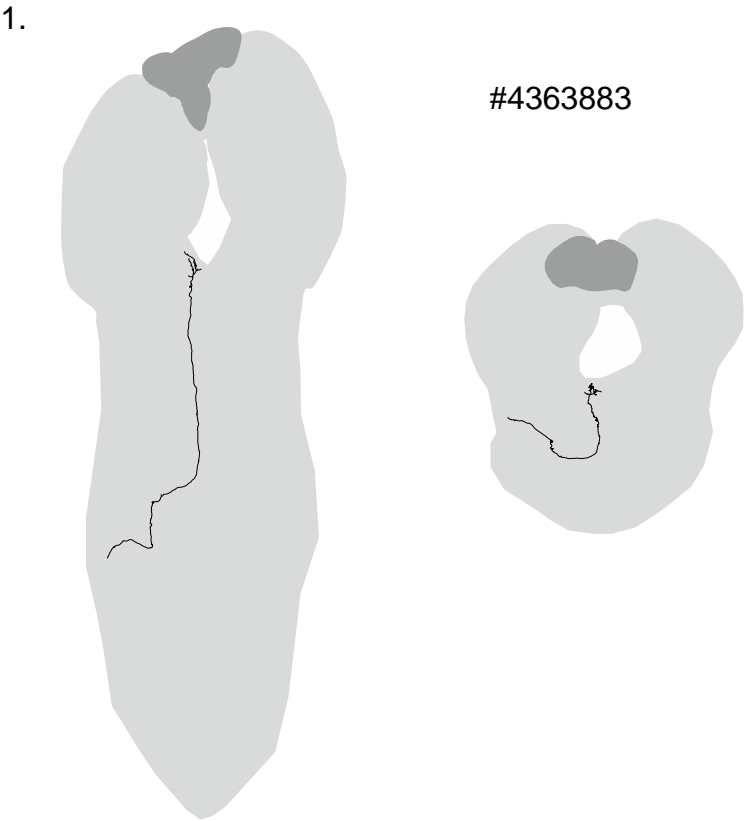

|                   | synapses to | synapses from |
|-------------------|-------------|---------------|
| hugin-PC right 1  | 0           | 0             |
| hugin-PC right 2  | 0           | 0             |
| hugin-PC right 3  | 0           | 0             |
| hugin-PC right 4  | 0           | 0             |
| hugin-PC left 1   | 0           | 0             |
| hugin-PC left 2   | 0           | 0             |
| hugin-PC left 3   | 0           | 0             |
| hugin-PC left 4   | 0           | 0             |
| hugin-RG right 1  | 0           | 0             |
| hugin-RG right 2  | 0           | 0             |
| hugin-RG left 1   | 0           | 0             |
| hugin-RG left 2   | 0           | 0             |
| hugin-VNC right 1 | 3           | 0             |
| hugin-VNC right 2 | 2           | 0             |
| hugin-VNC left 1  | 4           | 0             |
| hugin-VNC left 2  | 0           | 0             |
| hugin-PH right 1  | 0           | 0             |
| hugin-PH right 2  | 0           | 0             |
| hugin-PH left 1   | 0           | 0             |
| hugin-PH left 2   | 0           | 0             |

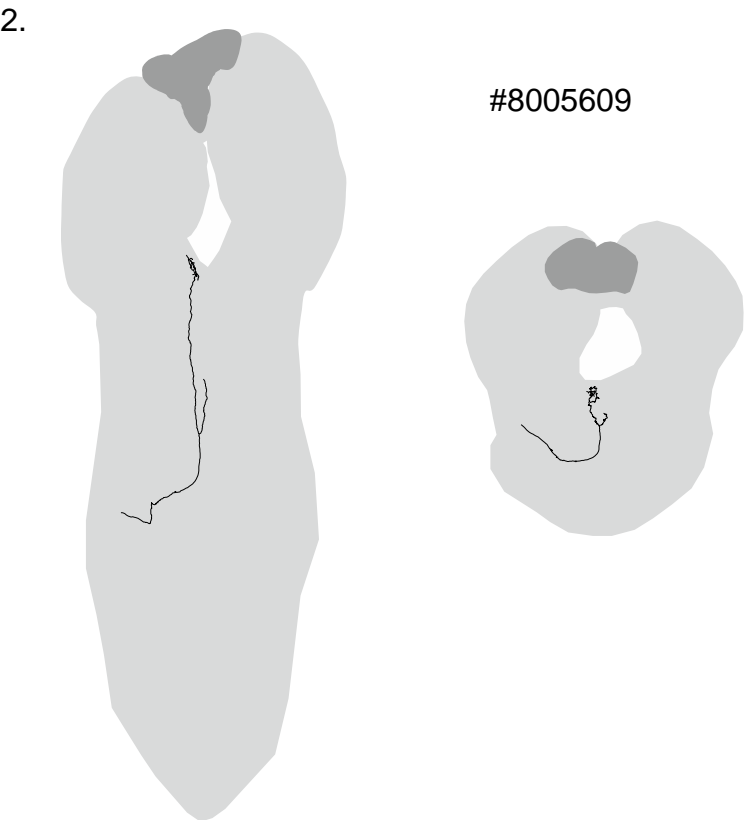

|                   | synapses to | synapses from |
|-------------------|-------------|---------------|
| hugin-PC right 1  | 0           | 0             |
| hugin-PC right 2  | 0           | 0             |
| hugin-PC right 3  | 0           | 0             |
| hugin-PC right 4  | 0           | 0             |
| hugin-PC left 1   | 0           | 0             |
| hugin-PC left 2   | 0           | 0             |
| hugin-PC left 3   | 0           | 0             |
| hugin-PC left 4   | 0           | 0             |
| hugin-RG right 1  | 0           | 0             |
| hugin-RG right 2  | 0           | 0             |
| hugin-RG left 1   | 0           | 0             |
| hugin-RG left 2   | 0           | 0             |
| hugin-VNC right 1 | 2           | 0             |
| hugin-VNC right 2 | 4           | 0             |
| hugin-VNC left 1  | 3           | 0             |
| hugin-VNC left 2  | 0           | 0             |
| hugin-PH right 1  | 0           | 0             |
| hugin-PH right 2  | 0           | 0             |
| hugin-PH left 1   | 0           | 0             |
| hugin-PH left 2   | 0           | 0             |

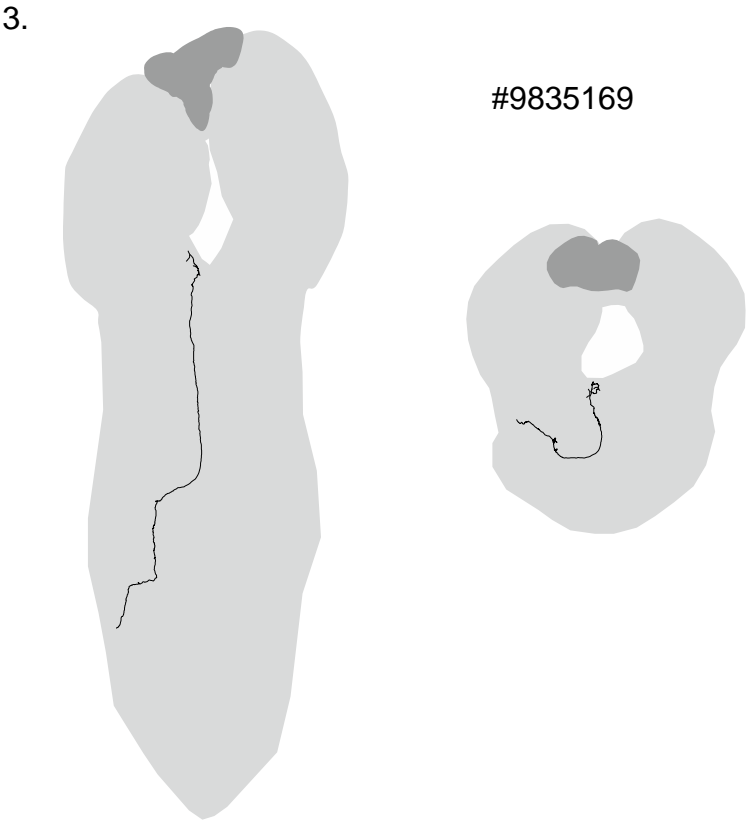

|                   | synapses to | synapses from |
|-------------------|-------------|---------------|
| hugin-PC right 1  | 0           | 0             |
| hugin-PC right 2  | 0           | 0             |
| hugin-PC right 3  | 0           | 0             |
| hugin-PC right 4  | 0           | 0             |
| hugin-PC left 1   | 0           | 0             |
| hugin-PC left 2   | 0           | 0             |
| hugin-PC left 3   | 0           | 0             |
| hugin-PC left 4   | 1           | 0             |
| hugin-RG right 1  | 0           | 0             |
| hugin-RG right 2  | 0           | 0             |
| hugin-RG left 1   | 0           | 0             |
| hugin-RG left 2   | 0           | 0             |
| hugin-VNC right 1 | 1           | 0             |
| hugin-VNC right 2 | 2           | 0             |
| hugin-VNC left 1  | 0           | 0             |
| hugin-VNC left 2  | 0           | 0             |
| hugin-PH right 1  | 0           | 0             |
| hugin-PH right 2  | 0           | 0             |
| hugin-PH left 1   | 0           | 0             |
| hugin-PH left 2   | 0           | 0             |

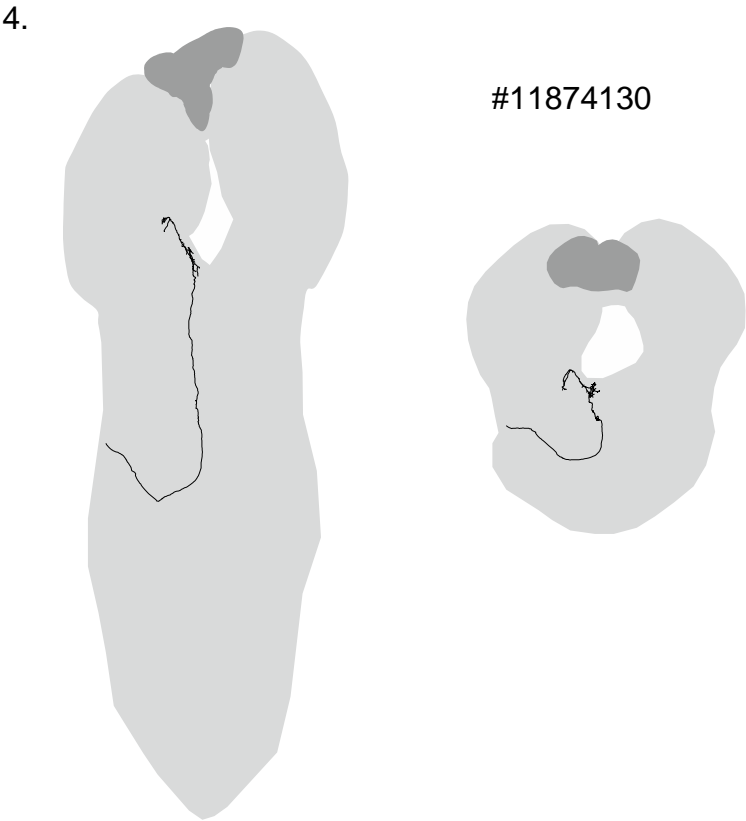

|                   | synapses to | synapses from |
|-------------------|-------------|---------------|
| hugin-PC right 1  | 0           | 0             |
| hugin-PC right 2  | 0           | 0             |
| hugin-PC right 3  | 0           | 0             |
| hugin-PC right 4  | 0           | 0             |
| hugin-PC left 1   | 0           | 0             |
| hugin-PC left 2   | 0           | 0             |
| hugin-PC left 3   | 1           | 0             |
| hugin-PC left 4   | 0           | 0             |
| hugin-RG right 1  | 0           | 0             |
| hugin-RG right 2  | 0           | 0             |
| hugin-RG left 1   | 0           | 0             |
| hugin-RG left 2   | 0           | 0             |
| hugin-VNC right 1 | 1           | 0             |
| hugin-VNC right 2 | 3           | 0             |
| hugin-VNC left 1  | 2           | 0             |
| hugin-VNC left 2  | 0           | 0             |
| hugin-PH right 1  | 0           | 0             |
| hugin-PH right 2  | 0           | 0             |
| hugin-PH left 1   | 0           | 0             |
| hugin-PH left 2   | 0           | 0             |

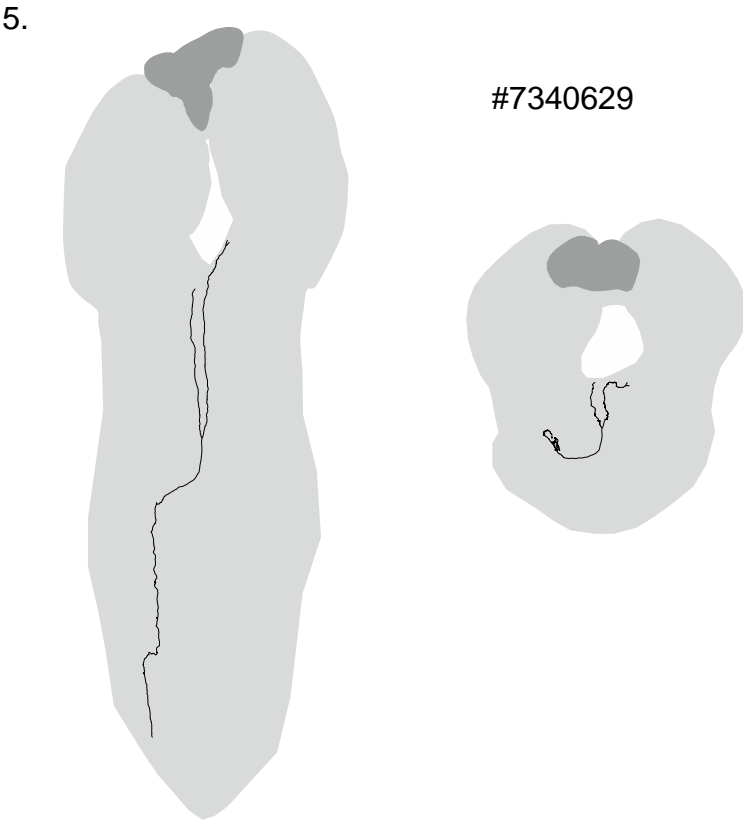

|                   | synapses to | synapses from |
|-------------------|-------------|---------------|
| hugin-PC right 1  | 0           | 0             |
| hugin-PC right 2  | 0           | 0             |
| hugin-PC right 3  | 0           | 0             |
| hugin-PC right 4  | 0           | 0             |
| hugin-PC left 1   | 0           | 0             |
| hugin-PC left 2   | 0           | 0             |
| hugin-PC left 3   | 0           | 0             |
| hugin-PC left 4   | 0           | 0             |
| hugin-RG right 1  | 0           | 0             |
| hugin-RG right 2  | 0           | 0             |
| hugin-RG left 1   | 0           | 0             |
| hugin-RG left 2   | 0           | 0             |
| hugin-VNC right 1 | 1           | 0             |
| hugin-VNC right 2 | 0           | 0             |
| hugin-VNC left 1  | 1           | 0             |
| hugin-VNC left 2  | 2           | 0             |
| hugin-PH right 1  | 0           | 0             |
| hugin-PH right 2  | 0           | 0             |
| hugin-PH left 1   | 0           | 0             |
| hugin-PH left 2   | 0           | 0             |

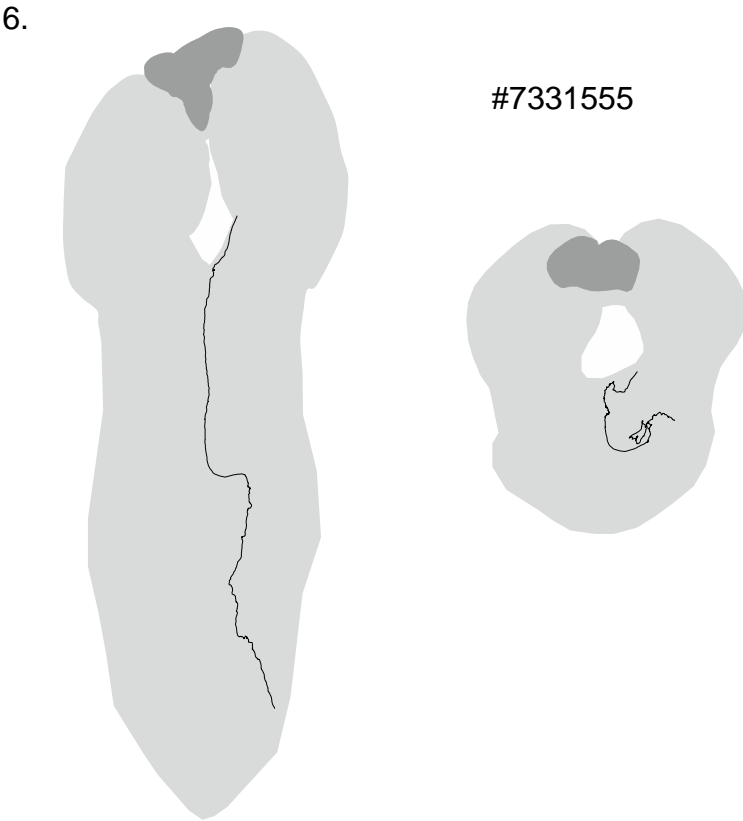

|                   | synapses to | synapses from |
|-------------------|-------------|---------------|
| hugin-PC right 1  | 0           | 0             |
| hugin-PC right 2  | 0           | 0             |
| hugin-PC right 3  | 0           | 0             |
| hugin-PC right 4  | 0           | 0             |
| hugin-PC left 1   | 0           | 0             |
| hugin-PC left 2   | 0           | 0             |
| hugin-PC left 3   | 0           | 0             |
| hugin-PC left 4   | 0           | 0             |
| hugin-RG right 1  | 0           | 0             |
| hugin-RG right 2  | 0           | 0             |
| hugin-RG left 1   | 0           | 0             |
| hugin-RG left 2   | 0           | 0             |
| hugin-VNC right 1 | 4           | 0             |
| hugin-VNC right 2 | 0           | 0             |
| hugin-VNC left 1  | 0           | 0             |
| hugin-VNC left 2  | 4           | 0             |
| hugin-PH right 1  | 0           | 0             |
| hugin-PH right 2  | 0           | 0             |
| hugin-PH left 1   | 0           | 0             |
| hugin-PH left 2   | 0           | 0             |

7.

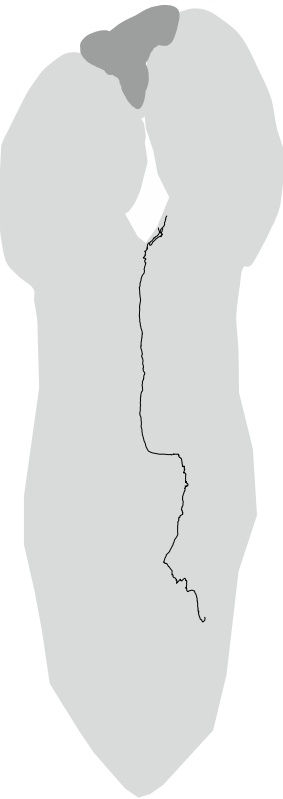

#11291344

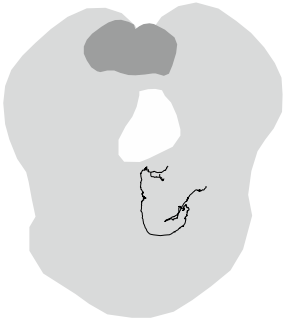

synapses to      synapses from

|                   |   |   |
|-------------------|---|---|
| hugin-PC right 1  | 0 | 0 |
| hugin-PC right 2  | 0 | 0 |
| hugin-PC right 3  | 0 | 0 |
| hugin-PC right 4  | 0 | 0 |
| hugin-PC left 1   | 0 | 0 |
| hugin-PC left 2   | 0 | 0 |
| hugin-PC left 3   | 0 | 0 |
| hugin-PC left 4   | 0 | 0 |
| hugin-RG right 1  | 0 | 0 |
| hugin-RG right 2  | 0 | 0 |
| hugin-RG left 1   | 0 | 0 |
| hugin-RG left 2   | 0 | 0 |
| hugin-VNC right 1 | 3 | 0 |
| hugin-VNC right 2 | 0 | 0 |
| hugin-VNC left 1  | 3 | 0 |
| hugin-VNC left 2  | 4 | 0 |
| hugin-PH right 1  | 0 | 0 |
| hugin-PH right 2  | 0 | 0 |
| hugin-PH left 1   | 0 | 0 |
| hugin-PH left 2   | 0 | 0 |

8.

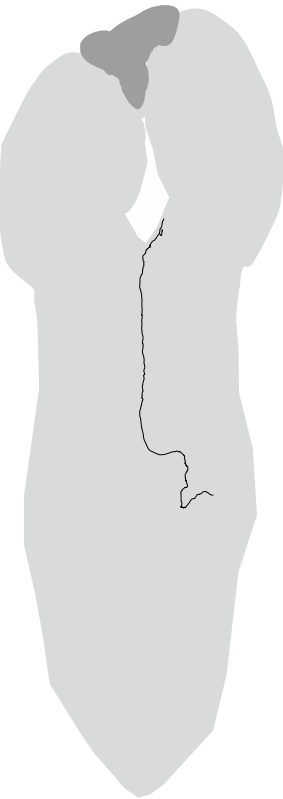

#5382876

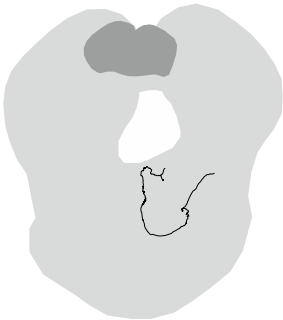

synapses to      synapses from

|                   |   |   |
|-------------------|---|---|
| hugin-PC right 1  | 0 | 0 |
| hugin-PC right 2  | 0 | 0 |
| hugin-PC right 3  | 0 | 0 |
| hugin-PC right 4  | 0 | 0 |
| hugin-PC left 1   | 0 | 0 |
| hugin-PC left 2   | 0 | 0 |
| hugin-PC left 3   | 0 | 0 |
| hugin-PC left 4   | 0 | 0 |
| hugin-RG right 1  | 0 | 0 |
| hugin-RG right 2  | 0 | 0 |
| hugin-RG left 1   | 0 | 0 |
| hugin-RG left 2   | 0 | 0 |
| hugin-VNC right 1 | 2 | 0 |
| hugin-VNC right 2 | 0 | 0 |
| hugin-VNC left 1  | 2 | 0 |
| hugin-VNC left 2  | 3 | 0 |
| hugin-PH right 1  | 0 | 0 |
| hugin-PH right 2  | 0 | 0 |
| hugin-PH left 1   | 0 | 0 |
| hugin-PH left 2   | 0 | 0 |



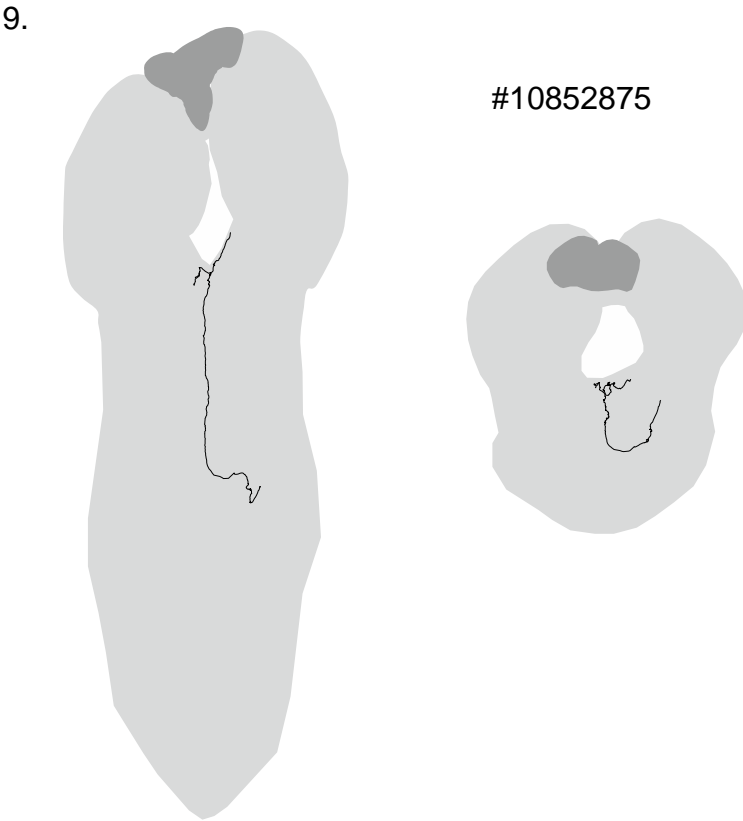

|                   | synapses to | synapses from |
|-------------------|-------------|---------------|
| hugin-PC right 1  | 0           | 0             |
| hugin-PC right 2  | 0           | 0             |
| hugin-PC right 3  | 0           | 0             |
| hugin-PC right 4  | 0           | 0             |
| hugin-PC left 1   | 0           | 0             |
| hugin-PC left 2   | 0           | 0             |
| hugin-PC left 3   | 0           | 0             |
| hugin-PC left 4   | 0           | 0             |
| hugin-RG right 1  | 0           | 0             |
| hugin-RG right 2  | 1           | 0             |
| hugin-RG left 1   | 0           | 0             |
| hugin-RG left 2   | 0           | 0             |
| hugin-VNC right 1 | 6           | 0             |
| hugin-VNC right 2 | 0           | 0             |
| hugin-VNC left 1  | 0           | 0             |
| hugin-VNC left 2  | 0           | 0             |
| hugin-PH right 1  | 0           | 0             |
| hugin-PH right 2  | 0           | 0             |
| hugin-PH left 1   | 0           | 0             |
| hugin-PH left 2   | 0           | 0             |

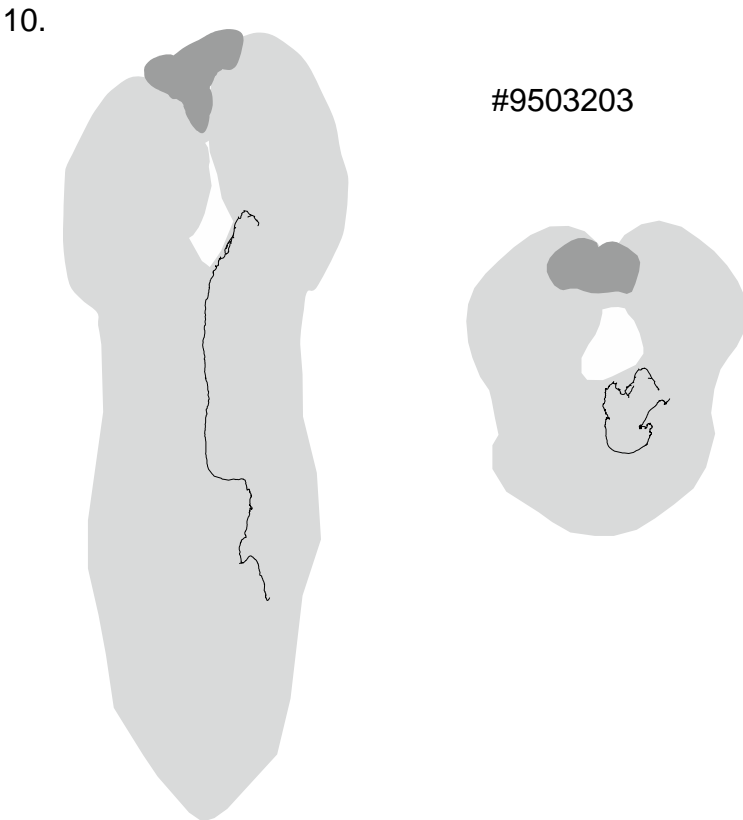

|                   | synapses to | synapses from |
|-------------------|-------------|---------------|
| hugin-PC right 1  | 0           | 0             |
| hugin-PC right 2  | 1           | 0             |
| hugin-PC right 3  | 0           | 0             |
| hugin-PC right 4  | 0           | 0             |
| hugin-PC left 1   | 0           | 0             |
| hugin-PC left 2   | 0           | 0             |
| hugin-PC left 3   | 0           | 0             |
| hugin-PC left 4   | 0           | 0             |
| hugin-RG right 1  | 0           | 0             |
| hugin-RG right 2  | 0           | 0             |
| hugin-RG left 1   | 0           | 0             |
| hugin-RG left 2   | 0           | 0             |
| hugin-VNC right 1 | 1           | 0             |
| hugin-VNC right 2 | 0           | 0             |
| hugin-VNC left 1  | 2           | 0             |
| hugin-VNC left 2  | 0           | 0             |
| hugin-PH right 1  | 0           | 0             |
| hugin-PH right 2  | 0           | 0             |
| hugin-PH left 1   | 0           | 0             |
| hugin-PH left 2   | 0           | 0             |

11.

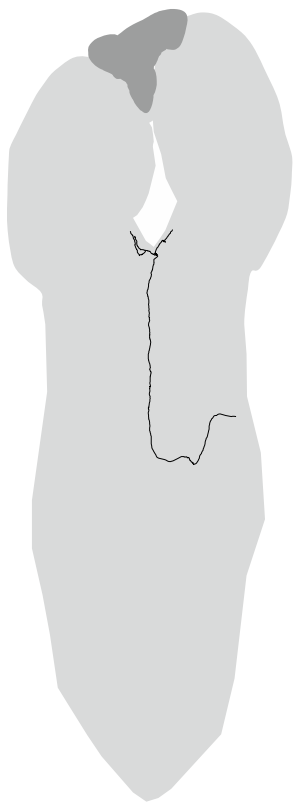

#10868477

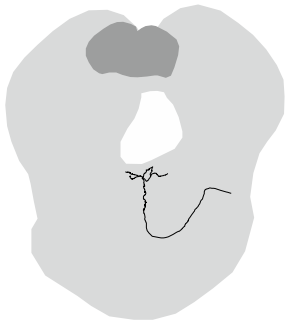

synapses to      synapses from

|                   |   |   |
|-------------------|---|---|
| hugin-PC right 1  | 0 | 0 |
| hugin-PC right 2  | 0 | 0 |
| hugin-PC right 3  | 0 | 0 |
| hugin-PC right 4  | 0 | 0 |
| hugin-PC left 1   | 0 | 0 |
| hugin-PC left 2   | 0 | 0 |
| hugin-PC left 3   | 0 | 0 |
| hugin-PC left 4   | 0 | 0 |
| hugin-RG right 1  | 0 | 0 |
| hugin-RG right 2  | 0 | 0 |
| hugin-RG left 1   | 0 | 0 |
| hugin-RG left 2   | 0 | 0 |
| hugin-VNC right 1 | 2 | 0 |
| hugin-VNC right 2 | 0 | 0 |
| hugin-VNC left 1  | 1 | 0 |
| hugin-VNC left 2  | 1 | 0 |
| hugin-PH right 1  | 0 | 0 |
| hugin-PH right 2  | 0 | 0 |
| hugin-PH left 1   | 0 | 0 |
| hugin-PH left 2   | 0 | 0 |

12.

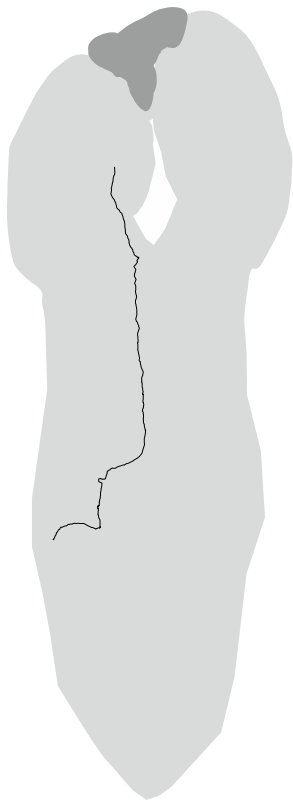

#3915835

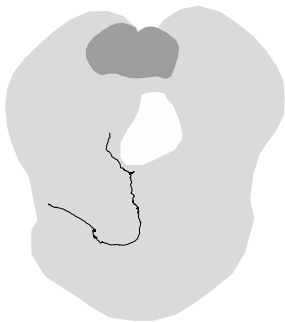

synapses to      synapses from

|                   |   |   |
|-------------------|---|---|
| hugin-PC right 1  | 0 | 0 |
| hugin-PC right 2  | 0 | 0 |
| hugin-PC right 3  | 0 | 0 |
| hugin-PC right 4  | 0 | 0 |
| hugin-PC left 1   | 0 | 0 |
| hugin-PC left 2   | 0 | 0 |
| hugin-PC left 3   | 0 | 0 |
| hugin-PC left 4   | 0 | 0 |
| hugin-RG right 1  | 0 | 0 |
| hugin-RG right 2  | 0 | 0 |
| hugin-RG left 1   | 0 | 0 |
| hugin-RG left 2   | 1 | 0 |
| hugin-VNC right 1 | 0 | 0 |
| hugin-VNC right 2 | 0 | 0 |
| hugin-VNC left 1  | 0 | 0 |
| hugin-VNC left 2  | 0 | 0 |
| hugin-PH right 1  | 0 | 0 |
| hugin-PH right 2  | 0 | 0 |
| hugin-PH left 1   | 0 | 0 |
| hugin-PH left 2   | 0 | 0 |

13.

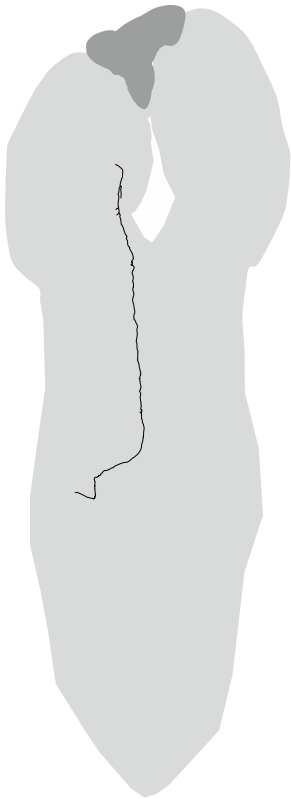

#5617164

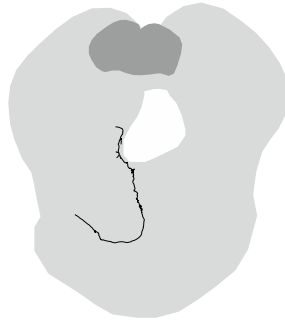

synapses to

synapses from

|                   |   |   |
|-------------------|---|---|
| hugin-PC right 1  | 0 | 0 |
| hugin-PC right 2  | 0 | 0 |
| hugin-PC right 3  | 0 | 0 |
| hugin-PC right 4  | 0 | 0 |
| hugin-PC left 1   | 0 | 0 |
| hugin-PC left 2   | 0 | 0 |
| hugin-PC left 3   | 0 | 0 |
| hugin-PC left 4   | 0 | 0 |
| hugin-RG right 1  | 0 | 0 |
| hugin-RG right 2  | 0 | 0 |
| hugin-RG left 1   | 0 | 0 |
| hugin-RG left 2   | 1 | 0 |
| hugin-VNC right 1 | 0 | 0 |
| hugin-VNC right 2 | 0 | 0 |
| hugin-VNC left 1  | 0 | 0 |
| hugin-VNC left 2  | 0 | 0 |
| hugin-PH right 1  | 0 | 0 |
| hugin-PH right 2  | 0 | 0 |
| hugin-PH left 1   | 0 | 0 |
| hugin-PH left 2   | 0 | 0 |

14.

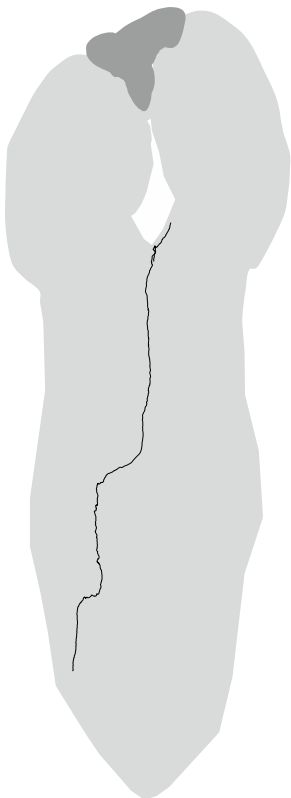

#3795424

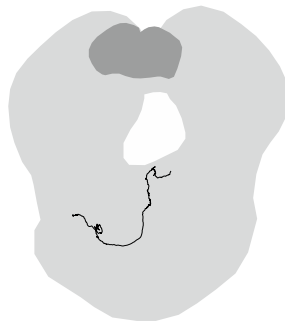

synapses to

synapses from

|                   |   |   |
|-------------------|---|---|
| hugin-PC right 1  | 0 | 0 |
| hugin-PC right 2  | 0 | 0 |
| hugin-PC right 3  | 0 | 0 |
| hugin-PC right 4  | 0 | 0 |
| hugin-PC left 1   | 0 | 0 |
| hugin-PC left 2   | 0 | 0 |
| hugin-PC left 3   | 0 | 0 |
| hugin-PC left 4   | 0 | 0 |
| hugin-RG right 1  | 0 | 0 |
| hugin-RG right 2  | 0 | 0 |
| hugin-RG left 1   | 0 | 0 |
| hugin-RG left 2   | 0 | 0 |
| hugin-VNC right 1 | 1 | 0 |
| hugin-VNC right 2 | 0 | 0 |
| hugin-VNC left 1  | 0 | 0 |
| hugin-VNC left 2  | 0 | 0 |
| hugin-PH right 1  | 0 | 0 |
| hugin-PH right 2  | 0 | 0 |
| hugin-PH left 1   | 0 | 0 |
| hugin-PH left 2   | 0 | 0 |

## J Interneurons

1.

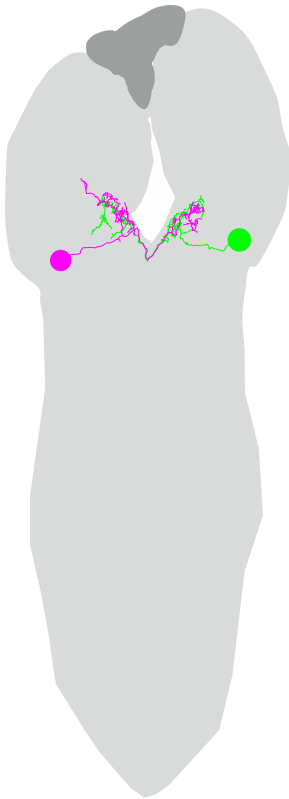

#3613276  
#9787565

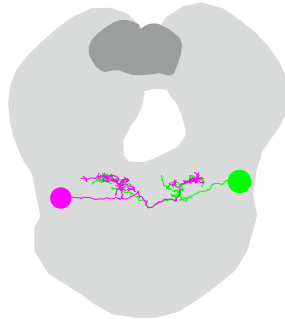

synapses to

synapses from

|                   |   |    |   |   |
|-------------------|---|----|---|---|
| hugin-PC right 1  | 0 | 5  | 2 | 0 |
| hugin-PC right 2  | 0 | 4  | 0 | 1 |
| hugin-PC right 3  | 0 | 2  | 0 | 1 |
| hugin-PC right 4  | 0 | 10 | 1 | 1 |
| hugin-PC left 1   | 4 | 0  | 0 | 0 |
| hugin-PC left 2   | 3 | 0  | 0 | 0 |
| hugin-PC left 3   | 4 | 0  | 1 | 0 |
| hugin-PC left 4   | 9 | 1  | 2 | 0 |
| hugin-RG right 1  | 0 | 0  | 0 | 0 |
| hugin-RG right 2  | 0 | 0  | 0 | 0 |
| hugin-RG left 1   | 0 | 0  | 0 | 0 |
| hugin-RG left 2   | 0 | 0  | 0 | 0 |
| hugin-VNC right 1 | 0 | 0  | 0 | 0 |
| hugin-VNC right 2 | 0 | 0  | 0 | 0 |
| hugin-VNC left 1  | 0 | 0  | 0 | 0 |
| hugin-VNC left 2  | 0 | 0  | 0 | 0 |
| hugin-PH right 1  | 0 | 0  | 0 | 0 |
| hugin-PH right 2  | 0 | 0  | 0 | 0 |
| hugin-PH left 1   | 0 | 0  | 0 | 0 |
| hugin-PH left 2   | 0 | 0  | 0 | 0 |

2.

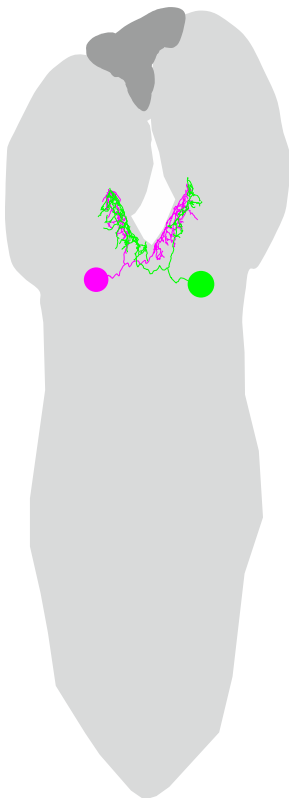

#15242799  
#9793489

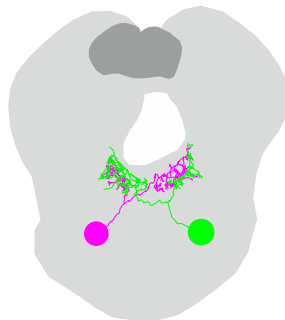

synapses to

synapses from

|                   |   |   |   |   |
|-------------------|---|---|---|---|
| hugin-PC right 1  | 0 | 0 | 0 | 0 |
| hugin-PC right 2  | 0 | 0 | 2 | 1 |
| hugin-PC right 3  | 1 | 0 | 0 | 0 |
| hugin-PC right 4  | 0 | 0 | 1 | 1 |
| hugin-PC left 1   | 1 | 0 | 3 | 2 |
| hugin-PC left 2   | 0 | 0 | 1 | 1 |
| hugin-PC left 3   | 1 | 1 | 0 | 3 |
| hugin-PC left 4   | 0 | 1 | 0 | 1 |
| hugin-RG right 1  | 0 | 0 | 0 | 0 |
| hugin-RG right 2  | 0 | 0 | 0 | 0 |
| hugin-RG left 1   | 0 | 0 | 0 | 0 |
| hugin-RG left 2   | 0 | 0 | 0 | 0 |
| hugin-VNC right 1 | 0 | 0 | 0 | 0 |
| hugin-VNC right 2 | 0 | 0 | 0 | 0 |
| hugin-VNC left 1  | 0 | 0 | 0 | 0 |
| hugin-VNC left 2  | 0 | 0 | 0 | 0 |
| hugin-PH right 1  | 0 | 0 | 0 | 0 |
| hugin-PH right 2  | 0 | 0 | 0 | 0 |
| hugin-PH left 1   | 0 | 0 | 0 | 0 |
| hugin-PH left 2   | 0 | 0 | 0 | 0 |

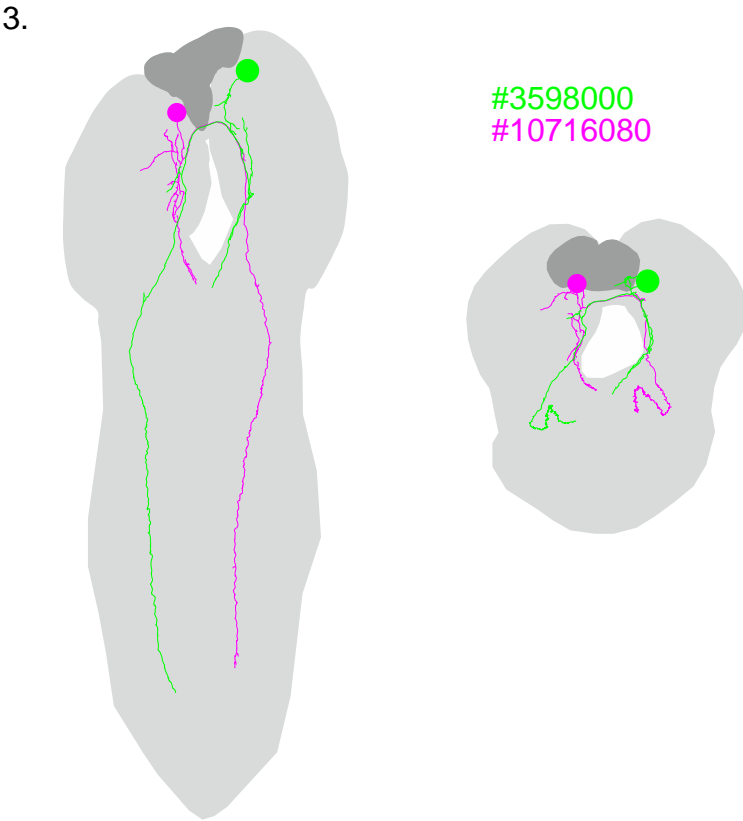

|                   | synapses to |   | synapses from |   |
|-------------------|-------------|---|---------------|---|
| hugin-PC right 1  | 0           | 0 | 0             | 0 |
| hugin-PC right 2  | 0           | 0 | 0             | 0 |
| hugin-PC right 3  | 0           | 0 | 0             | 0 |
| hugin-PC right 4  | 0           | 0 | 0             | 0 |
| hugin-PC left 1   | 0           | 0 | 0             | 0 |
| hugin-PC left 2   | 0           | 0 | 0             | 0 |
| hugin-PC left 3   | 0           | 0 | 0             | 0 |
| hugin-PC left 4   | 0           | 0 | 0             | 0 |
| hugin-RG right 1  | 0           | 0 | 0             | 0 |
| hugin-RG right 2  | 0           | 0 | 0             | 0 |
| hugin-RG left 1   | 0           | 0 | 0             | 0 |
| hugin-RG left 2   | 0           | 0 | 0             | 0 |
| hugin-VNC right 1 | 4           | 0 | 0             | 0 |
| hugin-VNC right 2 | 5           | 0 | 0             | 0 |
| hugin-VNC left 1  | 0           | 5 | 0             | 0 |
| hugin-VNC left 2  | 0           | 3 | 0             | 0 |
| hugin-PH right 1  | 0           | 0 | 0             | 0 |
| hugin-PH right 2  | 0           | 0 | 0             | 0 |
| hugin-PH left 1   | 0           | 0 | 0             | 0 |
| hugin-PH left 2   | 0           | 0 | 0             | 0 |

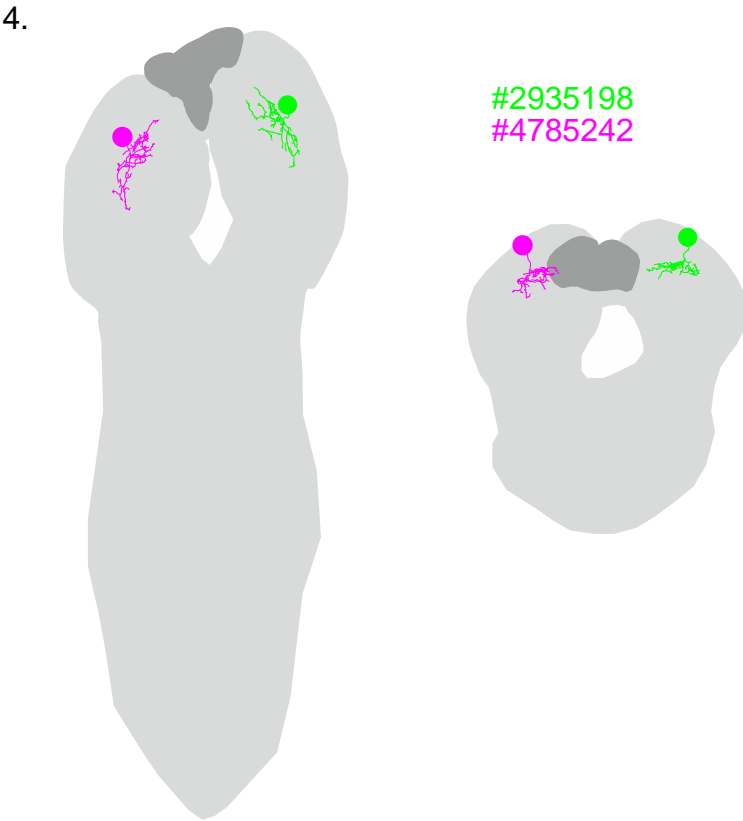

|                   | synapses to |   | synapses from |   |
|-------------------|-------------|---|---------------|---|
| hugin-PC right 1  | 0           | 0 | 0             | 0 |
| hugin-PC right 2  | 1           | 0 | 0             | 0 |
| hugin-PC right 3  | 0           | 0 | 0             | 0 |
| hugin-PC right 4  | 6           | 0 | 2             | 0 |
| hugin-PC left 1   | 0           | 2 | 0             | 0 |
| hugin-PC left 2   | 0           | 3 | 0             | 1 |
| hugin-PC left 3   | 0           | 0 | 0             | 0 |
| hugin-PC left 4   | 0           | 2 | 0             | 0 |
| hugin-RG right 1  | 0           | 0 | 0             | 0 |
| hugin-RG right 2  | 0           | 0 | 0             | 0 |
| hugin-RG left 1   | 0           | 0 | 0             | 0 |
| hugin-RG left 2   | 0           | 0 | 0             | 0 |
| hugin-VNC right 1 | 0           | 0 | 0             | 0 |
| hugin-VNC right 2 | 0           | 0 | 0             | 0 |
| hugin-VNC left 1  | 0           | 0 | 0             | 0 |
| hugin-VNC left 2  | 0           | 0 | 0             | 0 |
| hugin-PH right 1  | 0           | 0 | 0             | 0 |
| hugin-PH right 2  | 0           | 0 | 0             | 0 |
| hugin-PH left 1   | 0           | 0 | 0             | 0 |
| hugin-PH left 2   | 0           | 0 | 0             | 0 |

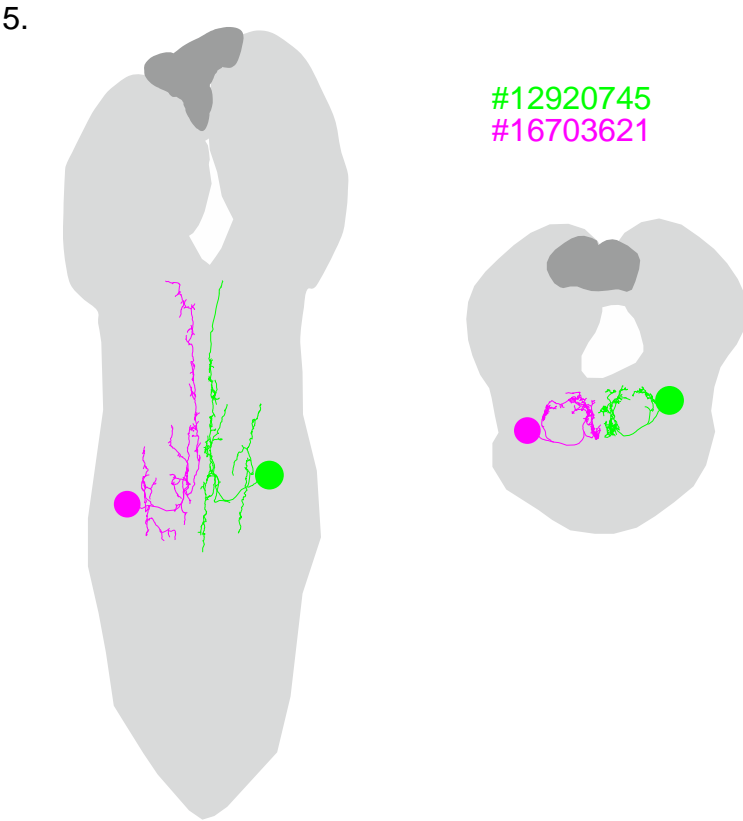

|                   | synapses to |   | synapses from |   |
|-------------------|-------------|---|---------------|---|
| hugin-PC right 1  | 0           | 0 | 0             | 0 |
| hugin-PC right 2  | 0           | 0 | 0             | 0 |
| hugin-PC right 3  | 0           | 0 | 0             | 0 |
| hugin-PC right 4  | 0           | 0 | 0             | 0 |
| hugin-PC left 1   | 0           | 0 | 0             | 0 |
| hugin-PC left 2   | 0           | 0 | 0             | 0 |
| hugin-PC left 3   | 0           | 0 | 0             | 0 |
| hugin-PC left 4   | 0           | 0 | 0             | 0 |
| hugin-RG right 1  | 0           | 0 | 0             | 0 |
| hugin-RG right 2  | 0           | 0 | 0             | 0 |
| hugin-RG left 1   | 0           | 0 | 0             | 0 |
| hugin-RG left 2   | 0           | 0 | 0             | 0 |
| hugin-VNC right 1 | 0           | 0 | 0             | 5 |
| hugin-VNC right 2 | 0           | 0 | 0             | 3 |
| hugin-VNC left 1  | 0           | 0 | 5             | 0 |
| hugin-VNC left 2  | 0           | 0 | 2             | 0 |
| hugin-PH right 1  | 0           | 0 | 0             | 0 |
| hugin-PH right 2  | 0           | 0 | 0             | 0 |
| hugin-PH left 1   | 0           | 0 | 0             | 0 |
| hugin-PH left 2   | 0           | 0 | 0             | 0 |

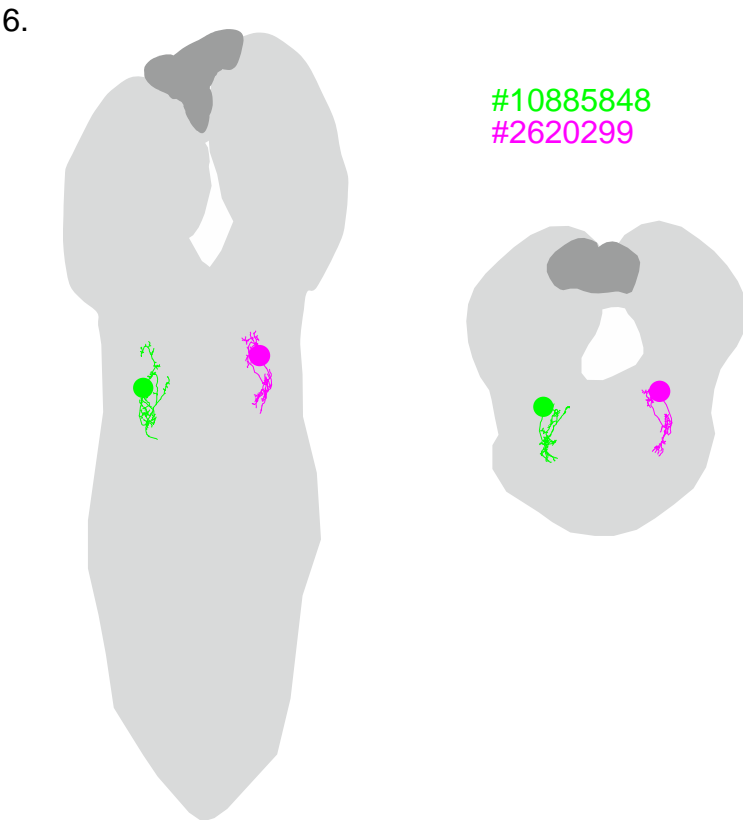

|                   | synapses to |   | synapses from |   |
|-------------------|-------------|---|---------------|---|
| hugin-PC right 1  | 0           | 0 | 0             | 0 |
| hugin-PC right 2  | 0           | 0 | 0             | 0 |
| hugin-PC right 3  | 0           | 0 | 0             | 0 |
| hugin-PC right 4  | 0           | 0 | 0             | 0 |
| hugin-PC left 1   | 0           | 0 | 0             | 0 |
| hugin-PC left 2   | 0           | 0 | 0             | 0 |
| hugin-PC left 3   | 0           | 0 | 0             | 0 |
| hugin-PC left 4   | 0           | 0 | 0             | 0 |
| hugin-RG right 1  | 0           | 0 | 0             | 0 |
| hugin-RG right 2  | 0           | 0 | 0             | 0 |
| hugin-RG left 1   | 0           | 0 | 0             | 0 |
| hugin-RG left 2   | 0           | 0 | 0             | 0 |
| hugin-VNC right 1 | 0           | 0 | 4             | 0 |
| hugin-VNC right 2 | 0           | 0 | 2             | 0 |
| hugin-VNC left 1  | 0           | 0 | 0             | 4 |
| hugin-VNC left 2  | 0           | 0 | 0             | 3 |
| hugin-PH right 1  | 0           | 0 | 0             | 0 |
| hugin-PH right 2  | 0           | 0 | 0             | 0 |
| hugin-PH left 1   | 0           | 0 | 0             | 0 |
| hugin-PH left 2   | 0           | 0 | 0             | 0 |

7.

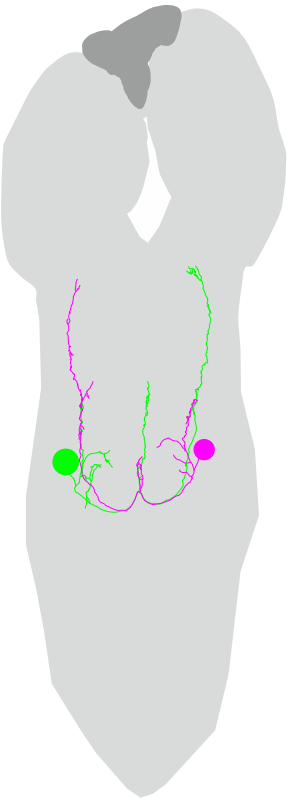

#4179669  
#2632168

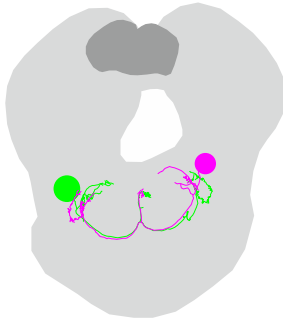

synapses to

synapses from

|                   |   |   |   |   |
|-------------------|---|---|---|---|
| hugin-PC right 1  | 0 | 0 | 0 | 0 |
| hugin-PC right 2  | 0 | 0 | 0 | 0 |
| hugin-PC right 3  | 0 | 0 | 0 | 0 |
| hugin-PC right 4  | 0 | 0 | 0 | 0 |
| hugin-PC left 1   | 0 | 0 | 0 | 0 |
| hugin-PC left 2   | 0 | 0 | 0 | 0 |
| hugin-PC left 3   | 0 | 0 | 0 | 0 |
| hugin-PC left 4   | 0 | 0 | 0 | 0 |
| hugin-RG right 1  | 0 | 0 | 0 | 0 |
| hugin-RG right 2  | 0 | 0 | 0 | 0 |
| hugin-RG left 1   | 0 | 0 | 0 | 0 |
| hugin-RG left 2   | 0 | 0 | 0 | 0 |
| hugin-VNC right 1 | 0 | 1 | 2 | 1 |
| hugin-VNC right 2 | 0 | 1 | 1 | 0 |
| hugin-VNC left 1  | 0 | 0 | 1 | 2 |
| hugin-VNC left 2  | 4 | 0 | 1 | 2 |
| hugin-PH right 1  | 0 | 0 | 0 | 0 |
| hugin-PH right 2  | 0 | 0 | 0 | 0 |
| hugin-PH left 1   | 0 | 0 | 0 | 0 |
| hugin-PH left 2   | 0 | 0 | 0 | 0 |

8.

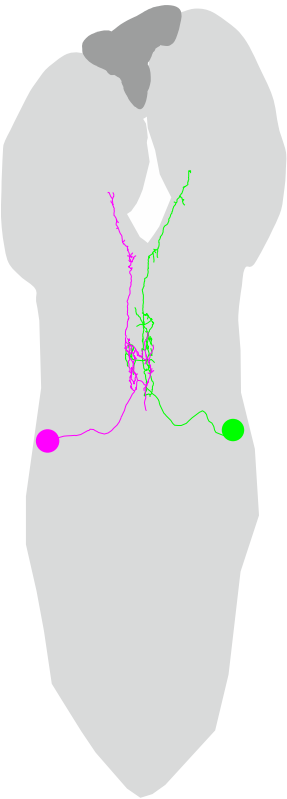

#5613144  
#7381964

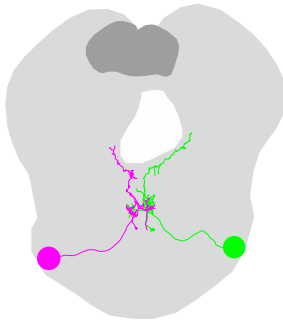

synapses to

synapses from

|                   |    |    |   |   |
|-------------------|----|----|---|---|
| hugin-PC right 1  | 0  | 0  | 0 | 0 |
| hugin-PC right 2  | 0  | 0  | 0 | 0 |
| hugin-PC right 3  | 0  | 0  | 0 | 0 |
| hugin-PC right 4  | 0  | 0  | 0 | 0 |
| hugin-PC left 1   | 0  | 0  | 0 | 0 |
| hugin-PC left 2   | 0  | 0  | 0 | 0 |
| hugin-PC left 3   | 0  | 1  | 0 | 0 |
| hugin-PC left 4   | 0  | 0  | 0 | 0 |
| hugin-RG right 1  | 12 | 4  | 0 | 0 |
| hugin-RG right 2  | 15 | 6  | 0 | 0 |
| hugin-RG left 1   | 6  | 9  | 0 | 0 |
| hugin-RG left 2   | 6  | 14 | 0 | 0 |
| hugin-VNC right 1 | 0  | 0  | 0 | 0 |
| hugin-VNC right 2 | 0  | 1  | 0 | 0 |
| hugin-VNC left 1  | 0  | 0  | 0 | 0 |
| hugin-VNC left 2  | 0  | 0  | 0 | 0 |
| hugin-PH right 1  | 0  | 1  | 0 | 0 |
| hugin-PH right 2  | 0  | 1  | 0 | 0 |
| hugin-PH left 1   | 0  | 0  | 0 | 0 |
| hugin-PH left 2   | 0  | 0  | 0 | 0 |

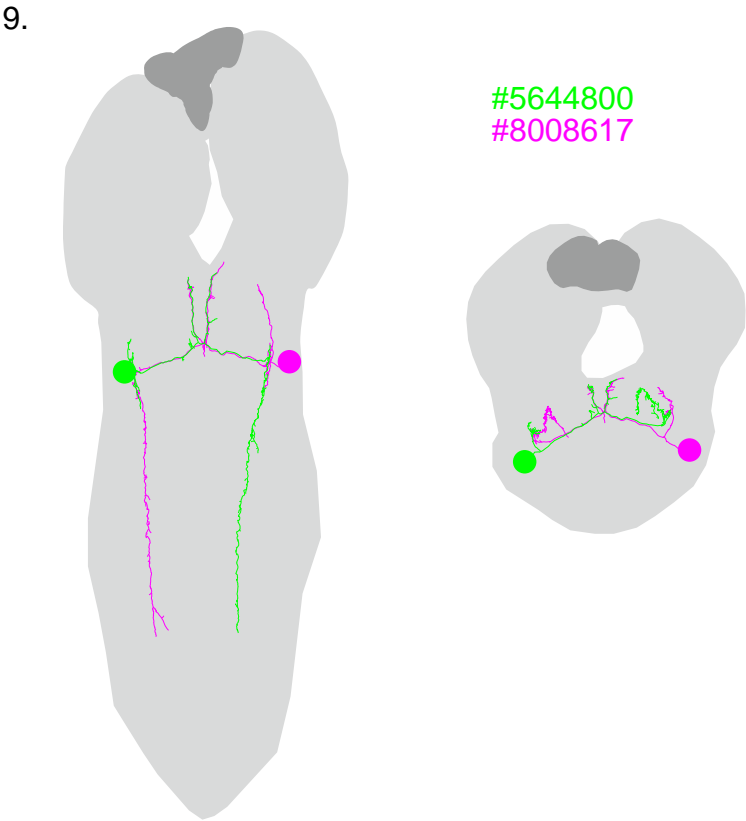

|                   | synapses to |   | synapses from |   |
|-------------------|-------------|---|---------------|---|
| hugin-PC right 1  | 0           | 0 | 0             | 0 |
| hugin-PC right 2  | 0           | 0 | 0             | 0 |
| hugin-PC right 3  | 0           | 0 | 0             | 0 |
| hugin-PC right 4  | 0           | 0 | 0             | 0 |
| hugin-PC left 1   | 0           | 0 | 0             | 0 |
| hugin-PC left 2   | 0           | 0 | 0             | 0 |
| hugin-PC left 3   | 0           | 0 | 0             | 0 |
| hugin-PC left 4   | 0           | 0 | 0             | 0 |
| hugin-RG right 1  | 0           | 0 | 0             | 0 |
| hugin-RG right 2  | 0           | 0 | 0             | 0 |
| hugin-RG left 1   | 0           | 0 | 0             | 0 |
| hugin-RG left 2   | 0           | 0 | 0             | 0 |
| hugin-VNC right 1 | 0           | 1 | 4             | 5 |
| hugin-VNC right 2 | 0           | 0 | 2             | 3 |
| hugin-VNC left 1  | 1           | 0 | 7             | 4 |
| hugin-VNC left 2  | 1           | 0 | 5             | 6 |
| hugin-PH right 1  | 0           | 0 | 0             | 0 |
| hugin-PH right 2  | 0           | 0 | 0             | 0 |
| hugin-PH left 1   | 0           | 0 | 0             | 0 |
| hugin-PH left 2   | 0           | 0 | 0             | 0 |

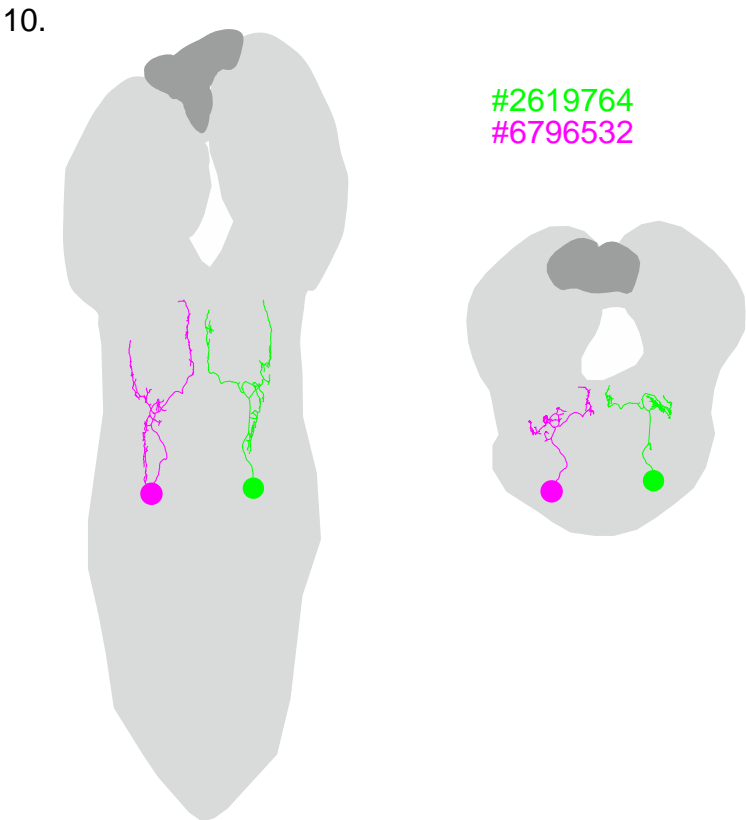

|                   | synapses to |   | synapses from |   |
|-------------------|-------------|---|---------------|---|
| hugin-PC right 1  | 0           | 0 | 0             | 0 |
| hugin-PC right 2  | 0           | 0 | 0             | 0 |
| hugin-PC right 3  | 0           | 0 | 0             | 0 |
| hugin-PC right 4  | 0           | 0 | 0             | 0 |
| hugin-PC left 1   | 0           | 0 | 0             | 0 |
| hugin-PC left 2   | 0           | 0 | 0             | 0 |
| hugin-PC left 3   | 0           | 0 | 0             | 0 |
| hugin-PC left 4   | 0           | 0 | 0             | 0 |
| hugin-RG right 1  | 0           | 0 | 0             | 0 |
| hugin-RG right 2  | 0           | 0 | 0             | 0 |
| hugin-RG left 1   | 0           | 0 | 0             | 0 |
| hugin-RG left 2   | 0           | 0 | 0             | 0 |
| hugin-VNC right 1 | 0           | 0 | 0             | 7 |
| hugin-VNC right 2 | 0           | 0 | 0             | 4 |
| hugin-VNC left 1  | 0           | 0 | 1             | 0 |
| hugin-VNC left 2  | 0           | 0 | 3             | 0 |
| hugin-PH right 1  | 0           | 0 | 0             | 0 |
| hugin-PH right 2  | 0           | 0 | 0             | 0 |
| hugin-PH left 1   | 0           | 0 | 0             | 0 |
| hugin-PH left 2   | 0           | 0 | 0             | 0 |



11.

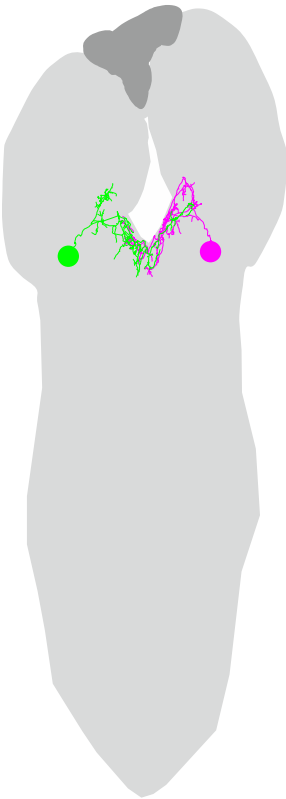

#4364826  
#16575803

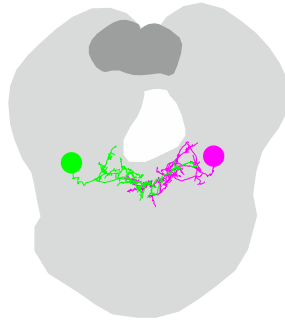

synapses to

synapses from

|                   |   |   |   |   |
|-------------------|---|---|---|---|
| hugin-PC right 1  | 0 | 3 | 0 | 0 |
| hugin-PC right 2  | 0 | 0 | 0 | 0 |
| hugin-PC right 3  | 4 | 0 | 0 | 0 |
| hugin-PC right 4  | 2 | 3 | 1 | 3 |
| hugin-PC left 1   | 2 | 2 | 3 | 1 |
| hugin-PC left 2   | 2 | 4 | 0 | 0 |
| hugin-PC left 3   | 0 | 0 | 0 | 2 |
| hugin-PC left 4   | 0 | 2 | 0 | 0 |
| hugin-RG right 1  | 0 | 0 | 0 | 0 |
| hugin-RG right 2  | 0 | 0 | 0 | 0 |
| hugin-RG left 1   | 0 | 0 | 0 | 0 |
| hugin-RG left 2   | 0 | 0 | 0 | 0 |
| hugin-VNC right 1 | 0 | 0 | 0 | 0 |
| hugin-VNC right 2 | 0 | 0 | 0 | 0 |
| hugin-VNC left 1  | 0 | 0 | 0 | 0 |
| hugin-VNC left 2  | 0 | 0 | 0 | 0 |
| hugin-PH right 1  | 0 | 0 | 0 | 0 |
| hugin-PH right 2  | 0 | 0 | 0 | 0 |
| hugin-PH left 1   | 0 | 0 | 0 | 0 |
| hugin-PH left 2   | 0 | 0 | 0 | 0 |

12.

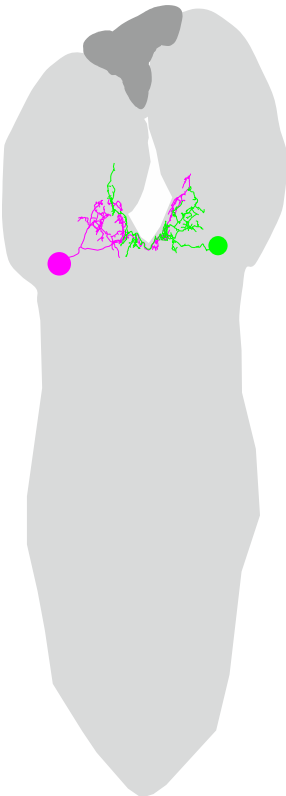

#9455820  
#9903957

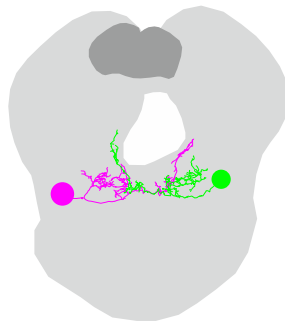

synapses to

synapses from

|                   |   |   |   |   |
|-------------------|---|---|---|---|
| hugin-PC right 1  | 0 | 2 | 2 | 0 |
| hugin-PC right 2  | 0 | 1 | 0 | 0 |
| hugin-PC right 3  | 0 | 2 | 2 | 0 |
| hugin-PC right 4  | 0 | 1 | 2 | 0 |
| hugin-PC left 1   | 4 | 0 | 1 | 0 |
| hugin-PC left 2   | 2 | 0 | 1 | 1 |
| hugin-PC left 3   | 5 | 0 | 2 | 1 |
| hugin-PC left 4   | 5 | 1 | 0 | 1 |
| hugin-RG right 1  | 0 | 0 | 0 | 0 |
| hugin-RG right 2  | 0 | 0 | 0 | 0 |
| hugin-RG left 1   | 0 | 0 | 0 | 0 |
| hugin-RG left 2   | 0 | 0 | 0 | 0 |
| hugin-VNC right 1 | 0 | 0 | 0 | 0 |
| hugin-VNC right 2 | 0 | 0 | 0 | 0 |
| hugin-VNC left 1  | 0 | 0 | 0 | 0 |
| hugin-VNC left 2  | 0 | 0 | 0 | 0 |
| hugin-PH right 1  | 0 | 0 | 0 | 0 |
| hugin-PH right 2  | 0 | 0 | 0 | 0 |
| hugin-PH left 1   | 0 | 0 | 0 | 0 |
| hugin-PH left 2   | 0 | 0 | 0 | 0 |

13.

synapses to      synapses from

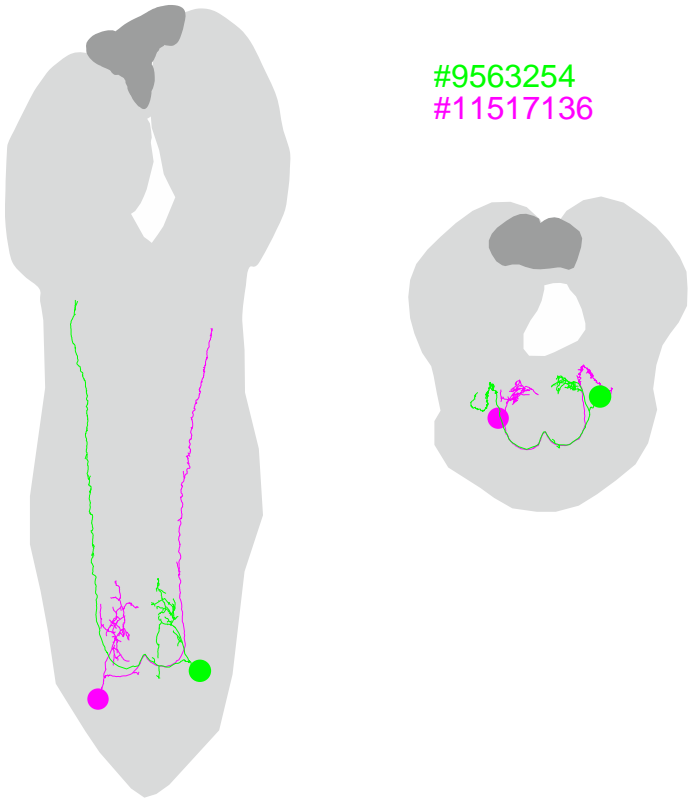

|                   |   |   |   |   |
|-------------------|---|---|---|---|
| hugin-PC right 1  | 0 | 0 | 0 | 0 |
| hugin-PC right 2  | 0 | 0 | 0 | 0 |
| hugin-PC right 3  | 0 | 0 | 0 | 0 |
| hugin-PC right 4  | 0 | 0 | 0 | 0 |
| hugin-PC left 1   | 0 | 0 | 0 | 0 |
| hugin-PC left 2   | 0 | 0 | 0 | 0 |
| hugin-PC left 3   | 0 | 0 | 0 | 0 |
| hugin-PC left 4   | 0 | 0 | 0 | 0 |
| hugin-RG right 1  | 0 | 0 | 0 | 0 |
| hugin-RG right 2  | 0 | 0 | 0 | 0 |
| hugin-RG left 1   | 0 | 0 | 0 | 0 |
| hugin-RG left 2   | 0 | 0 | 0 | 0 |
| hugin-VNC right 1 | 1 | 0 | 3 | 0 |
| hugin-VNC right 2 | 4 | 0 | 0 | 0 |
| hugin-VNC left 1  | 0 | 6 | 0 | 1 |
| hugin-VNC left 2  | 0 | 1 | 0 | 1 |
| hugin-PH right 1  | 0 | 0 | 0 | 0 |
| hugin-PH right 2  | 0 | 0 | 0 | 0 |
| hugin-PH left 1   | 0 | 0 | 0 | 0 |
| hugin-PH left 2   | 0 | 0 | 0 | 0 |

14.

synapses to      synapses from

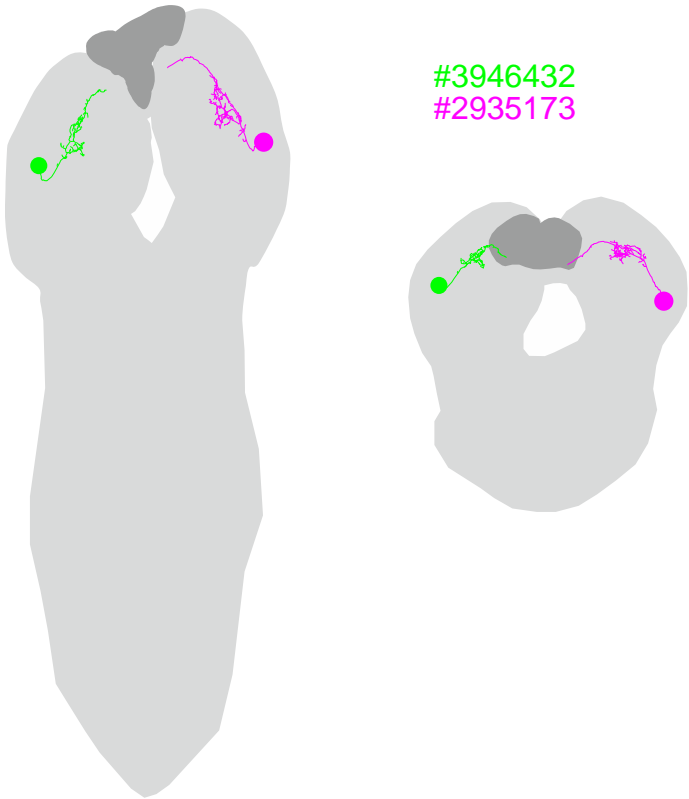

|                   |   |   |   |   |
|-------------------|---|---|---|---|
| hugin-PC right 1  | 0 | 4 | 0 | 0 |
| hugin-PC right 2  | 0 | 2 | 0 | 0 |
| hugin-PC right 3  | 0 | 0 | 0 | 0 |
| hugin-PC right 4  | 0 | 3 | 0 | 1 |
| hugin-PC left 1   | 0 | 0 | 0 | 0 |
| hugin-PC left 2   | 5 | 0 | 0 | 0 |
| hugin-PC left 3   | 0 | 0 | 0 | 0 |
| hugin-PC left 4   | 0 | 0 | 0 | 0 |
| hugin-RG right 1  | 0 | 0 | 0 | 0 |
| hugin-RG right 2  | 0 | 0 | 0 | 0 |
| hugin-RG left 1   | 0 | 0 | 0 | 0 |
| hugin-RG left 2   | 0 | 0 | 0 | 0 |
| hugin-VNC right 1 | 0 | 0 | 0 | 0 |
| hugin-VNC right 2 | 0 | 0 | 0 | 0 |
| hugin-VNC left 1  | 0 | 0 | 0 | 0 |
| hugin-VNC left 2  | 0 | 0 | 0 | 0 |
| hugin-PH right 1  | 0 | 0 | 0 | 0 |
| hugin-PH right 2  | 0 | 0 | 0 | 0 |
| hugin-PH left 1   | 0 | 0 | 0 | 0 |
| hugin-PH left 2   | 0 | 0 | 0 | 0 |

15.

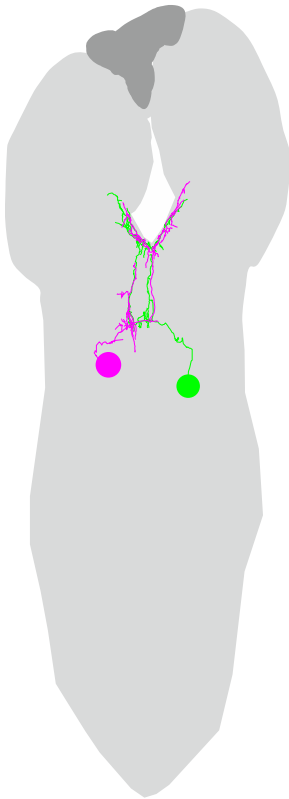

#5349961  
#5404887

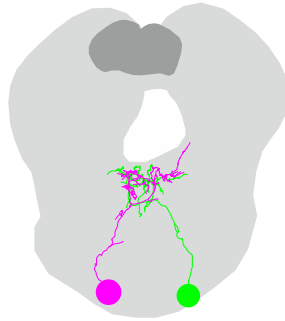

synapses to

synapses from

|                   |   |   |   |   |
|-------------------|---|---|---|---|
| hugin-PC right 1  | 0 | 0 | 0 | 0 |
| hugin-PC right 2  | 0 | 0 | 0 | 0 |
| hugin-PC right 3  | 0 | 0 | 0 | 0 |
| hugin-PC right 4  | 0 | 1 | 0 | 0 |
| hugin-PC left 1   | 0 | 0 | 1 | 0 |
| hugin-PC left 2   | 0 | 1 | 0 | 1 |
| hugin-PC left 3   | 0 | 0 | 0 | 0 |
| hugin-PC left 4   | 0 | 0 | 0 | 0 |
| hugin-RG right 1  | 0 | 0 | 0 | 0 |
| hugin-RG right 2  | 0 | 0 | 0 | 0 |
| hugin-RG left 1   | 0 | 0 | 0 | 0 |
| hugin-RG left 2   | 0 | 0 | 0 | 0 |
| hugin-VNC right 1 | 1 | 5 | 0 | 0 |
| hugin-VNC right 2 | 3 | 2 | 0 | 0 |
| hugin-VNC left 1  | 3 | 4 | 0 | 0 |
| hugin-VNC left 2  | 1 | 0 | 0 | 0 |
| hugin-PH right 1  | 0 | 0 | 0 | 0 |
| hugin-PH right 2  | 0 | 0 | 0 | 0 |
| hugin-PH left 1   | 0 | 0 | 0 | 0 |
| hugin-PH left 2   | 0 | 0 | 0 | 0 |

16.

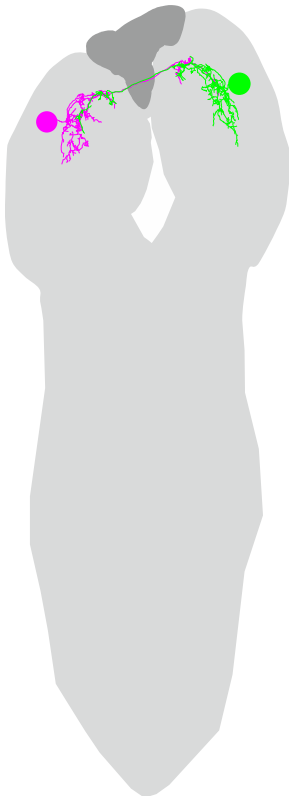

#10119916  
#2369444

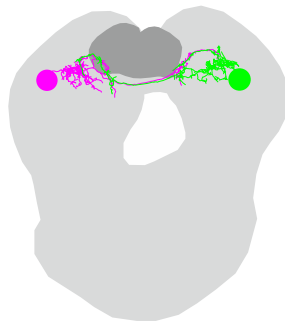

synapses to

synapses from

|                   |    |    |   |   |
|-------------------|----|----|---|---|
| hugin-PC right 1  | 9  | 12 | 1 | 0 |
| hugin-PC right 2  | 4  | 6  | 0 | 1 |
| hugin-PC right 3  | 6  | 4  | 0 | 0 |
| hugin-PC right 4  | 13 | 7  | 2 | 3 |
| hugin-PC left 1   | 12 | 4  | 1 | 3 |
| hugin-PC left 2   | 7  | 10 | 1 | 2 |
| hugin-PC left 3   | 3  | 0  | 0 | 2 |
| hugin-PC left 4   | 7  | 8  | 2 | 1 |
| hugin-RG right 1  | 0  | 0  | 0 | 0 |
| hugin-RG right 2  | 0  | 0  | 0 | 0 |
| hugin-RG left 1   | 0  | 0  | 0 | 0 |
| hugin-RG left 2   | 0  | 0  | 0 | 0 |
| hugin-VNC right 1 | 0  | 0  | 0 | 0 |
| hugin-VNC right 2 | 0  | 0  | 0 | 0 |
| hugin-VNC left 1  | 0  | 0  | 0 | 0 |
| hugin-VNC left 2  | 0  | 0  | 0 | 0 |
| hugin-PH right 1  | 0  | 0  | 0 | 0 |
| hugin-PH right 2  | 0  | 0  | 0 | 0 |
| hugin-PH left 1   | 0  | 0  | 0 | 0 |
| hugin-PH left 2   | 0  | 0  | 0 | 0 |

17.

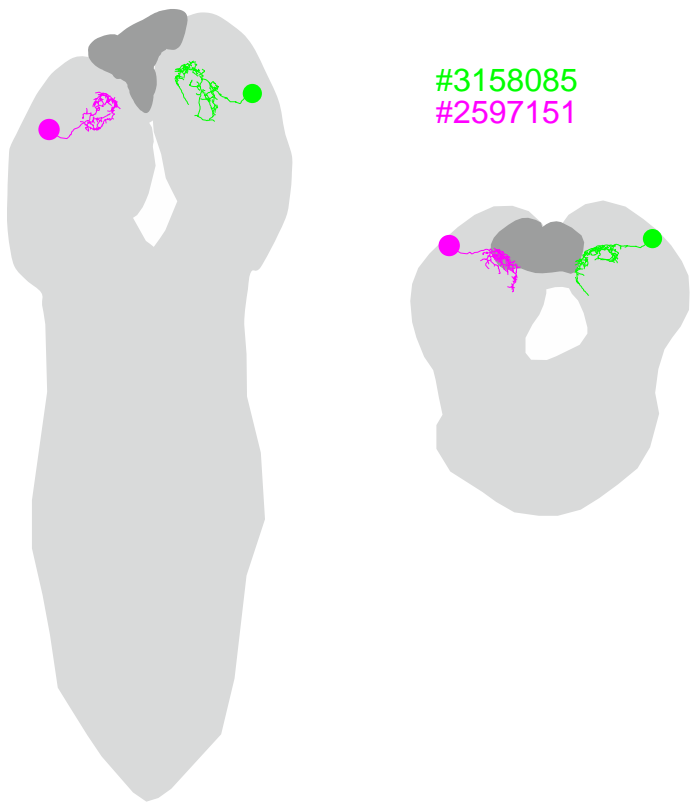

synapses to      synapses from

|                   |   |   |   |   |
|-------------------|---|---|---|---|
| hugin-PC right 1  | 5 | 0 | 1 | 0 |
| hugin-PC right 2  | 2 | 0 | 0 | 0 |
| hugin-PC right 3  | 2 | 0 | 0 | 0 |
| hugin-PC right 4  | 1 | 0 | 1 | 0 |
| hugin-PC left 1   | 0 | 9 | 0 | 0 |
| hugin-PC left 2   | 0 | 7 | 0 | 3 |
| hugin-PC left 3   | 0 | 3 | 0 | 0 |
| hugin-PC left 4   | 0 | 5 | 0 | 0 |
| hugin-RG right 1  | 0 | 0 | 0 | 0 |
| hugin-RG right 2  | 0 | 0 | 0 | 0 |
| hugin-RG left 1   | 0 | 0 | 0 | 0 |
| hugin-RG left 2   | 0 | 0 | 0 | 0 |
| hugin-VNC right 1 | 0 | 0 | 0 | 0 |
| hugin-VNC right 2 | 0 | 0 | 0 | 0 |
| hugin-VNC left 1  | 0 | 0 | 0 | 0 |
| hugin-VNC left 2  | 0 | 0 | 0 | 0 |
| hugin-PH right 1  | 0 | 0 | 0 | 0 |
| hugin-PH right 2  | 0 | 0 | 0 | 0 |
| hugin-PH left 1   | 0 | 0 | 0 | 0 |
| hugin-PH left 2   | 0 | 0 | 0 | 0 |

18.

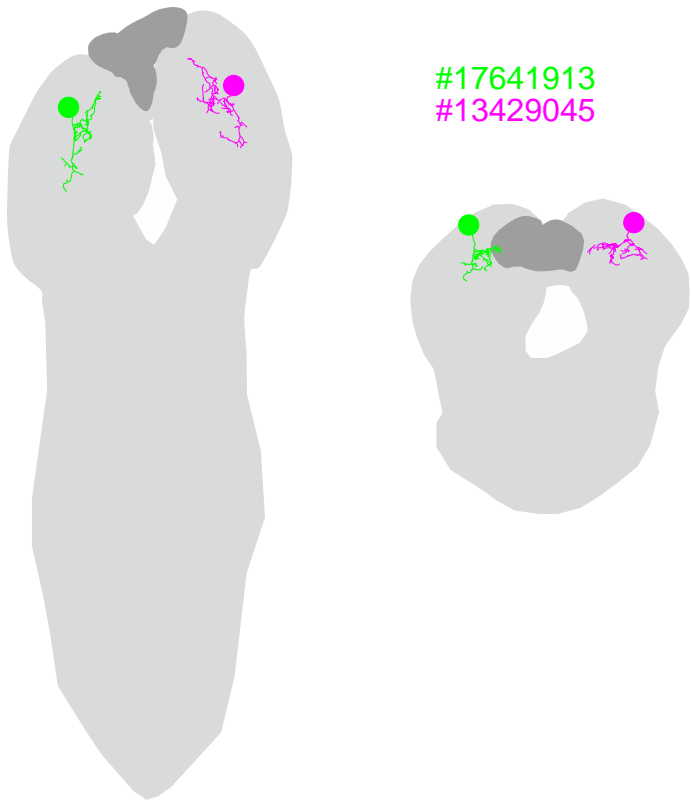

synapses to      synapses from

|                   |   |   |   |   |
|-------------------|---|---|---|---|
| hugin-PC right 1  | 0 | 1 | 0 | 0 |
| hugin-PC right 2  | 0 | 2 | 0 | 0 |
| hugin-PC right 3  | 0 | 0 | 0 | 0 |
| hugin-PC right 4  | 0 | 2 | 0 | 2 |
| hugin-PC left 1   | 2 | 0 | 1 | 0 |
| hugin-PC left 2   | 4 | 0 | 2 | 0 |
| hugin-PC left 3   | 0 | 0 | 0 | 0 |
| hugin-PC left 4   | 3 | 0 | 4 | 0 |
| hugin-RG right 1  | 0 | 0 | 0 | 0 |
| hugin-RG right 2  | 0 | 0 | 0 | 0 |
| hugin-RG left 1   | 0 | 0 | 0 | 0 |
| hugin-RG left 2   | 0 | 0 | 0 | 0 |
| hugin-VNC right 1 | 0 | 0 | 0 | 0 |
| hugin-VNC right 2 | 0 | 0 | 0 | 0 |
| hugin-VNC left 1  | 0 | 0 | 0 | 0 |
| hugin-VNC left 2  | 0 | 0 | 0 | 0 |
| hugin-PH right 1  | 0 | 0 | 0 | 0 |
| hugin-PH right 2  | 0 | 0 | 0 | 0 |
| hugin-PH left 1   | 0 | 0 | 0 | 0 |
| hugin-PH left 2   | 0 | 0 | 0 | 0 |

19.

synapses to      synapses from

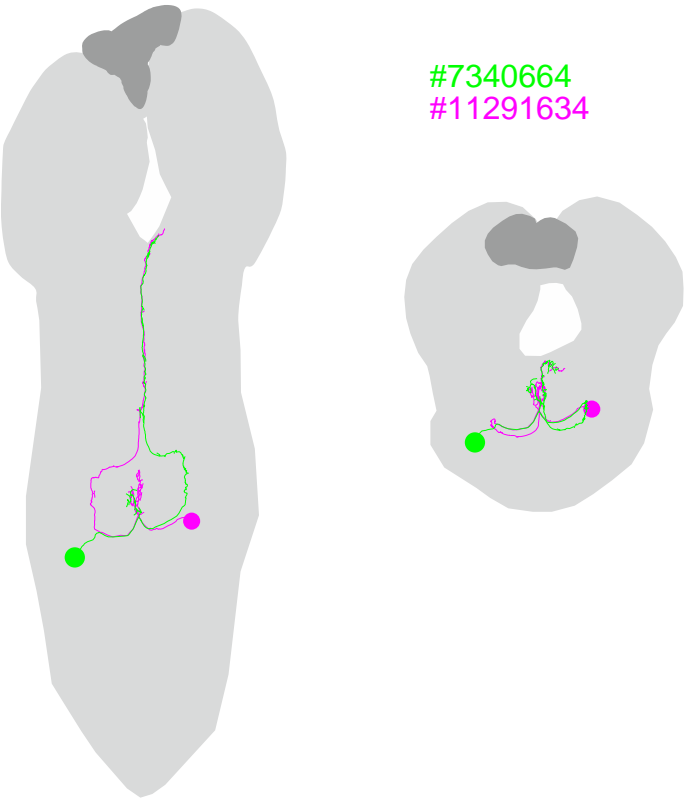

|                   |   |   |   |   |
|-------------------|---|---|---|---|
| hugin-PC right 1  | 0 | 0 | 0 | 0 |
| hugin-PC right 2  | 0 | 0 | 0 | 0 |
| hugin-PC right 3  | 0 | 0 | 0 | 0 |
| hugin-PC right 4  | 0 | 0 | 0 | 0 |
| hugin-PC left 1   | 0 | 0 | 0 | 0 |
| hugin-PC left 2   | 0 | 0 | 0 | 0 |
| hugin-PC left 3   | 0 | 0 | 0 | 0 |
| hugin-PC left 4   | 0 | 0 | 0 | 0 |
| hugin-RG right 1  | 1 | 0 | 0 | 0 |
| hugin-RG right 2  | 0 | 0 | 0 | 0 |
| hugin-RG left 1   | 0 | 0 | 0 | 0 |
| hugin-RG left 2   | 0 | 0 | 0 | 0 |
| hugin-VNC right 1 | 2 | 4 | 0 | 0 |
| hugin-VNC right 2 | 0 | 0 | 0 | 0 |
| hugin-VNC left 1  | 3 | 2 | 0 | 0 |
| hugin-VNC left 2  | 1 | 2 | 0 | 0 |
| hugin-PH right 1  | 0 | 0 | 0 | 0 |
| hugin-PH right 2  | 0 | 0 | 0 | 0 |
| hugin-PH left 1   | 0 | 0 | 0 | 0 |
| hugin-PH left 2   | 0 | 0 | 0 | 0 |

20.

synapses to      synapses from

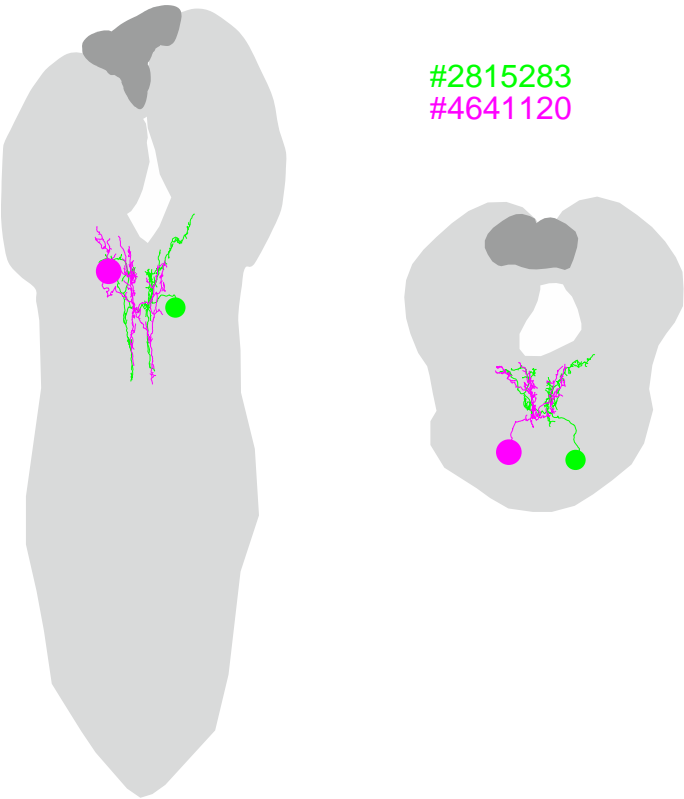

|                   |    |   |   |   |
|-------------------|----|---|---|---|
| hugin-PC right 1  | 0  | 0 | 0 | 0 |
| hugin-PC right 2  | 0  | 0 | 0 | 0 |
| hugin-PC right 3  | 0  | 0 | 0 | 0 |
| hugin-PC right 4  | 0  | 0 | 0 | 0 |
| hugin-PC left 1   | 0  | 0 | 0 | 0 |
| hugin-PC left 2   | 0  | 0 | 0 | 0 |
| hugin-PC left 3   | 0  | 0 | 0 | 0 |
| hugin-PC left 4   | 0  | 0 | 0 | 0 |
| hugin-RG right 1  | 0  | 0 | 0 | 0 |
| hugin-RG right 2  | 0  | 0 | 0 | 0 |
| hugin-RG left 1   | 0  | 0 | 0 | 0 |
| hugin-RG left 2   | 0  | 0 | 0 | 0 |
| hugin-VNC right 1 | 0  | 0 | 0 | 0 |
| hugin-VNC right 2 | 0  | 0 | 0 | 0 |
| hugin-VNC left 1  | 0  | 0 | 0 | 0 |
| hugin-VNC left 2  | 0  | 0 | 0 | 0 |
| hugin-PH right 1  | 10 | 0 | 0 | 0 |
| hugin-PH right 2  | 7  | 4 | 0 | 0 |
| hugin-PH left 1   | 3  | 3 | 0 | 0 |
| hugin-PH left 2   | 3  | 4 | 0 | 0 |

21.

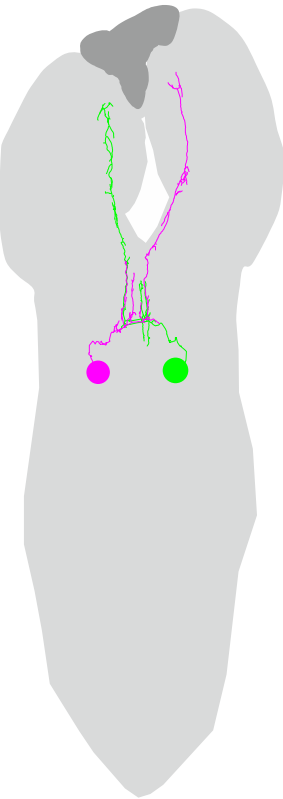

#5311299  
#5378683

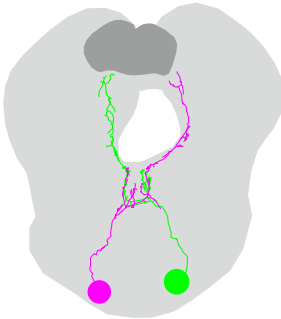

synapses to

synapses from

|                   |   |   |   |   |
|-------------------|---|---|---|---|
| hugin-PC right 1  | 0 | 0 | 0 | 0 |
| hugin-PC right 2  | 0 | 0 | 0 | 0 |
| hugin-PC right 3  | 0 | 0 | 0 | 0 |
| hugin-PC right 4  | 0 | 0 | 0 | 0 |
| hugin-PC left 1   | 0 | 0 | 0 | 0 |
| hugin-PC left 2   | 0 | 0 | 0 | 0 |
| hugin-PC left 3   | 0 | 0 | 0 | 0 |
| hugin-PC left 4   | 0 | 0 | 0 | 0 |
| hugin-RG right 1  | 0 | 0 | 0 | 0 |
| hugin-RG right 2  | 0 | 0 | 0 | 0 |
| hugin-RG left 1   | 0 | 0 | 0 | 0 |
| hugin-RG left 2   | 0 | 0 | 0 | 0 |
| hugin-VNC right 1 | 0 | 1 | 0 | 0 |
| hugin-VNC right 2 | 4 | 0 | 0 | 0 |
| hugin-VNC left 1  | 4 | 0 | 0 | 0 |
| hugin-VNC left 2  | 0 | 0 | 0 | 0 |
| hugin-PH right 1  | 0 | 0 | 0 | 0 |
| hugin-PH right 2  | 0 | 0 | 0 | 0 |
| hugin-PH left 1   | 0 | 0 | 0 | 0 |
| hugin-PH left 2   | 0 | 0 | 0 | 0 |

22.

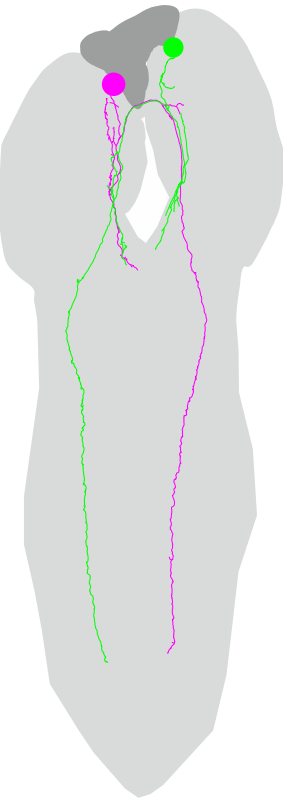

#3595837  
#10728318

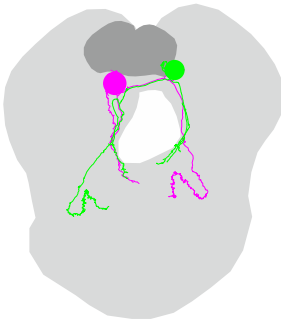

synapses to

synapses from

|                   |   |   |   |   |
|-------------------|---|---|---|---|
| hugin-PC right 1  | 0 | 0 | 0 | 0 |
| hugin-PC right 2  | 0 | 0 | 0 | 0 |
| hugin-PC right 3  | 0 | 0 | 0 | 0 |
| hugin-PC right 4  | 0 | 0 | 0 | 0 |
| hugin-PC left 1   | 0 | 0 | 0 | 0 |
| hugin-PC left 2   | 0 | 0 | 0 | 0 |
| hugin-PC left 3   | 0 | 0 | 0 | 0 |
| hugin-PC left 4   | 0 | 0 | 0 | 0 |
| hugin-RG right 1  | 0 | 0 | 0 | 0 |
| hugin-RG right 2  | 0 | 0 | 0 | 0 |
| hugin-RG left 1   | 0 | 0 | 0 | 0 |
| hugin-RG left 2   | 0 | 0 | 0 | 0 |
| hugin-VNC right 1 | 4 | 0 | 0 | 0 |
| hugin-VNC right 2 | 7 | 0 | 1 | 0 |
| hugin-VNC left 1  | 0 | 5 | 0 | 0 |
| hugin-VNC left 2  | 0 | 3 | 0 | 1 |
| hugin-PH right 1  | 0 | 0 | 0 | 0 |
| hugin-PH right 2  | 0 | 0 | 0 | 0 |
| hugin-PH left 1   | 0 | 0 | 0 | 0 |
| hugin-PH left 2   | 0 | 0 | 0 | 0 |

23.

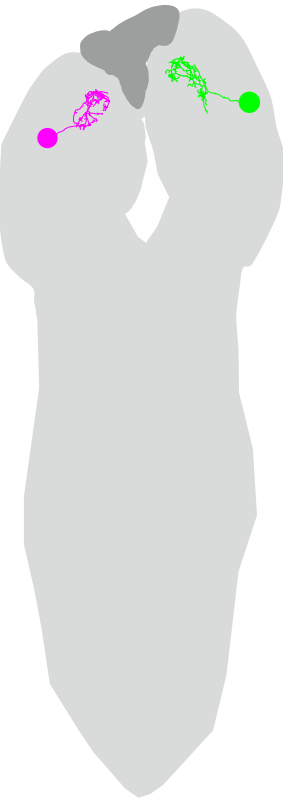

#3276003  
#7557604

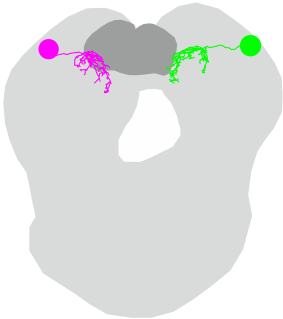

synapses to      synapses from

|                   |   |   |   |   |
|-------------------|---|---|---|---|
| hugin-PC right 1  | 4 | 0 | 2 | 0 |
| hugin-PC right 2  | 3 | 0 | 0 | 0 |
| hugin-PC right 3  | 3 | 0 | 0 | 0 |
| hugin-PC right 4  | 5 | 0 | 0 | 0 |
| hugin-PC left 1   | 0 | 4 | 0 | 0 |
| hugin-PC left 2   | 0 | 1 | 0 | 0 |
| hugin-PC left 3   | 0 | 1 | 0 | 0 |
| hugin-PC left 4   | 0 | 6 | 0 | 0 |
| hugin-RG right 1  | 0 | 0 | 0 | 0 |
| hugin-RG right 2  | 0 | 0 | 0 | 0 |
| hugin-RG left 1   | 0 | 0 | 0 | 0 |
| hugin-RG left 2   | 0 | 0 | 0 | 0 |
| hugin-VNC right 1 | 0 | 0 | 0 | 0 |
| hugin-VNC right 2 | 0 | 0 | 0 | 0 |
| hugin-VNC left 1  | 0 | 0 | 0 | 0 |
| hugin-VNC left 2  | 0 | 0 | 0 | 0 |
| hugin-PH right 1  | 0 | 0 | 0 | 0 |
| hugin-PH right 2  | 0 | 0 | 0 | 0 |
| hugin-PH left 1   | 0 | 0 | 0 | 0 |
| hugin-PH left 2   | 0 | 0 | 0 | 0 |

24.

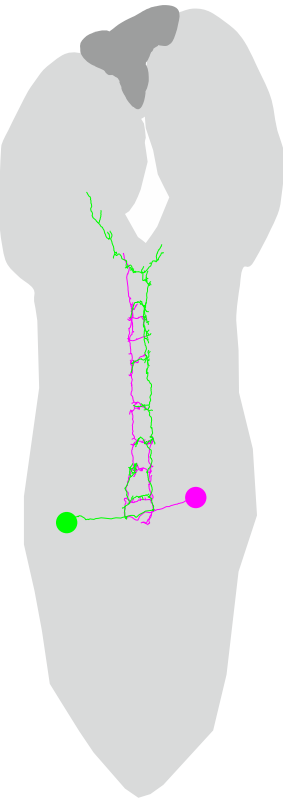

#14795310  
#14728550

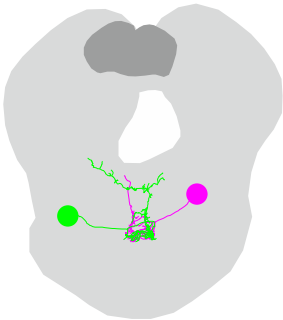

synapses to      synapses from

|                   |   |   |   |   |
|-------------------|---|---|---|---|
| hugin-PC right 1  | 0 | 0 | 0 | 0 |
| hugin-PC right 2  | 0 | 0 | 0 | 0 |
| hugin-PC right 3  | 0 | 0 | 0 | 0 |
| hugin-PC right 4  | 0 | 0 | 0 | 0 |
| hugin-PC left 1   | 0 | 0 | 0 | 0 |
| hugin-PC left 2   | 0 | 0 | 0 | 0 |
| hugin-PC left 3   | 0 | 0 | 0 | 0 |
| hugin-PC left 4   | 0 | 0 | 0 | 0 |
| hugin-RG right 1  | 0 | 0 | 0 | 0 |
| hugin-RG right 2  | 0 | 0 | 0 | 0 |
| hugin-RG left 1   | 0 | 0 | 0 | 0 |
| hugin-RG left 2   | 0 | 0 | 0 | 0 |
| hugin-VNC right 1 | 0 | 0 | 0 | 0 |
| hugin-VNC right 2 | 0 | 0 | 0 | 0 |
| hugin-VNC left 1  | 0 | 0 | 0 | 0 |
| hugin-VNC left 2  | 0 | 0 | 0 | 0 |
| hugin-PH right 1  | 3 | 0 | 0 | 0 |
| hugin-PH right 2  | 0 | 0 | 0 | 0 |
| hugin-PH left 1   | 2 | 0 | 0 | 0 |
| hugin-PH left 2   | 0 | 2 | 0 | 0 |

25.

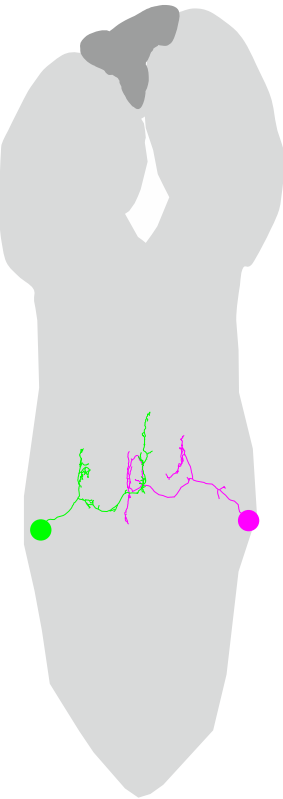

#3722787  
#5860970

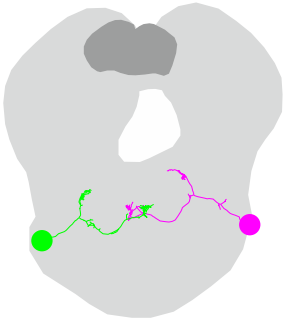

synapses to      synapses from

|                   |   |   |   |   |
|-------------------|---|---|---|---|
| hugin-PC right 1  | 0 | 0 | 0 | 0 |
| hugin-PC right 2  | 0 | 0 | 0 | 0 |
| hugin-PC right 3  | 0 | 0 | 0 | 0 |
| hugin-PC right 4  | 0 | 0 | 0 | 0 |
| hugin-PC left 1   | 0 | 0 | 0 | 0 |
| hugin-PC left 2   | 0 | 0 | 0 | 0 |
| hugin-PC left 3   | 0 | 0 | 0 | 0 |
| hugin-PC left 4   | 0 | 0 | 0 | 0 |
| hugin-RG right 1  | 0 | 0 | 0 | 0 |
| hugin-RG right 2  | 0 | 0 | 0 | 0 |
| hugin-RG left 1   | 0 | 0 | 0 | 0 |
| hugin-RG left 2   | 0 | 0 | 0 | 0 |
| hugin-VNC right 1 | 0 | 0 | 5 | 0 |
| hugin-VNC right 2 | 0 | 0 | 1 | 0 |
| hugin-VNC left 1  | 0 | 0 | 0 | 6 |
| hugin-VNC left 2  | 0 | 0 | 0 | 4 |
| hugin-PH right 1  | 0 | 0 | 0 | 0 |
| hugin-PH right 2  | 0 | 0 | 0 | 0 |
| hugin-PH left 1   | 0 | 0 | 0 | 0 |
| hugin-PH left 2   | 0 | 0 | 0 | 0 |

26.

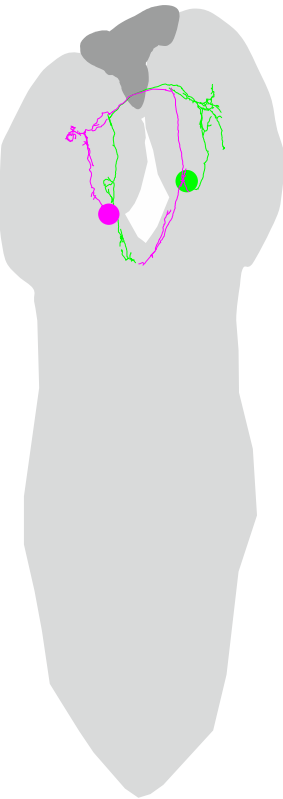

#5038920  
#5688091

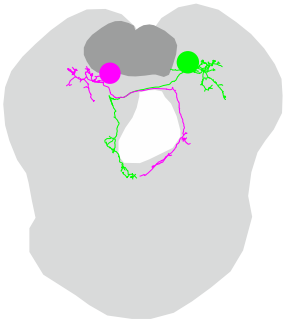

synapses to      synapses from

|                   |    |   |   |   |
|-------------------|----|---|---|---|
| hugin-PC right 1  | 0  | 0 | 0 | 0 |
| hugin-PC right 2  | 0  | 0 | 0 | 0 |
| hugin-PC right 3  | 0  | 0 | 0 | 0 |
| hugin-PC right 4  | 0  | 0 | 0 | 0 |
| hugin-PC left 1   | 0  | 0 | 0 | 0 |
| hugin-PC left 2   | 0  | 0 | 0 | 0 |
| hugin-PC left 3   | 2  | 0 | 0 | 0 |
| hugin-PC left 4   | 0  | 0 | 0 | 0 |
| hugin-RG right 1  | 5  | 6 | 0 | 0 |
| hugin-RG right 2  | 5  | 8 | 0 | 0 |
| hugin-RG left 1   | 11 | 2 | 0 | 0 |
| hugin-RG left 2   | 12 | 2 | 0 | 0 |
| hugin-VNC right 1 | 0  | 0 | 0 | 0 |
| hugin-VNC right 2 | 2  | 0 | 0 | 0 |
| hugin-VNC left 1  | 0  | 0 | 0 | 0 |
| hugin-VNC left 2  | 0  | 0 | 0 | 0 |
| hugin-PH right 1  | 0  | 0 | 0 | 0 |
| hugin-PH right 2  | 0  | 0 | 0 | 0 |
| hugin-PH left 1   | 0  | 0 | 0 | 0 |
| hugin-PH left 2   | 0  | 0 | 0 | 0 |



27.

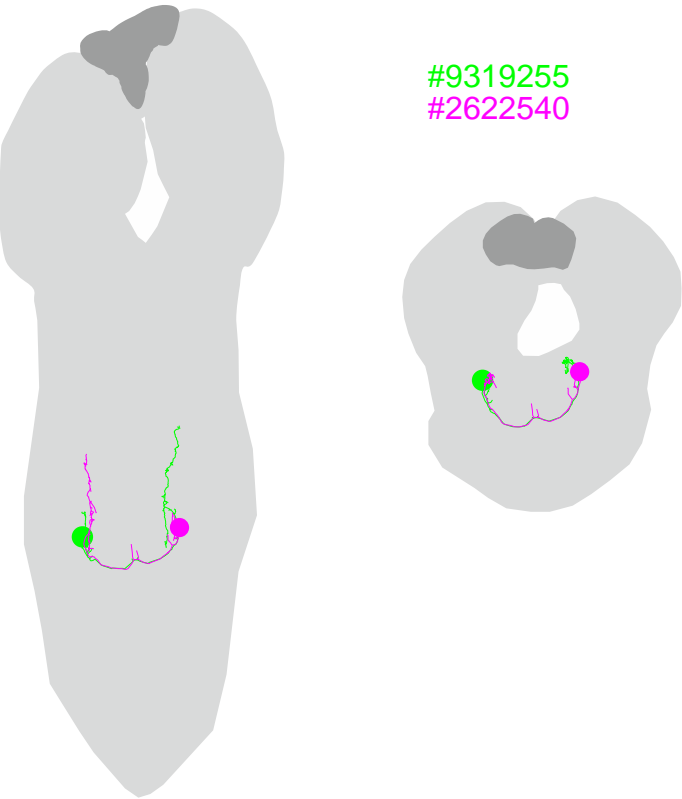

|                   | synapses to |   | synapses from |   |
|-------------------|-------------|---|---------------|---|
| hugin-PC right 1  | 0           | 0 | 0             | 0 |
| hugin-PC right 2  | 0           | 0 | 0             | 0 |
| hugin-PC right 3  | 0           | 0 | 0             | 0 |
| hugin-PC right 4  | 0           | 0 | 0             | 0 |
| hugin-PC left 1   | 0           | 0 | 0             | 0 |
| hugin-PC left 2   | 0           | 0 | 0             | 0 |
| hugin-PC left 3   | 0           | 0 | 0             | 0 |
| hugin-PC left 4   | 0           | 0 | 0             | 0 |
| hugin-RG right 1  | 0           | 0 | 0             | 0 |
| hugin-RG right 2  | 0           | 0 | 0             | 0 |
| hugin-RG left 1   | 0           | 0 | 0             | 0 |
| hugin-RG left 2   | 0           | 0 | 0             | 0 |
| hugin-VNC right 1 | 0           | 0 | 7             | 0 |
| hugin-VNC right 2 | 0           | 0 | 0             | 0 |
| hugin-VNC left 1  | 0           | 0 | 0             | 2 |
| hugin-VNC left 2  | 0           | 0 | 0             | 1 |
| hugin-PH right 1  | 0           | 0 | 0             | 0 |
| hugin-PH right 2  | 0           | 0 | 0             | 0 |
| hugin-PH left 1   | 0           | 0 | 0             | 0 |
| hugin-PH left 2   | 0           | 0 | 0             | 0 |

28.

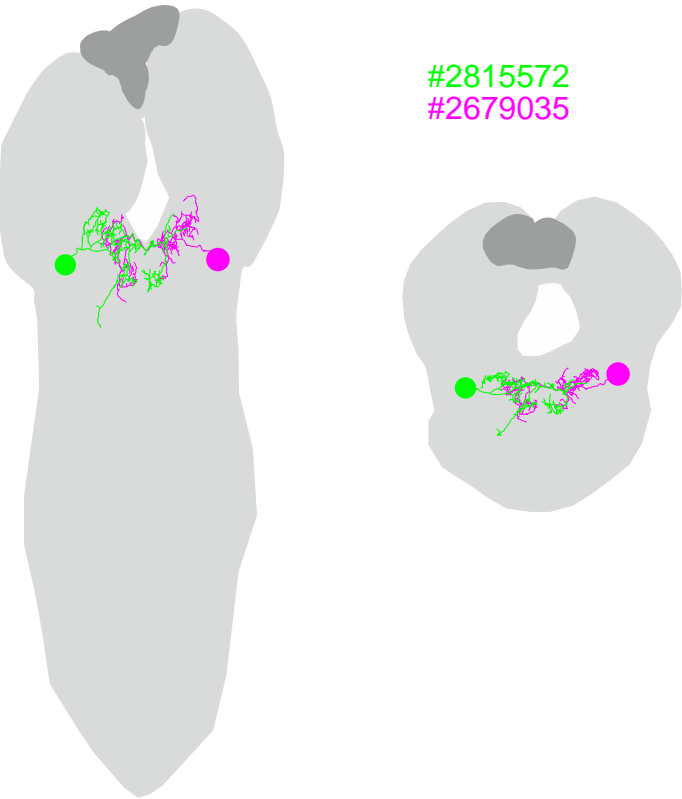

|                   | synapses to |   | synapses from |   |
|-------------------|-------------|---|---------------|---|
| hugin-PC right 1  | 0           | 0 | 0             | 0 |
| hugin-PC right 2  | 0           | 0 | 0             | 0 |
| hugin-PC right 3  | 0           | 0 | 0             | 0 |
| hugin-PC right 4  | 0           | 1 | 0             | 0 |
| hugin-PC left 1   | 0           | 0 | 0             | 0 |
| hugin-PC left 2   | 0           | 0 | 0             | 0 |
| hugin-PC left 3   | 0           | 1 | 1             | 0 |
| hugin-PC left 4   | 0           | 0 | 0             | 0 |
| hugin-RG right 1  | 0           | 0 | 0             | 0 |
| hugin-RG right 2  | 0           | 0 | 0             | 0 |
| hugin-RG left 1   | 0           | 0 | 0             | 0 |
| hugin-RG left 2   | 0           | 0 | 0             | 0 |
| hugin-VNC right 1 | 0           | 0 | 0             | 0 |
| hugin-VNC right 2 | 0           | 0 | 0             | 0 |
| hugin-VNC left 1  | 0           | 0 | 0             | 0 |
| hugin-VNC left 2  | 0           | 0 | 0             | 0 |
| hugin-PH right 1  | 3           | 0 | 0             | 0 |
| hugin-PH right 2  | 2           | 0 | 0             | 0 |
| hugin-PH left 1   | 0           | 1 | 0             | 0 |
| hugin-PH left 2   | 1           | 2 | 0             | 0 |

29.

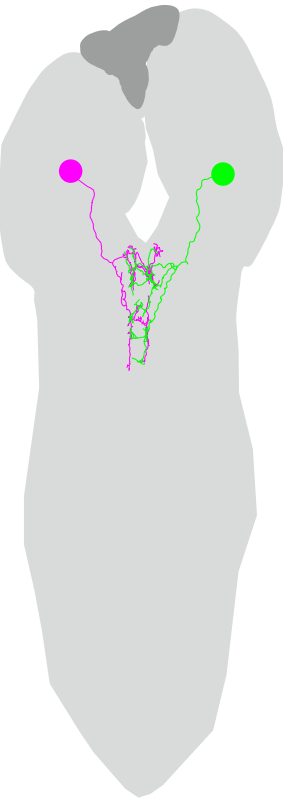

#864517  
#3266033

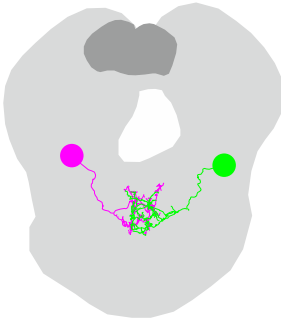

synapses to

synapses from

|                   |   |   |   |   |
|-------------------|---|---|---|---|
| hugin-PC right 1  | 0 | 0 | 0 | 0 |
| hugin-PC right 2  | 0 | 0 | 0 | 0 |
| hugin-PC right 3  | 0 | 0 | 0 | 0 |
| hugin-PC right 4  | 0 | 0 | 0 | 0 |
| hugin-PC left 1   | 0 | 0 | 0 | 0 |
| hugin-PC left 2   | 0 | 0 | 0 | 0 |
| hugin-PC left 3   | 0 | 0 | 0 | 0 |
| hugin-PC left 4   | 0 | 0 | 0 | 0 |
| hugin-RG right 1  | 0 | 0 | 0 | 0 |
| hugin-RG right 2  | 0 | 0 | 0 | 0 |
| hugin-RG left 1   | 0 | 0 | 0 | 0 |
| hugin-RG left 2   | 0 | 0 | 0 | 0 |
| hugin-VNC right 1 | 0 | 0 | 0 | 0 |
| hugin-VNC right 2 | 0 | 0 | 0 | 0 |
| hugin-VNC left 1  | 0 | 0 | 0 | 0 |
| hugin-VNC left 2  | 0 | 0 | 0 | 0 |
| hugin-PH right 1  | 0 | 2 | 0 | 0 |
| hugin-PH right 2  | 0 | 1 | 0 | 0 |
| hugin-PH left 1   | 0 | 0 | 0 | 0 |
| hugin-PH left 2   | 5 | 2 | 0 | 0 |

30.

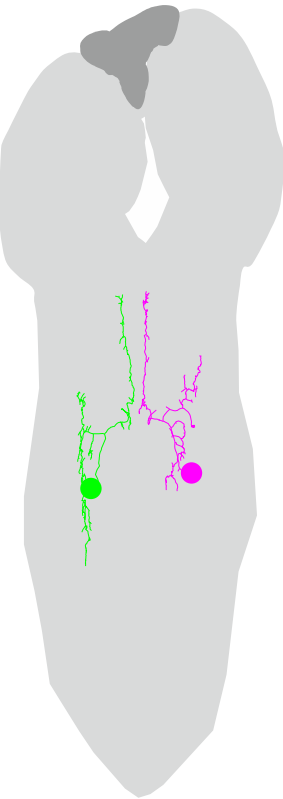

#12042430  
#12944429

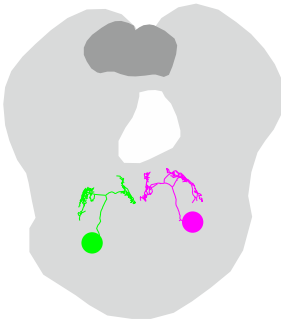

synapses to

synapses from

|                   |   |   |   |   |
|-------------------|---|---|---|---|
| hugin-PC right 1  | 0 | 0 | 0 | 0 |
| hugin-PC right 2  | 0 | 0 | 0 | 0 |
| hugin-PC right 3  | 0 | 0 | 0 | 0 |
| hugin-PC right 4  | 0 | 0 | 0 | 0 |
| hugin-PC left 1   | 0 | 0 | 0 | 0 |
| hugin-PC left 2   | 0 | 0 | 0 | 0 |
| hugin-PC left 3   | 0 | 0 | 0 | 0 |
| hugin-PC left 4   | 0 | 0 | 0 | 0 |
| hugin-RG right 1  | 0 | 0 | 0 | 0 |
| hugin-RG right 2  | 0 | 0 | 0 | 0 |
| hugin-RG left 1   | 0 | 0 | 0 | 0 |
| hugin-RG left 2   | 0 | 0 | 0 | 0 |
| hugin-VNC right 1 | 0 | 0 | 7 | 0 |
| hugin-VNC right 2 | 0 | 0 | 7 | 0 |
| hugin-VNC left 1  | 0 | 0 | 0 | 3 |
| hugin-VNC left 2  | 0 | 0 | 0 | 3 |
| hugin-PH right 1  | 0 | 0 | 0 | 0 |
| hugin-PH right 2  | 0 | 0 | 0 | 0 |
| hugin-PH left 1   | 0 | 0 | 0 | 0 |
| hugin-PH left 2   | 0 | 0 | 0 | 0 |

31.

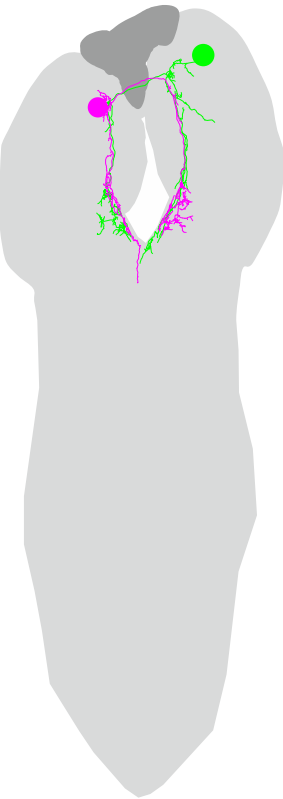

#3436420  
#6445994

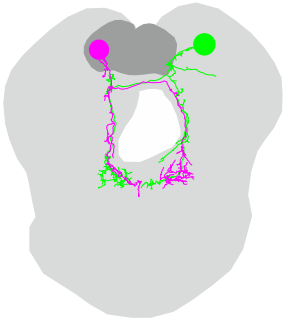

synapses to

synapses from

|                   |   |   |   |   |
|-------------------|---|---|---|---|
| hugin-PC right 1  | 0 | 0 | 0 | 2 |
| hugin-PC right 2  | 0 | 0 | 0 | 2 |
| hugin-PC right 3  | 0 | 1 | 2 | 0 |
| hugin-PC right 4  | 0 | 0 | 1 | 1 |
| hugin-PC left 1   | 0 | 0 | 0 | 2 |
| hugin-PC left 2   | 1 | 0 | 1 | 0 |
| hugin-PC left 3   | 0 | 0 | 1 | 2 |
| hugin-PC left 4   | 2 | 1 | 1 | 1 |
| hugin-RG right 1  | 0 | 0 | 0 | 0 |
| hugin-RG right 2  | 0 | 0 | 0 | 0 |
| hugin-RG left 1   | 0 | 0 | 0 | 0 |
| hugin-RG left 2   | 0 | 0 | 0 | 0 |
| hugin-VNC right 1 | 0 | 0 | 0 | 0 |
| hugin-VNC right 2 | 1 | 0 | 0 | 0 |
| hugin-VNC left 1  | 1 | 0 | 0 | 0 |
| hugin-VNC left 2  | 0 | 0 | 0 | 0 |
| hugin-PH right 1  | 0 | 0 | 0 | 0 |
| hugin-PH right 2  | 0 | 0 | 0 | 0 |
| hugin-PH left 1   | 0 | 0 | 0 | 0 |
| hugin-PH left 2   | 0 | 0 | 0 | 0 |

32.

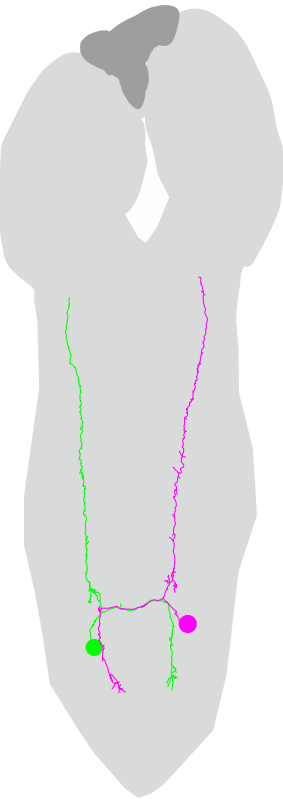

#8010889  
#2622502

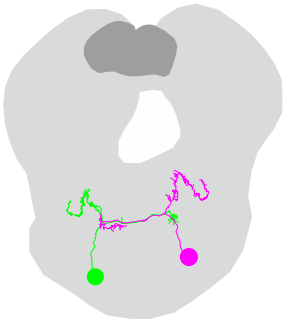

synapses to

synapses from

|                   |   |    |   |   |
|-------------------|---|----|---|---|
| hugin-PC right 1  | 0 | 0  | 0 | 0 |
| hugin-PC right 2  | 0 | 0  | 0 | 0 |
| hugin-PC right 3  | 0 | 0  | 0 | 0 |
| hugin-PC right 4  | 0 | 0  | 0 | 0 |
| hugin-PC left 1   | 0 | 0  | 0 | 0 |
| hugin-PC left 2   | 0 | 0  | 0 | 0 |
| hugin-PC left 3   | 0 | 0  | 0 | 0 |
| hugin-PC left 4   | 0 | 0  | 0 | 0 |
| hugin-RG right 1  | 0 | 0  | 0 | 0 |
| hugin-RG right 2  | 0 | 0  | 0 | 0 |
| hugin-RG left 1   | 0 | 0  | 0 | 0 |
| hugin-RG left 2   | 0 | 0  | 0 | 0 |
| hugin-VNC right 1 | 8 | 0  | 2 | 0 |
| hugin-VNC right 2 | 8 | 0  | 1 | 0 |
| hugin-VNC left 1  | 0 | 8  | 0 | 4 |
| hugin-VNC left 2  | 0 | 13 | 0 | 3 |
| hugin-PH right 1  | 0 | 0  | 0 | 0 |
| hugin-PH right 2  | 0 | 0  | 0 | 0 |
| hugin-PH left 1   | 0 | 0  | 0 | 0 |
| hugin-PH left 2   | 0 | 0  | 0 | 0 |

33.

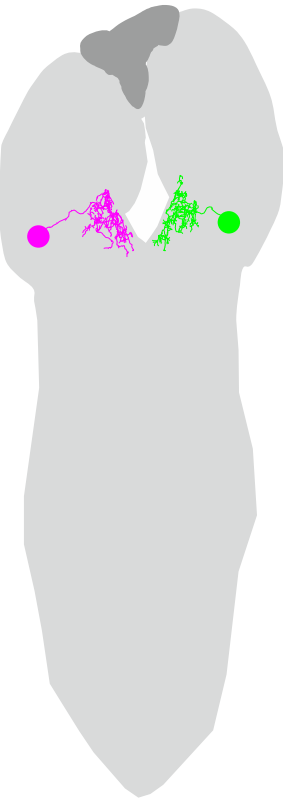

#9748981  
#7136254

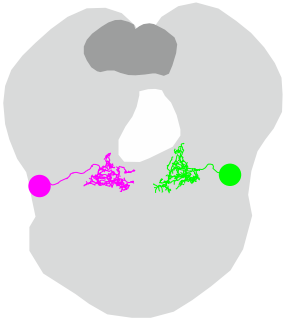

synapses to      synapses from

|                   |   |   |   |   |
|-------------------|---|---|---|---|
| hugin-PC right 1  | 1 | 0 | 0 | 0 |
| hugin-PC right 2  | 0 | 0 | 0 | 0 |
| hugin-PC right 3  | 2 | 0 | 3 | 0 |
| hugin-PC right 4  | 0 | 0 | 2 | 0 |
| hugin-PC left 1   | 0 | 0 | 0 | 2 |
| hugin-PC left 2   | 0 | 0 | 0 | 1 |
| hugin-PC left 3   | 0 | 0 | 0 | 0 |
| hugin-PC left 4   | 0 | 0 | 0 | 1 |
| hugin-RG right 1  | 0 | 0 | 0 | 0 |
| hugin-RG right 2  | 0 | 0 | 0 | 0 |
| hugin-RG left 1   | 0 | 0 | 0 | 0 |
| hugin-RG left 2   | 0 | 0 | 0 | 0 |
| hugin-VNC right 1 | 0 | 0 | 0 | 0 |
| hugin-VNC right 2 | 0 | 1 | 0 | 0 |
| hugin-VNC left 1  | 0 | 0 | 0 | 0 |
| hugin-VNC left 2  | 0 | 0 | 0 | 0 |
| hugin-PH right 1  | 0 | 0 | 0 | 0 |
| hugin-PH right 2  | 0 | 0 | 0 | 0 |
| hugin-PH left 1   | 0 | 0 | 0 | 0 |
| hugin-PH left 2   | 0 | 0 | 0 | 0 |

34.

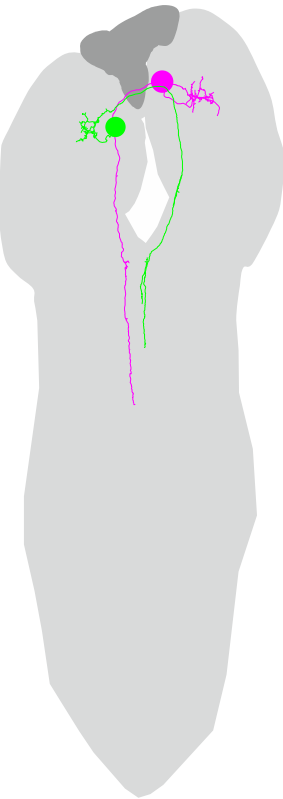

#7338309  
#5500958

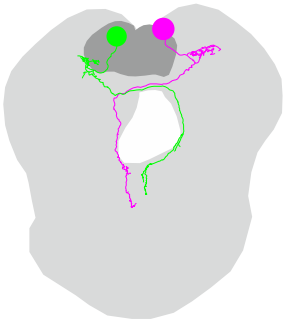

synapses to      synapses from

|                   |   |   |   |   |
|-------------------|---|---|---|---|
| hugin-PC right 1  | 0 | 0 | 0 | 0 |
| hugin-PC right 2  | 0 | 0 | 0 | 0 |
| hugin-PC right 3  | 0 | 0 | 0 | 0 |
| hugin-PC right 4  | 0 | 0 | 0 | 0 |
| hugin-PC left 1   | 0 | 0 | 0 | 0 |
| hugin-PC left 2   | 0 | 0 | 0 | 0 |
| hugin-PC left 3   | 0 | 0 | 0 | 0 |
| hugin-PC left 4   | 0 | 0 | 0 | 0 |
| hugin-RG right 1  | 0 | 0 | 0 | 0 |
| hugin-RG right 2  | 0 | 0 | 0 | 0 |
| hugin-RG left 1   | 0 | 0 | 0 | 0 |
| hugin-RG left 2   | 0 | 0 | 0 | 0 |
| hugin-VNC right 1 | 0 | 0 | 0 | 0 |
| hugin-VNC right 2 | 0 | 0 | 0 | 0 |
| hugin-VNC left 1  | 3 | 0 | 0 | 0 |
| hugin-VNC left 2  | 0 | 0 | 0 | 0 |
| hugin-PH right 1  | 0 | 0 | 0 | 0 |
| hugin-PH right 2  | 0 | 0 | 0 | 0 |
| hugin-PH left 1   | 0 | 0 | 0 | 0 |
| hugin-PH left 2   | 0 | 0 | 0 | 0 |

35.

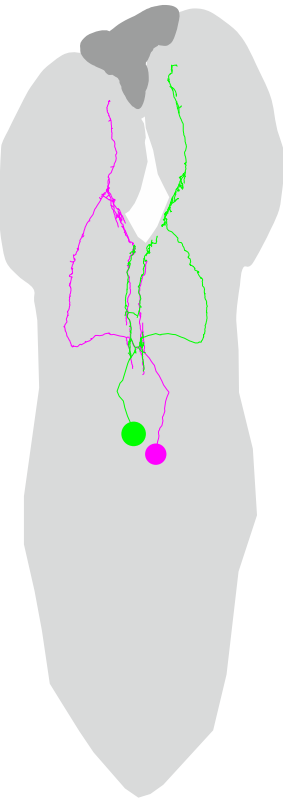

#5614978  
#9935752

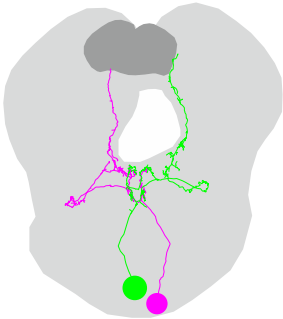

synapses to

synapses from

|                   |   |   |   |   |
|-------------------|---|---|---|---|
| hugin-PC right 1  | 0 | 0 | 0 | 0 |
| hugin-PC right 2  | 7 | 0 | 1 | 0 |
| hugin-PC right 3  | 2 | 0 | 2 | 0 |
| hugin-PC right 4  | 2 | 0 | 0 | 0 |
| hugin-PC left 1   | 0 | 0 | 0 | 0 |
| hugin-PC left 2   | 0 | 0 | 0 | 0 |
| hugin-PC left 3   | 0 | 1 | 0 | 0 |
| hugin-PC left 4   | 0 | 4 | 0 | 0 |
| hugin-RG right 1  | 1 | 0 | 0 | 0 |
| hugin-RG right 2  | 3 | 0 | 0 | 0 |
| hugin-RG left 1   | 0 | 0 | 0 | 0 |
| hugin-RG left 2   | 0 | 1 | 0 | 0 |
| hugin-VNC right 1 | 0 | 0 | 0 | 1 |
| hugin-VNC right 2 | 0 | 2 | 0 | 0 |
| hugin-VNC left 1  | 0 | 0 | 0 | 0 |
| hugin-VNC left 2  | 0 | 0 | 0 | 0 |
| hugin-PH right 1  | 0 | 0 | 0 | 0 |
| hugin-PH right 2  | 0 | 0 | 0 | 0 |
| hugin-PH left 1   | 0 | 0 | 0 | 0 |
| hugin-PH left 2   | 0 | 0 | 0 | 0 |

36.

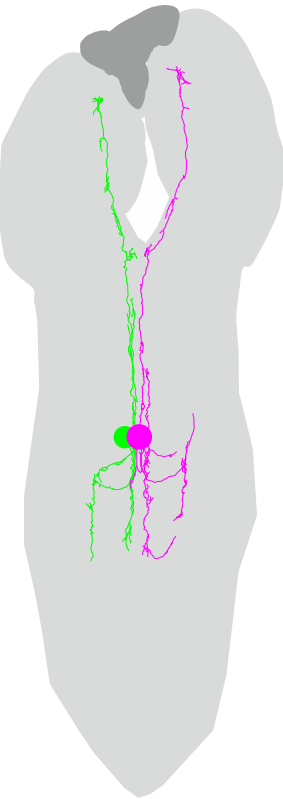

#327976  
#5531637

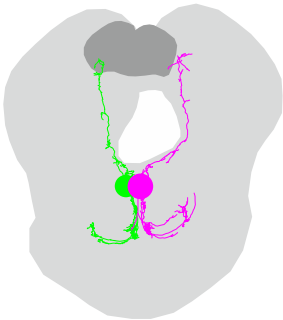

synapses to

synapses from

|                   |    |   |   |   |
|-------------------|----|---|---|---|
| hugin-PC right 1  | 0  | 0 | 0 | 0 |
| hugin-PC right 2  | 0  | 0 | 0 | 0 |
| hugin-PC right 3  | 0  | 0 | 0 | 0 |
| hugin-PC right 4  | 0  | 0 | 0 | 0 |
| hugin-PC left 1   | 0  | 0 | 0 | 0 |
| hugin-PC left 2   | 1  | 0 | 0 | 0 |
| hugin-PC left 3   | 4  | 0 | 0 | 0 |
| hugin-PC left 4   | 0  | 0 | 0 | 0 |
| hugin-RG right 1  | 1  | 2 | 0 | 0 |
| hugin-RG right 2  | 1  | 3 | 0 | 0 |
| hugin-RG left 1   | 8  | 2 | 0 | 0 |
| hugin-RG left 2   | 0  | 0 | 0 | 0 |
| hugin-VNC right 1 | 2  | 5 | 0 | 0 |
| hugin-VNC right 2 | 10 | 0 | 0 | 0 |
| hugin-VNC left 1  | 5  | 4 | 0 | 0 |
| hugin-VNC left 2  | 0  | 1 | 0 | 0 |
| hugin-PH right 1  | 0  | 0 | 0 | 0 |
| hugin-PH right 2  | 0  | 0 | 0 | 0 |
| hugin-PH left 1   | 0  | 0 | 0 | 0 |
| hugin-PH left 2   | 0  | 0 | 0 | 0 |

37.

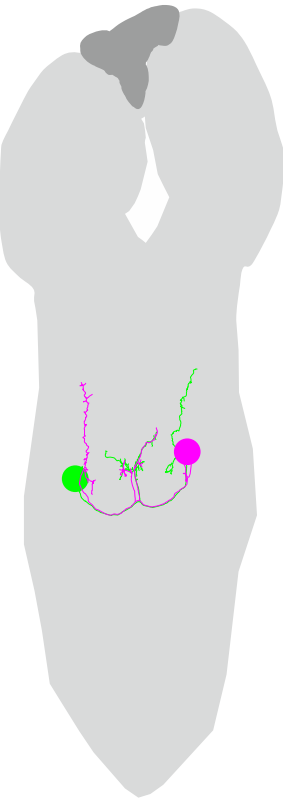

#8748462  
#4284599

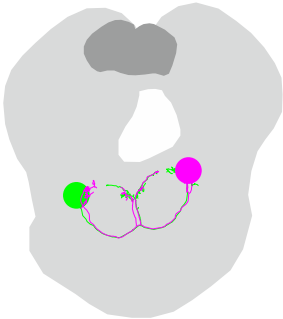

synapses to      synapses from

|                   |   |   |   |   |
|-------------------|---|---|---|---|
| hugin-PC right 1  | 0 | 0 | 0 | 0 |
| hugin-PC right 2  | 0 | 0 | 0 | 0 |
| hugin-PC right 3  | 0 | 0 | 0 | 0 |
| hugin-PC right 4  | 0 | 0 | 0 | 0 |
| hugin-PC left 1   | 0 | 0 | 0 | 0 |
| hugin-PC left 2   | 0 | 0 | 0 | 0 |
| hugin-PC left 3   | 0 | 0 | 0 | 0 |
| hugin-PC left 4   | 0 | 0 | 0 | 0 |
| hugin-RG right 1  | 0 | 0 | 0 | 0 |
| hugin-RG right 2  | 0 | 0 | 0 | 0 |
| hugin-RG left 1   | 0 | 0 | 0 | 0 |
| hugin-RG left 2   | 0 | 0 | 0 | 0 |
| hugin-VNC right 1 | 0 | 0 | 3 | 0 |
| hugin-VNC right 2 | 0 | 0 | 1 | 0 |
| hugin-VNC left 1  | 0 | 0 | 0 | 3 |
| hugin-VNC left 2  | 0 | 0 | 0 | 1 |
| hugin-PH right 1  | 0 | 0 | 0 | 0 |
| hugin-PH right 2  | 0 | 0 | 0 | 0 |
| hugin-PH left 1   | 0 | 0 | 0 | 0 |
| hugin-PH left 2   | 0 | 0 | 0 | 0 |

38.

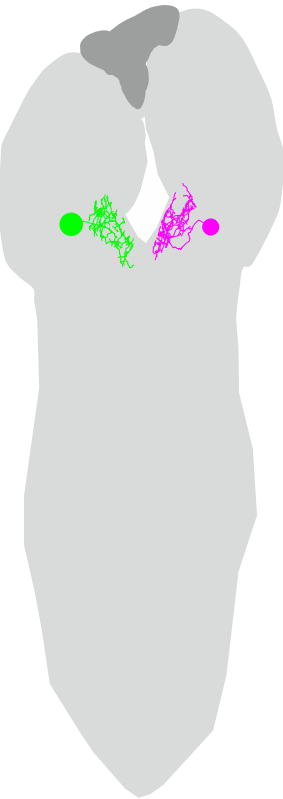

#4284106  
#9758503

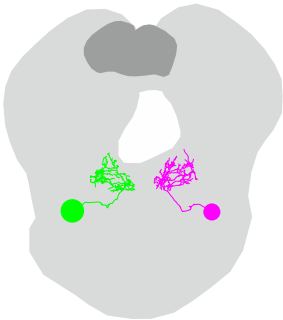

synapses to      synapses from

|                   |   |   |   |   |
|-------------------|---|---|---|---|
| hugin-PC right 1  | 0 | 0 | 0 | 2 |
| hugin-PC right 2  | 0 | 0 | 0 | 0 |
| hugin-PC right 3  | 0 | 2 | 0 | 0 |
| hugin-PC right 4  | 0 | 1 | 0 | 0 |
| hugin-PC left 1   | 1 | 0 | 1 | 0 |
| hugin-PC left 2   | 0 | 0 | 3 | 0 |
| hugin-PC left 3   | 0 | 0 | 1 | 0 |
| hugin-PC left 4   | 3 | 0 | 0 | 0 |
| hugin-RG right 1  | 0 | 0 | 0 | 0 |
| hugin-RG right 2  | 0 | 0 | 0 | 0 |
| hugin-RG left 1   | 0 | 0 | 0 | 0 |
| hugin-RG left 2   | 0 | 0 | 0 | 0 |
| hugin-VNC right 1 | 0 | 0 | 0 | 0 |
| hugin-VNC right 2 | 0 | 0 | 0 | 0 |
| hugin-VNC left 1  | 0 | 0 | 0 | 0 |
| hugin-VNC left 2  | 0 | 0 | 0 | 0 |
| hugin-PH right 1  | 0 | 0 | 0 | 0 |
| hugin-PH right 2  | 0 | 0 | 0 | 0 |
| hugin-PH left 1   | 0 | 0 | 0 | 0 |
| hugin-PH left 2   | 0 | 0 | 0 | 0 |

39.

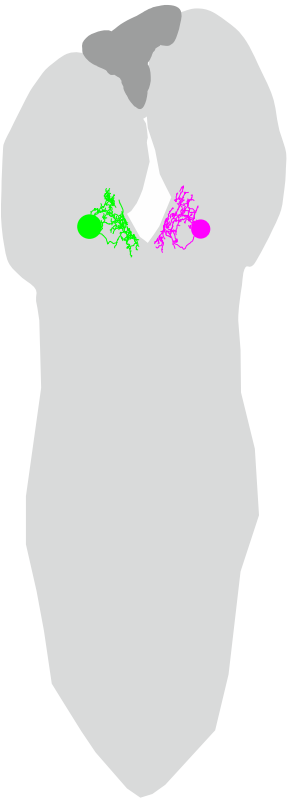

#9805588  
#11868260

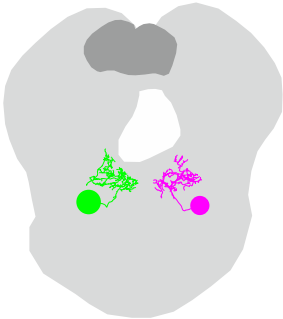

synapses to      synapses from

|                   |   |   |   |   |
|-------------------|---|---|---|---|
| hugin-PC right 1  | 0 | 0 | 0 | 0 |
| hugin-PC right 2  | 0 | 2 | 0 | 0 |
| hugin-PC right 3  | 0 | 1 | 0 | 0 |
| hugin-PC right 4  | 0 | 0 | 0 | 0 |
| hugin-PC left 1   | 5 | 0 | 2 | 0 |
| hugin-PC left 2   | 1 | 0 | 1 | 0 |
| hugin-PC left 3   | 0 | 0 | 1 | 0 |
| hugin-PC left 4   | 1 | 0 | 1 | 0 |
| hugin-RG right 1  | 0 | 0 | 0 | 0 |
| hugin-RG right 2  | 0 | 0 | 0 | 0 |
| hugin-RG left 1   | 0 | 0 | 0 | 0 |
| hugin-RG left 2   | 0 | 0 | 0 | 0 |
| hugin-VNC right 1 | 0 | 0 | 0 | 0 |
| hugin-VNC right 2 | 0 | 0 | 0 | 0 |
| hugin-VNC left 1  | 0 | 0 | 0 | 0 |
| hugin-VNC left 2  | 0 | 0 | 0 | 0 |
| hugin-PH right 1  | 0 | 0 | 0 | 0 |
| hugin-PH right 2  | 0 | 0 | 0 | 0 |
| hugin-PH left 1   | 0 | 0 | 0 | 0 |
| hugin-PH left 2   | 0 | 0 | 0 | 0 |

40.

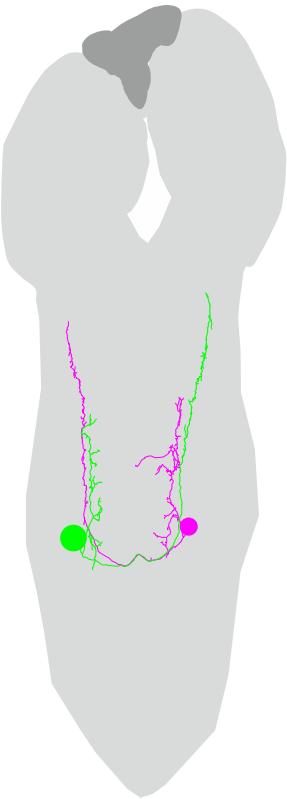

#18461988  
#5607156

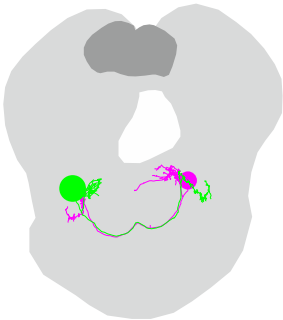

synapses to      synapses from

|                   |   |   |   |   |
|-------------------|---|---|---|---|
| hugin-PC right 1  | 0 | 0 | 0 | 0 |
| hugin-PC right 2  | 0 | 0 | 0 | 0 |
| hugin-PC right 3  | 0 | 0 | 0 | 0 |
| hugin-PC right 4  | 0 | 0 | 0 | 0 |
| hugin-PC left 1   | 0 | 0 | 0 | 0 |
| hugin-PC left 2   | 0 | 0 | 0 | 0 |
| hugin-PC left 3   | 0 | 0 | 0 | 0 |
| hugin-PC left 4   | 0 | 0 | 0 | 0 |
| hugin-RG right 1  | 0 | 0 | 0 | 0 |
| hugin-RG right 2  | 0 | 0 | 0 | 0 |
| hugin-RG left 1   | 0 | 0 | 0 | 0 |
| hugin-RG left 2   | 0 | 0 | 0 | 0 |
| hugin-VNC right 1 | 0 | 3 | 1 | 1 |
| hugin-VNC right 2 | 0 | 2 | 1 | 5 |
| hugin-VNC left 1  | 1 | 0 | 4 | 0 |
| hugin-VNC left 2  | 5 | 0 | 2 | 1 |
| hugin-PH right 1  | 0 | 0 | 0 | 0 |
| hugin-PH right 2  | 0 | 0 | 0 | 0 |
| hugin-PH left 1   | 0 | 0 | 0 | 0 |
| hugin-PH left 2   | 0 | 0 | 0 | 0 |

41.

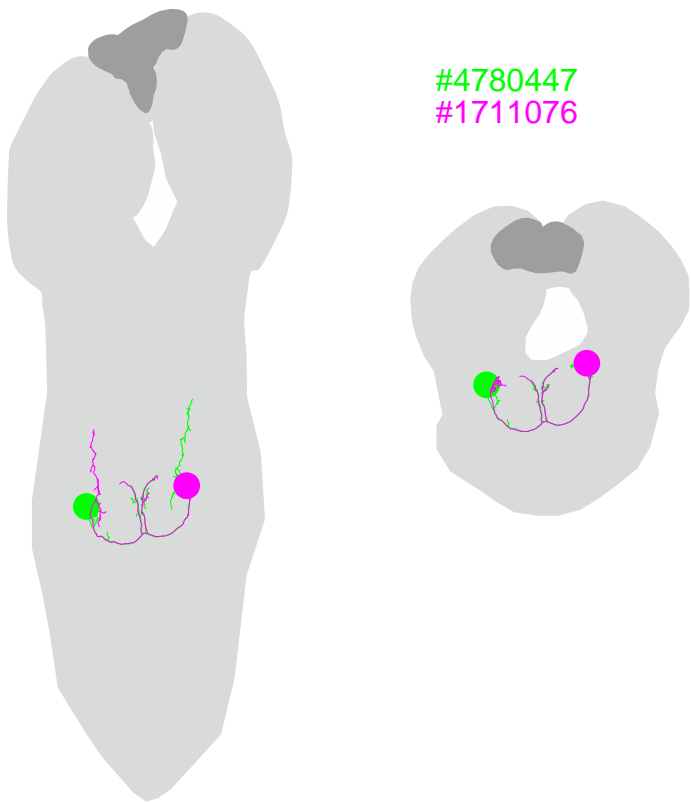

synapses to      synapses from

|                   |   |   |   |   |
|-------------------|---|---|---|---|
| hugin-PC right 1  | 0 | 0 | 0 | 0 |
| hugin-PC right 2  | 0 | 0 | 0 | 0 |
| hugin-PC right 3  | 0 | 0 | 0 | 0 |
| hugin-PC right 4  | 0 | 0 | 0 | 0 |
| hugin-PC left 1   | 0 | 0 | 0 | 0 |
| hugin-PC left 2   | 0 | 0 | 0 | 0 |
| hugin-PC left 3   | 0 | 0 | 0 | 0 |
| hugin-PC left 4   | 0 | 0 | 0 | 0 |
| hugin-RG right 1  | 0 | 0 | 0 | 0 |
| hugin-RG right 2  | 0 | 0 | 0 | 0 |
| hugin-RG left 1   | 0 | 0 | 0 | 0 |
| hugin-RG left 2   | 0 | 0 | 0 | 0 |
| hugin-VNC right 1 | 0 | 0 | 3 | 0 |
| hugin-VNC right 2 | 0 | 0 | 0 | 0 |
| hugin-VNC left 1  | 0 | 0 | 0 | 2 |
| hugin-VNC left 2  | 0 | 0 | 0 | 1 |
| hugin-PH right 1  | 0 | 0 | 0 | 0 |
| hugin-PH right 2  | 0 | 0 | 0 | 0 |
| hugin-PH left 1   | 0 | 0 | 0 | 0 |
| hugin-PH left 2   | 0 | 0 | 0 | 0 |

42.

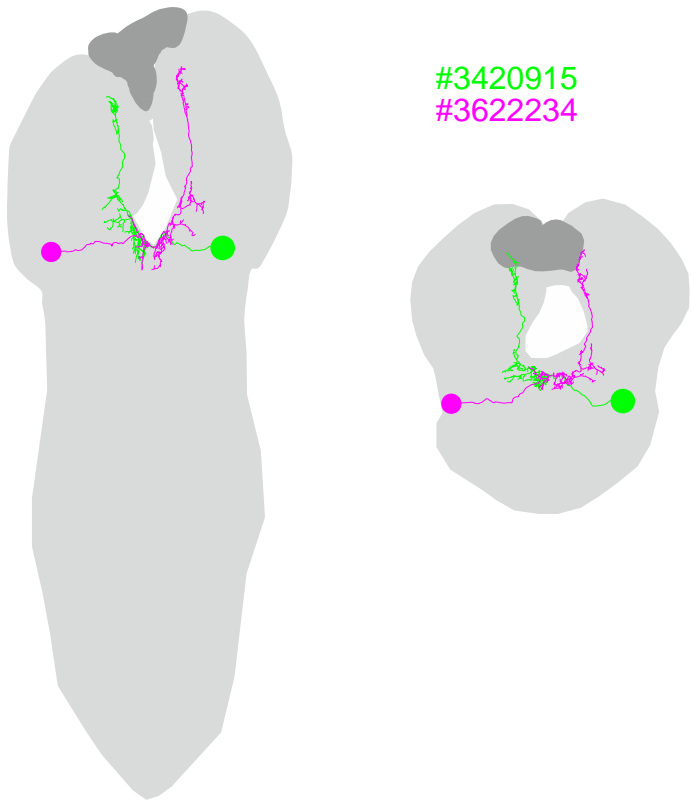

synapses to      synapses from

|                   |   |   |   |   |
|-------------------|---|---|---|---|
| hugin-PC right 1  | 0 | 0 | 0 | 0 |
| hugin-PC right 2  | 0 | 0 | 0 | 1 |
| hugin-PC right 3  | 0 | 1 | 0 | 1 |
| hugin-PC right 4  | 0 | 0 | 0 | 2 |
| hugin-PC left 1   | 2 | 0 | 0 | 0 |
| hugin-PC left 2   | 0 | 0 | 2 | 0 |
| hugin-PC left 3   | 2 | 0 | 4 | 0 |
| hugin-PC left 4   | 0 | 0 | 1 | 1 |
| hugin-RG right 1  | 0 | 0 | 0 | 0 |
| hugin-RG right 2  | 0 | 0 | 0 | 0 |
| hugin-RG left 1   | 0 | 0 | 0 | 0 |
| hugin-RG left 2   | 0 | 0 | 0 | 0 |
| hugin-VNC right 1 | 0 | 2 | 0 | 0 |
| hugin-VNC right 2 | 1 | 0 | 0 | 0 |
| hugin-VNC left 1  | 4 | 0 | 1 | 0 |
| hugin-VNC left 2  | 0 | 2 | 0 | 0 |
| hugin-PH right 1  | 0 | 0 | 0 | 0 |
| hugin-PH right 2  | 0 | 0 | 0 | 0 |
| hugin-PH left 1   | 0 | 0 | 0 | 0 |
| hugin-PH left 2   | 0 | 0 | 0 | 0 |



43.

synapses to      synapses from

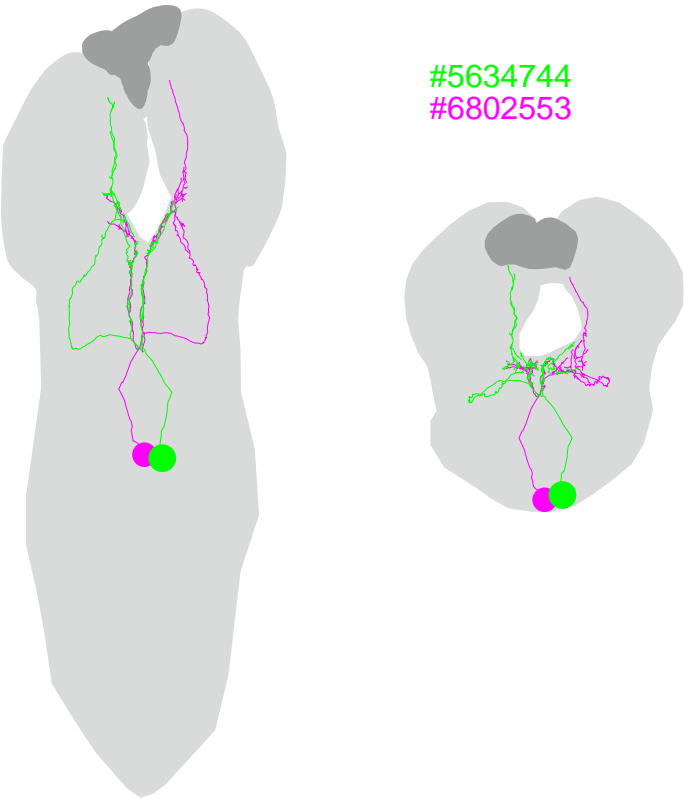

|                   |   |    |   |   |
|-------------------|---|----|---|---|
| hugin-PC right 1  | 0 | 10 | 0 | 2 |
| hugin-PC right 2  | 0 | 11 | 0 | 4 |
| hugin-PC right 3  | 0 | 7  | 0 | 1 |
| hugin-PC right 4  | 0 | 2  | 0 | 0 |
| hugin-PC left 1   | 6 | 0  | 2 | 1 |
| hugin-PC left 2   | 5 | 0  | 1 | 0 |
| hugin-PC left 3   | 8 | 0  | 2 | 0 |
| hugin-PC left 4   | 5 | 0  | 0 | 0 |
| hugin-RG right 1  | 0 | 0  | 0 | 0 |
| hugin-RG right 2  | 0 | 0  | 0 | 0 |
| hugin-RG left 1   | 0 | 0  | 0 | 0 |
| hugin-RG left 2   | 0 | 0  | 0 | 0 |
| hugin-VNC right 1 | 0 | 0  | 0 | 0 |
| hugin-VNC right 2 | 0 | 0  | 0 | 0 |
| hugin-VNC left 1  | 0 | 0  | 0 | 0 |
| hugin-VNC left 2  | 0 | 0  | 0 | 0 |
| hugin-PH right 1  | 0 | 0  | 0 | 0 |
| hugin-PH right 2  | 0 | 0  | 0 | 0 |
| hugin-PH left 1   | 0 | 0  | 0 | 0 |
| hugin-PH left 2   | 0 | 0  | 0 | 0 |

K Unpaired medial interneurons

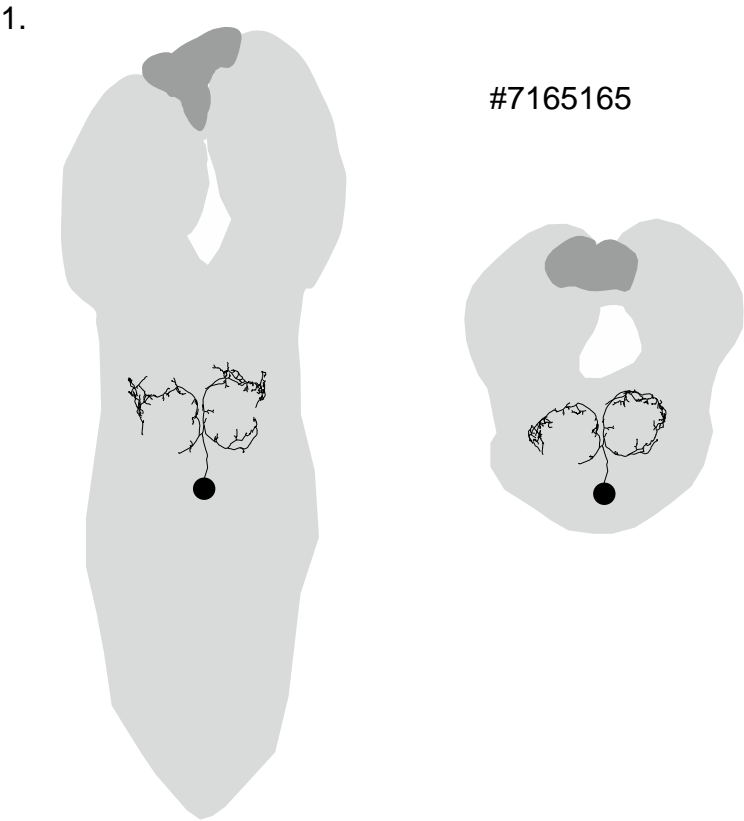

|                   | synapses to | synapses from |
|-------------------|-------------|---------------|
| hugin-PC right 1  | 0           | 0             |
| hugin-PC right 2  | 0           | 0             |
| hugin-PC right 3  | 0           | 0             |
| hugin-PC right 4  | 0           | 0             |
| hugin-PC left 1   | 0           | 0             |
| hugin-PC left 2   | 0           | 0             |
| hugin-PC left 3   | 0           | 0             |
| hugin-PC left 4   | 0           | 0             |
| hugin-RG right 1  | 0           | 0             |
| hugin-RG right 2  | 0           | 0             |
| hugin-RG left 1   | 0           | 0             |
| hugin-RG left 2   | 0           | 0             |
| hugin-VNC right 1 | 0           | 5             |
| hugin-VNC right 2 | 0           | 4             |
| hugin-VNC left 1  | 0           | 2             |
| hugin-VNC left 2  | 0           | 3             |
| hugin-PH right 1  | 0           | 0             |
| hugin-PH right 2  | 0           | 0             |
| hugin-PH left 1   | 0           | 0             |
| hugin-PH left 2   | 0           | 0             |

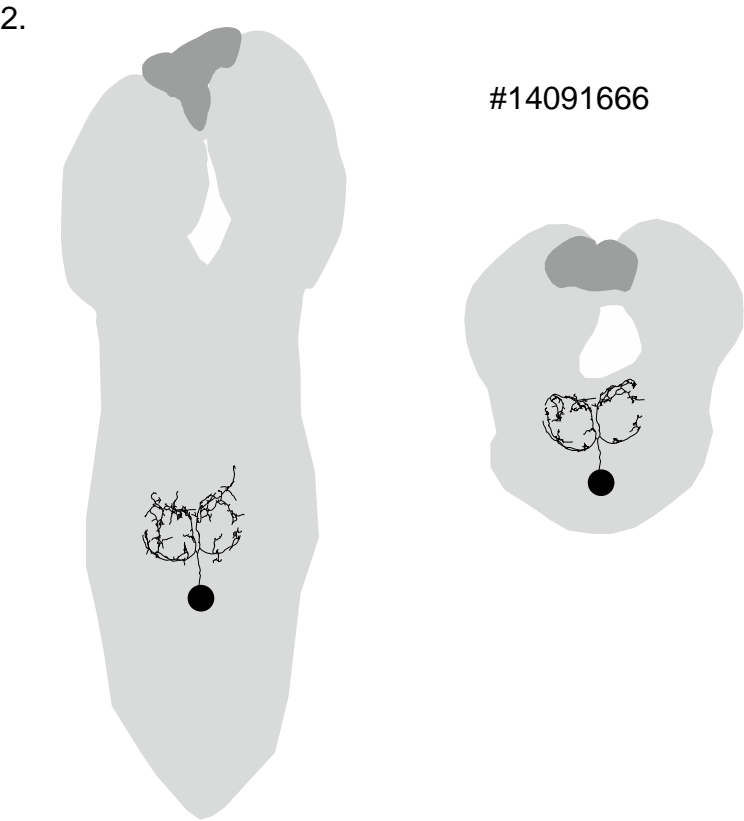

|                   | synapses to | synapses from |
|-------------------|-------------|---------------|
| hugin-PC right 1  | 0           | 0             |
| hugin-PC right 2  | 0           | 0             |
| hugin-PC right 3  | 0           | 0             |
| hugin-PC right 4  | 0           | 0             |
| hugin-PC left 1   | 0           | 0             |
| hugin-PC left 2   | 0           | 0             |
| hugin-PC left 3   | 0           | 0             |
| hugin-PC left 4   | 0           | 0             |
| hugin-RG right 1  | 0           | 0             |
| hugin-RG right 2  | 0           | 0             |
| hugin-RG left 1   | 0           | 0             |
| hugin-RG left 2   | 0           | 0             |
| hugin-VNC right 1 | 0           | 0             |
| hugin-VNC right 2 | 0           | 3             |
| hugin-VNC left 1  | 0           | 0             |
| hugin-VNC left 2  | 0           | 0             |
| hugin-PH right 1  | 0           | 0             |
| hugin-PH right 2  | 0           | 0             |
| hugin-PH left 1   | 0           | 0             |
| hugin-PH left 2   | 0           | 0             |
