# Supplementary figures and images for: Synaptic transmission parallels neuromodulation in a central food-intake circuit
Source: eLife journal article supplement (doi:10.7554/elife.16799), 2016-11-15

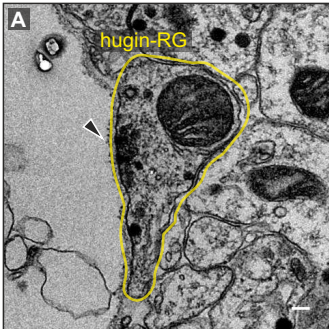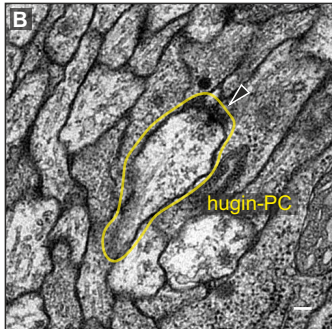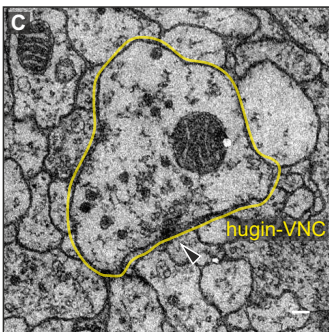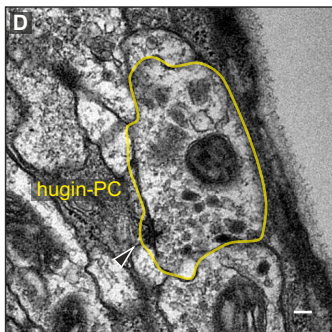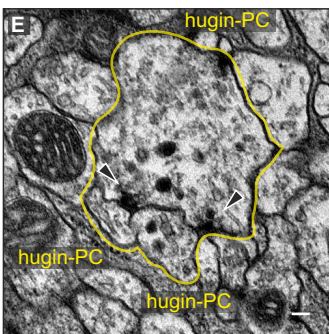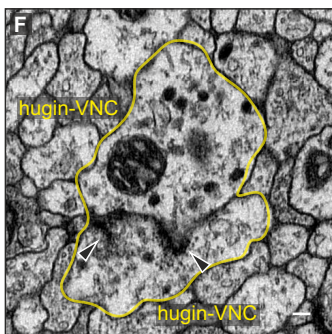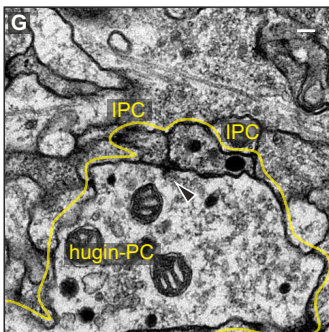

Supplement: supp [file elife_poa_e16799_Figure_2_figure_supplement_1.pdf › elife_poa_e16799_Figure_2_figure_supplement_1.pdf]

**A** dorsal perspective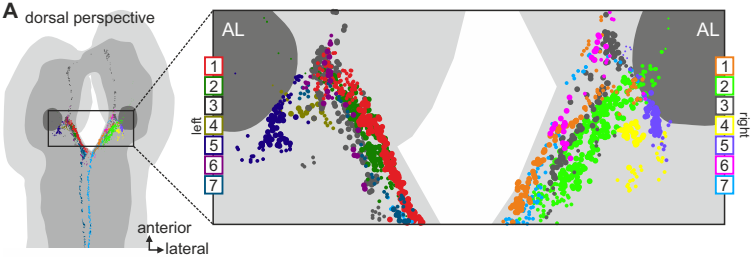

frontal perspective

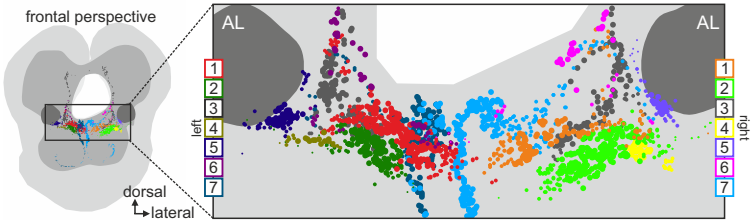**B**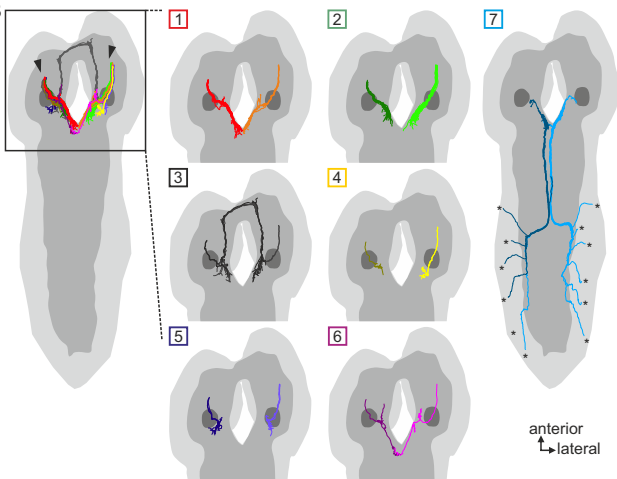

Supplement: supp [file elife_poa_e16799_Figure_6_figure_supplement_1.pdf › elife_poa_e16799_Figure_6_figure_supplement_1.pdf]

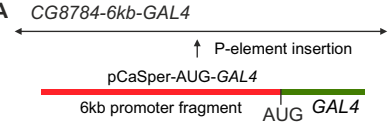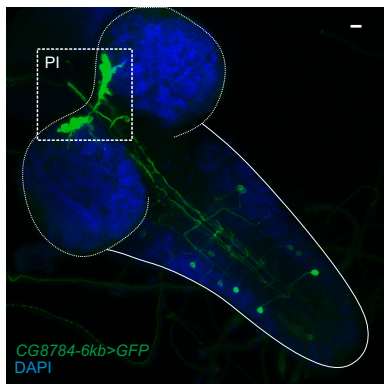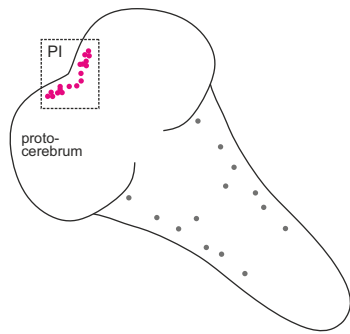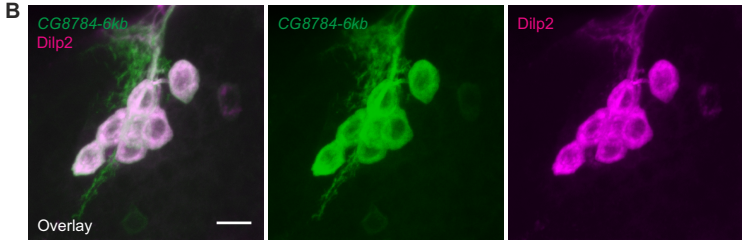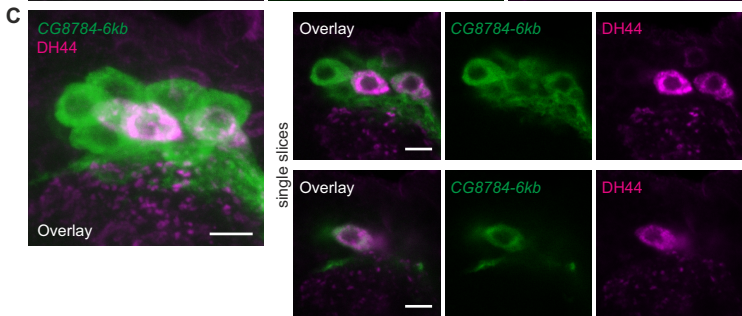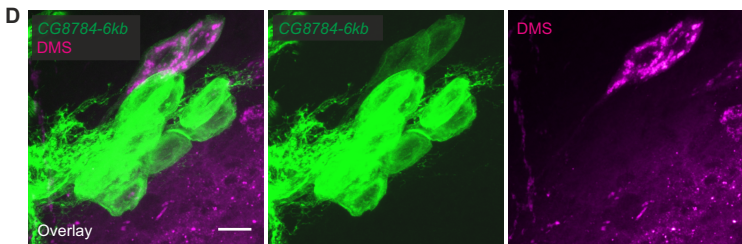

Supplement: supp [file elife_poa_e16799_Figure_8_figure_supplement_1.pdf › elife_poa_e16799_Figure_8_figure_supplement_1.pdf]

**A**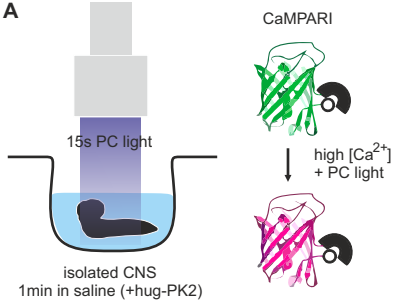**B**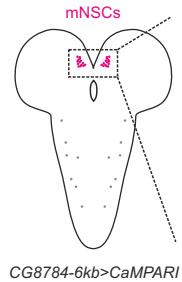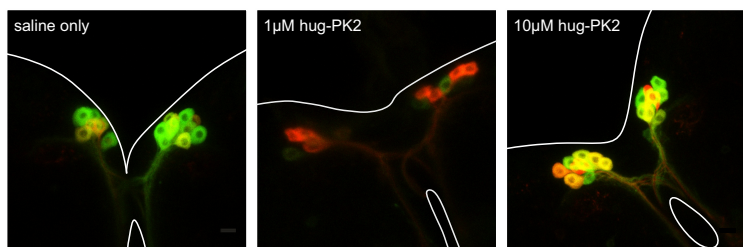**C**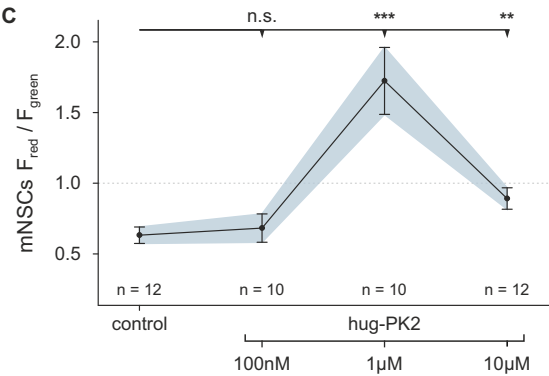

Supplement: supp [file elife_poa_e16799_Figure_8_figure_supplement_2.pdf › elife_poa_e16799_Figure_8_figure_supplement_2.pdf]
